# Supplementary material
Source: PubMed Central journal article supplement (PMC3031766)
Supplement: NIHMS260166-supplement-1_si_001.pdf [file NIHMS260166-supplement-1_si_001.pdf]

Supporting Information for:

Application of Catalytic Dynamic Resolution of *N*-Boc-2-lithiopiperidine to the Asymmetric  
Synthesis of 2-Aryl and 2-Vinyl Piperidines

*Timothy K. Beng and Robert E. Gawley\**

*Department of Chemistry and Biochemistry, University of Arkansas,  
Fayetteville, AR, 72701, USA*

[bgawley@uark.edu](mailto:bgawley@uark.edu)

*Contents:*

|                                                                           |     |
|---------------------------------------------------------------------------|-----|
| 1. Structures and Syntheses.....                                          | S2  |
| 2. General procedures .....                                               | S6  |
| 3. Optimization of reaction conditions for arylation.....                 | S12 |
| 4. Arylation of <i>N</i> -Boc-piperidine with several electrophiles ..... | S13 |
| 4.1. Electrophilic addition of bromobenzene.....                          | S13 |
| 4.2. Electrophilic addition of <i>o</i> -bromotoluene.....                | S13 |
| 4.3. Electrophilic addition of 4-bromoveratrole .....                     | S18 |
| 4.4. Electrophilic addition of <i>p</i> - <i>tert</i> -butylbenzene.....  | S23 |
| 4.5. Electrophilic addition of 2-bromomesitylene .....                    | S28 |
| 4.6. Electrophilic addition of <i>p</i> -bromoacetophenone.....           | S31 |
| 4.7. Electrophilic addition of <i>p</i> -bromobenzonitrile.....           | S36 |
| 4.8. Electrophilic addition of 4-bromo-2-trifluoromethyl aniline.....     | S41 |
| 4.9. Electrophilic addition of 1-bromonaphthalene .....                   | S46 |
| 4.10. Electrophilic addition of 3-bromopyridine .....                     | S51 |
| 4.11. Electrophilic addition of 2-bromopyridine .....                     | S52 |
| 4.12. Electrophilic addition of 2-bromopyrimidine .....                   | S55 |
| 5. Synthesis of both enantiomers of anabasine .....                       | S59 |

|                                                                            |     |
|----------------------------------------------------------------------------|-----|
| 6. Vinylation of <i>N</i> -Boc-piperidine with several electrophiles ..... | S60 |
| 6.1. Electrophilic addition of 1-bromo-1-propene .....                     | S60 |
| 6.2. Electrophilic addition of $\beta$ -bromostyrene .....                 | S64 |
| 7. References .....                                                        | S69 |

## 1. Structures

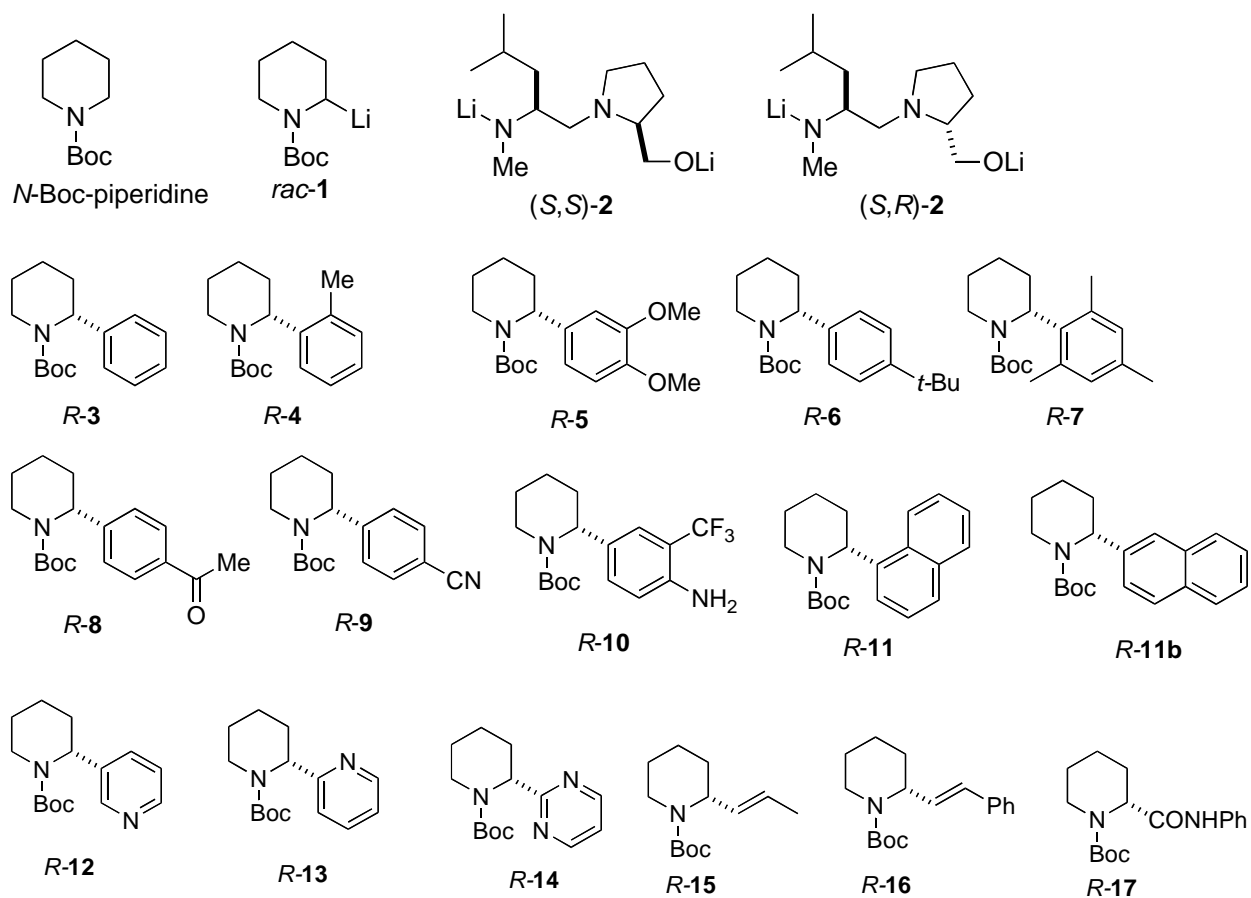

## **2. General/Typical Procedures**

The experiments involving organolithium reagents were carried out under an inert atmosphere of argon. All solvents were freshly distilled. Tetrahydrofuran (THF) was predried over molecular sieves and distilled from sodium benzophenone ketyl. Diethyl ether (Et<sub>2</sub>O) was distilled from sodium benzophenone ketyl. The ligands (*S,S*)-**2** and (*S,R*)-**2** were purified by Kugelrohr distillation. The concentration of commercial *s*-BuLi (solution in cyclohexane) was determined prior to use by No-D NMR spectroscopy<sup>1</sup> with 1,5-cyclooctadiene (COD) as the internal standard. Column chromatography was performed on silica gel (230-400 mesh). For all enantiomer ratio (er) analyses, authentic racemic compounds were used to establish the method of separation of the enantiomers. The enantiomer ratios were determined by CSP-SFC, monitoring at 210 and 254 nm. The following chiral columns were utilized: Regis Technologies Pirkle-Whelk-O-1, with a chiral stationary phase of 4-(3,5-dinitrobenzamido) tetrahydrophenanthrene, covalently bound to silica, and Daicel Chiralcel OD-H, with a chiral stationary phase of 4-Cellulose tris-(3,5-dimethylphenylcarbamate) coated on 5µm silica-gel. The temperature was controlled by a thermostatted cooling coil and all reported temperatures are internal to a reaction vessel. Unless otherwise indicated, <sup>1</sup>H, <sup>13</sup>C, DEPT-135, HMQC NMR spectra were acquired using CDCl<sub>3</sub> as solvent at room temperature. Chemical shifts are quoted in parts per million (ppm).

The alcohol precursors to ligands (*S,S*)-**2** and (*S,R*)-**2** were synthesized according to our previously reported method.<sup>2a</sup>

The full <sup>1</sup>H NMR assignments are provided below.

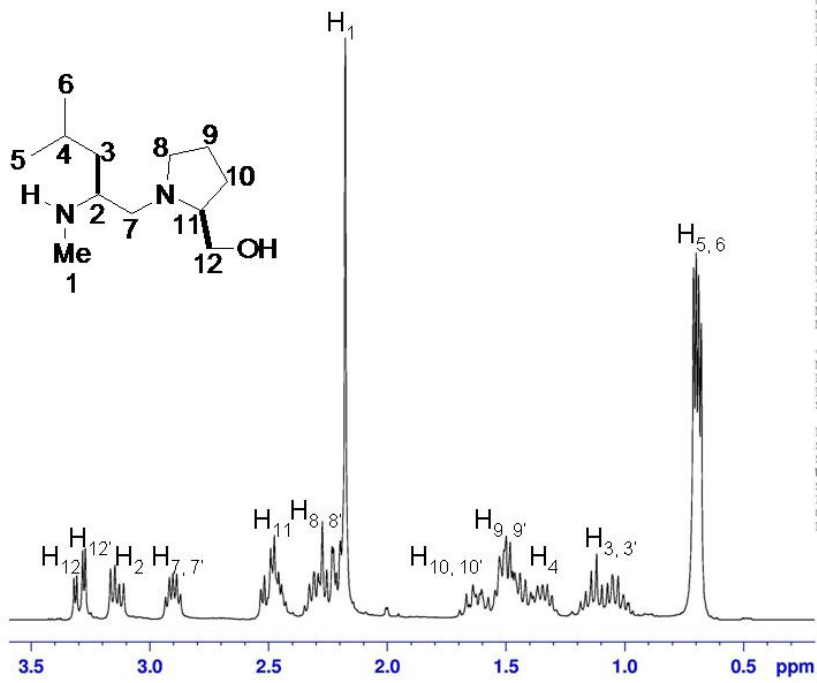

**DEPT-135 spectrum**

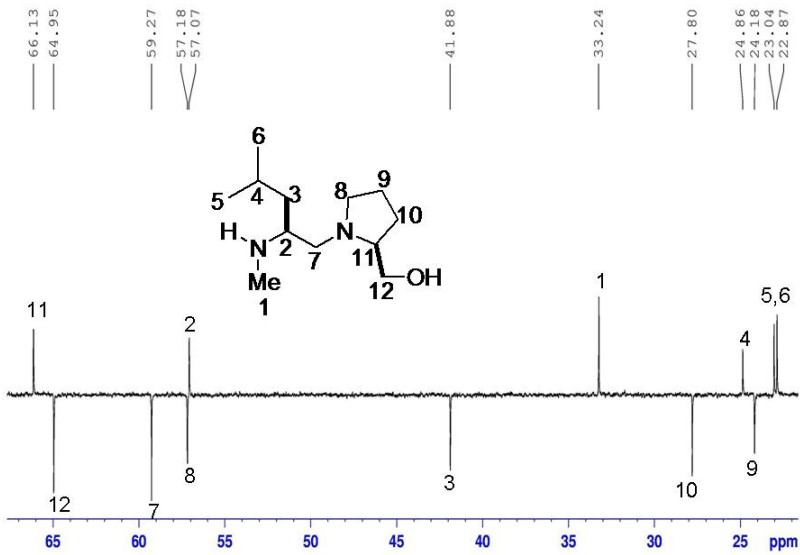

HMQC for alcohol precursor to (*S,S*)-2

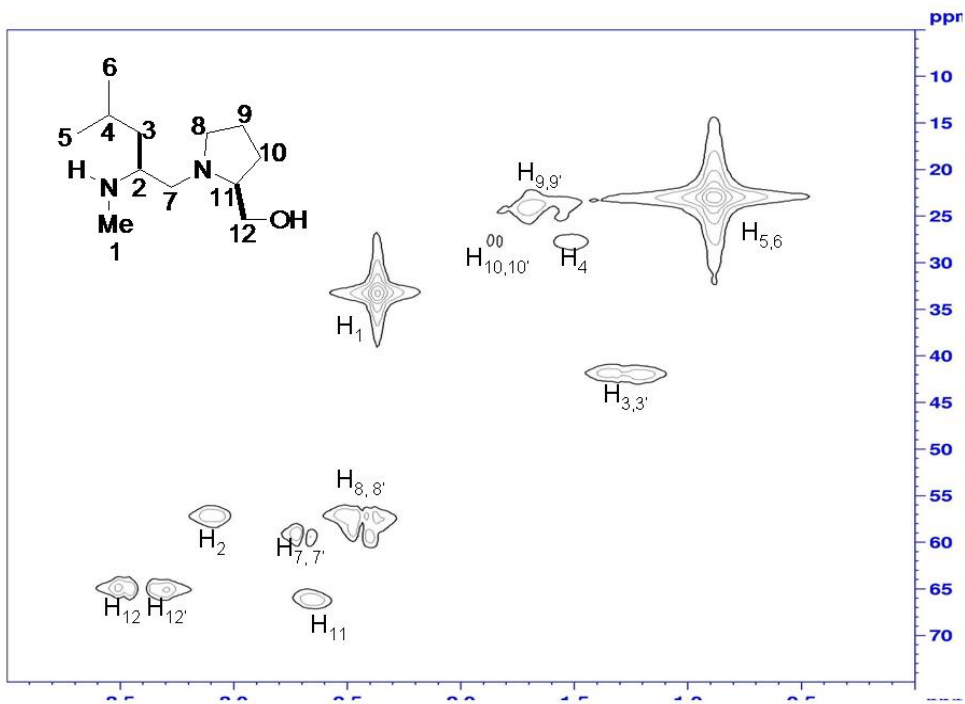

<sup>1</sup>H NMR spectrum for the alcohol precursor to (*S,R*)-2

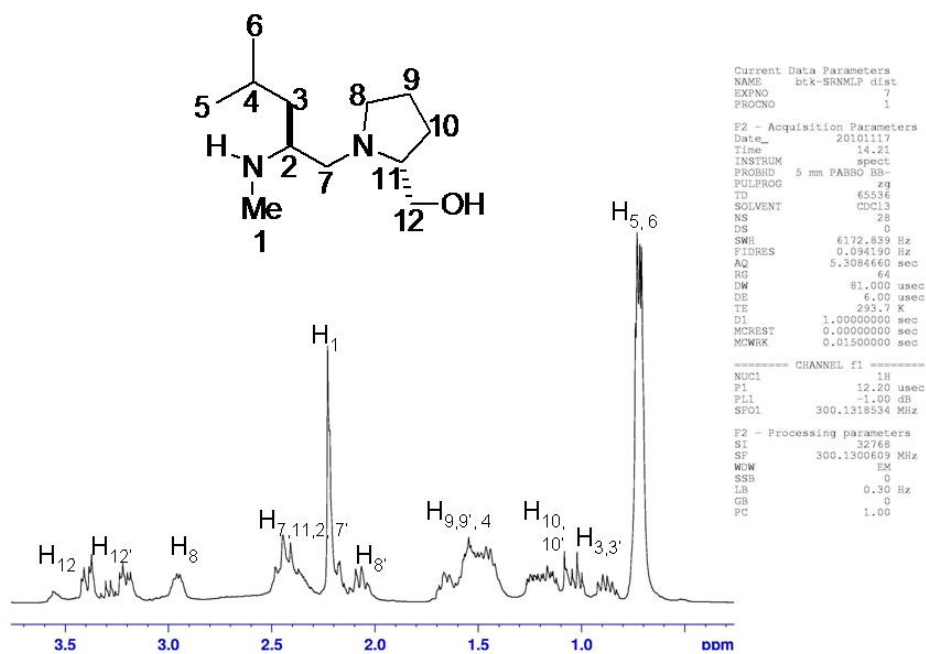

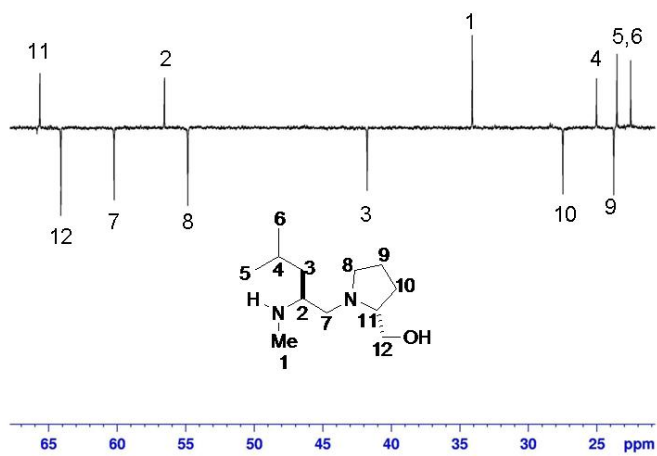

HMQC for the alcohol precursor to (*S,R*)-2

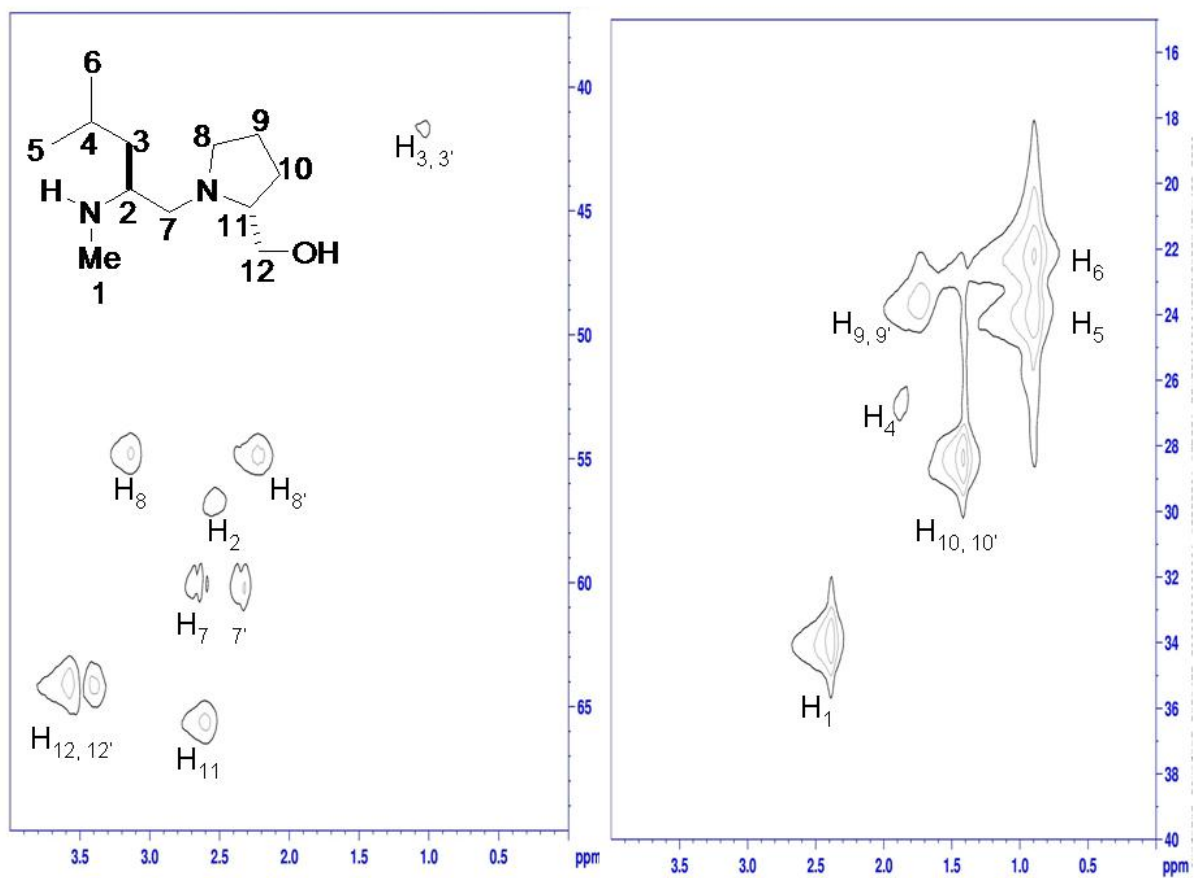

### A. General Procedure for Catalytic Dynamic Resolution (CDR) of 2-lithio-*N*-Boc-piperidine followed by Transmetalation and Negishi Cross Coupling

In an oven-dried, septum-capped 25 mL round bottom flask equipped with a stir bar, *freshly* distilled *N*-Boc-piperidine (2 mmol, 1.0 equiv) and *freshly* distilled TMEDA (8 mmol, 4.0 equiv) were dissolved in *freshly* distilled Et<sub>2</sub>O under argon. The solution was cooled to -78 °C and *s*-BuLi (2.4 mmol, 1.2 equiv) was added slowly by means of a syringe, down the side of the flask, over a ten minute period. The mixture was stirred for 3 h to effect deprotonation, affording *rac*-1·TMEDA. The extent of deprotonation was monitored by quenching an aliquot of the reaction mixture with methanol-d<sub>1</sub> (CH<sub>3</sub>OD) and checking for deuterium incorporation by GC-MS. *Freshly* distilled dilithiated diamino alcohol, precursor of (*S,S*)-2 (0.1 mmol, 5 mol %) in Et<sub>2</sub>O was treated with *s*-BuLi (10 mol %). After complete deprotonation of *N*-Boc-piperidine as noted by GC-MS (there is a shift in the molecular ion peak from *m/z* 185 to *m/z* 186 after deuterium incorporation; see attached spectra below), the preformed alkoxide (*S,S*)-2 was added and the flask was quickly transferred to a second thermostatted bath at -45 °C, and allowed to stir for 5 h. A solution of anhydrous ZnCl<sub>2</sub> (2.6 mmol in 2.6 mL THF, 1.0 M, 1.3 equiv), was added slowly over a ten minute period and the mixture was stirred for 30 minutes followed by warming to room temperature. After 30 minutes, Pd(OAc)<sub>2</sub> (0.08 mmol, 4 mol %), *t*-Bu<sub>3</sub>P·HBF<sub>4</sub> (0.16 mmol, 8 mol %) and the aryl bromide, for example bromobenzene (2.6 mmol, 1.3 equiv) were added sequentially. After stirring for 18 h at room temperature, NH<sub>4</sub>OH (10 mL, 10% aqueous solution) was added dropwise and the mixture was stirred for 30 minutes. The resulting slurry was filtered through Celite and rinsed with 10 mL Et<sub>2</sub>O. The filtrate was washed with 1 M HCl<sub>(aq)</sub> (20 mL), then with water (2 x 10 mL), dried over Na<sub>2</sub>SO<sub>4</sub> and evaporated under reduced pressure to obtain the crude product. Purification by silica gel column chromatography was accompanied by er determination.

## GC-MS of *N*-Boc-piperidine

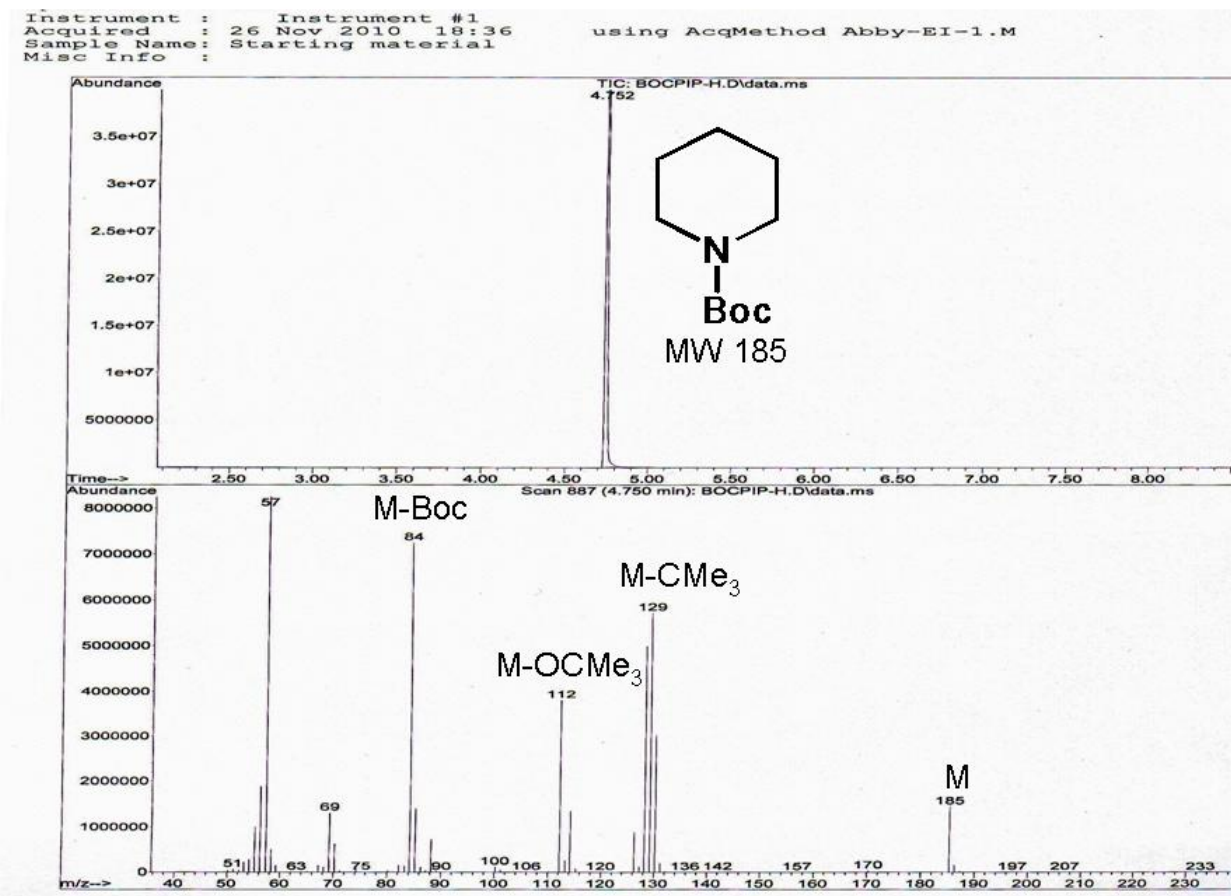

### Monitoring the extent of deprotonation of *N*-Boc-piperidine at $-78\text{ }^{\circ}\text{C}$

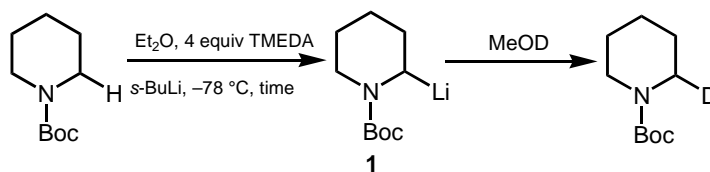

In an oven-dried, septum-capped 25 mL round bottom flask equipped with a stir bar, *freshly* distilled *N*-Boc-piperidine (2 mmol, 1.0 equiv) and *freshly* distilled TMEDA (8 mmol, 4.0 equiv) were dissolved in *freshly* distilled Et<sub>2</sub>O under argon. The solution was cooled to  $-78\text{ }^{\circ}\text{C}$  and *s*-BuLi (2.4 mmol, 1.2 equiv) was added slowly by means of a syringe, down the side of the flask, over a 10-min period. CH<sub>3</sub>OD (0.1 mL), stored over molecular sieves, was placed in an oven-dried vial and the vial was capped rapidly. At various time intervals (every 60 min), an aliquot



(ca 0.1 mL) of the deprotonating mixture was drawn using a syringe equipped with an oven-dried needle, and rapidly placed in the vial containing the CH<sub>3</sub>OD. The mixture was diluted with freshly distilled Et<sub>2</sub>O (ca 1 mL). The ethereal layer was filtered through Celite. The sample was placed in a GC vial and analyzed by GC-MS for deuterium incorporation using electron impact ionization.

When the deprotonation is complete, there is a noticeable shift of the molecular ion peak from m/z 185 for *N*-Boc-piperidine to m/z 186 for the singly deuterated *N*-Boc-piperidine.

### Checking for the extent of deprotonation of *N*-Boc-piperidine after 3 h at $-78\text{ }^{\circ}\text{C}$

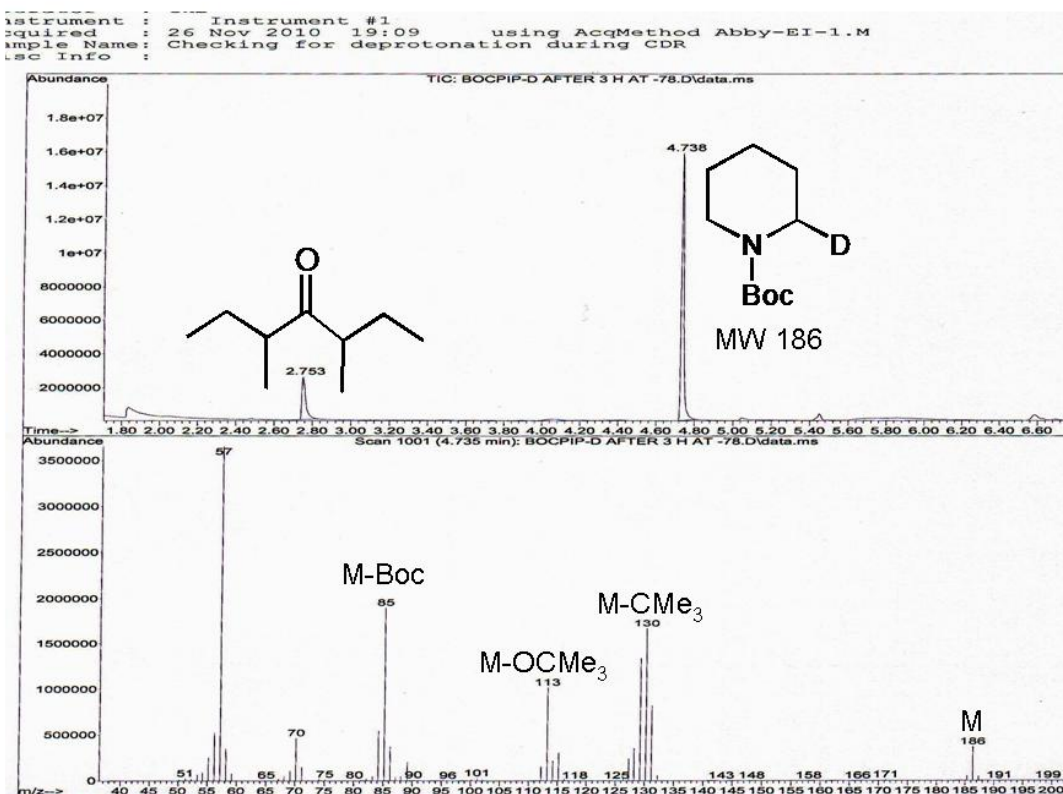

**Note 1:** We find that it is necessary to carry out the deprotonation at  $-78\text{ }^{\circ}\text{C}$ , in order to minimize attack of the Boc-group by *s*-BuLi. We routinely detect this byproduct by GC-MS (peak at 2.75 min) when checking for the extent of deprotonation.

*It is absolutely critical to ensure complete deprotonation of *N*-Boc-piperidine in order to maximize yield and enantioselectivity.*

GC-MS of byproduct formed by attack of the Boc-group by *s*-BuLi during deprotonation of *N*-Boc-piperidine

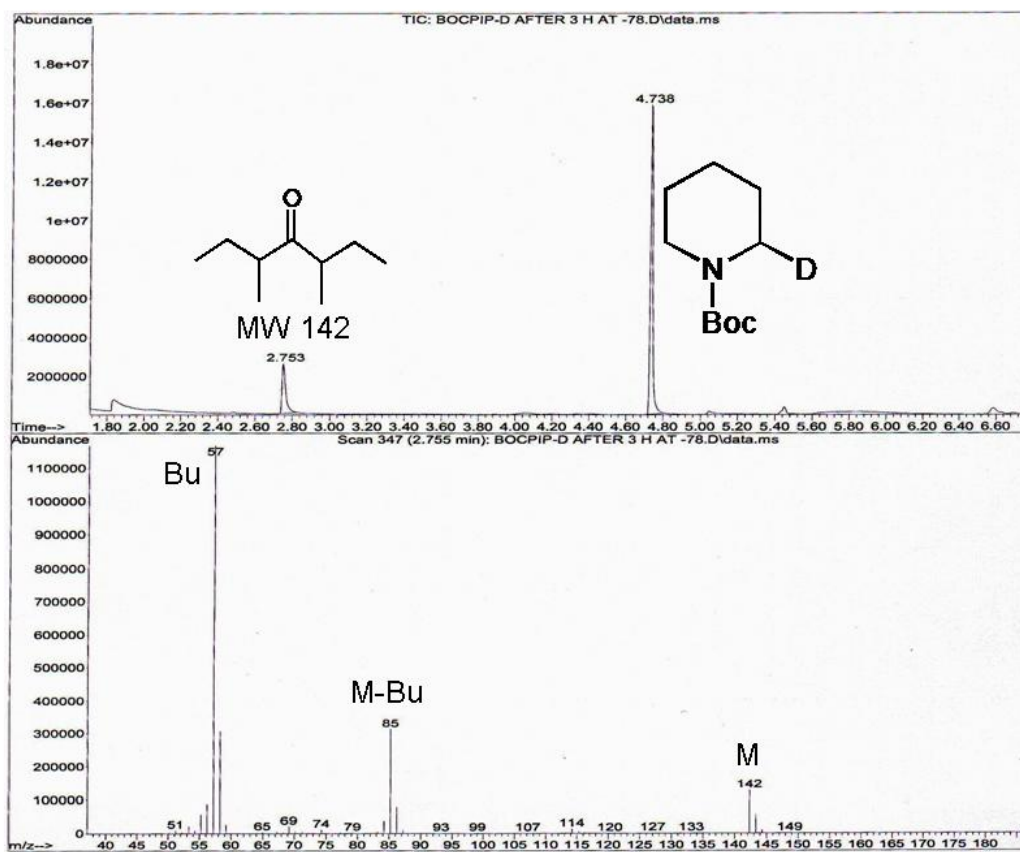

**Note 2:** The minimum requirement for a CDR to be operative is that the barrier to racemization must be significantly higher than the barrier to DTR.<sup>2a,b</sup> In collaboration with the Coldham group, we showed that the rates of racemization and DTR of *N*-Boc-2-lithiopiperidine **1** are both 1<sup>st</sup>-order in TMEDA up to one equivalent of the latter.<sup>2c</sup> Since excess TMEDA beneficially retards racemization and accelerates both DTR and CDR, we use four molar equivalents.

**B. General Procedure for Catalytic Dynamic Resolution (CDR) of 2-lithio-*N*-Boc-piperidine followed by Transmetalation and Negishi Cross Coupling with Heteroaryl halides.**

In an oven-dried, septum-capped 25 mL round bottom flask equipped with a stir bar, *freshly* distilled *N*-Boc-piperidine (2 mmol, 1.0 equiv) and *freshly* distilled TMEDA (8 mmol, 4.0 equiv) were dissolved in *freshly* distilled Et<sub>2</sub>O under argon. The solution was cooled to -78 °C and *s*-BuLi (2.4 mmol, 1.2 equiv) was added slowly by means of a syringe, down the side of the flask, over a ten minute period. The mixture was stirred for 3 h to effect deprotonation, affording *rac*-**1**·TMEDA. The extent of deprotonation was monitored by quenching an aliquot of the reaction mixture with methanol-d<sub>1</sub> (CH<sub>3</sub>OD) and checking for deuterium incorporation by GC-MS. *Freshly* distilled dilithiated diamino alcohol, precursor of (*S,S*)-**2** (0.1 mmol, 5 mol %) in Et<sub>2</sub>O was treated with *s*-BuLi (10 mol %). After complete deprotonation of *N*-Boc-piperidine as noted by GC-MS, the preformed alkoxide (*S,S*)-**2** was added and the flask was quickly transferred to a second thermostatted bath at -45 °C, and allowed to stir for 5 h. A solution of anhydrous ZnCl<sub>2</sub> (2.6 mmol in 2.6 mL THF, 1.0 M, 1.3 equiv), was added slowly over a ten minute period and the mixture was stirred for 30 minutes followed by warming to room temperature. After 30 minutes, the heteroaryl bromide, for example 3-bromopyridine (2.6 mmol, 1.3 equiv), Pd(OAc)<sub>2</sub> (0.08 mmol, 4 mol %) and *t*-Bu<sub>3</sub>P·HBF<sub>4</sub> (0.16 mmol, 8 mol %) were added sequentially. After stirring for 22 h at 60 °C, the mixture was cooled to room temperature and NH<sub>4</sub>OH (10 mL, 10% aqueous solution) was added dropwise and the mixture was stirred for 30 minutes. The resulting slurry was filtered through Celite and rinsed with 10 mL Et<sub>2</sub>O. The filtrate was washed with 1 M HCl<sub>(aq)</sub> (20 mL), then with water (2 x 10 mL), dried over Na<sub>2</sub>SO<sub>4</sub> and evaporated under reduced pressure to obtain the crude product. Purification by silica gel column chromatography was accompanied by er determination.

### 3. Optimization of the arylation of *N*-Boc-piperidine using bromobenzene

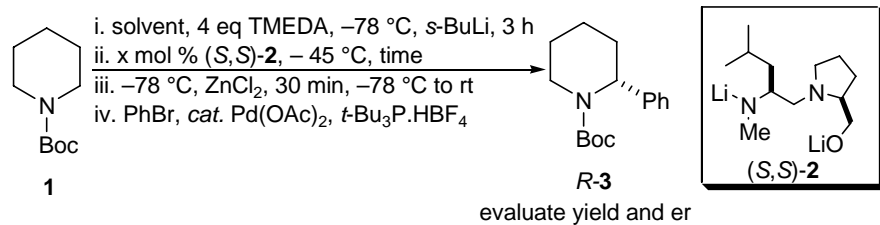

| Entry | Amount of (S,S)-2 (mol %) | Time (h) | Solvent           | Yield (%) of 3 | er (R:S) |
|-------|---------------------------|----------|-------------------|----------------|----------|
| 1     | 10                        | 3        | Et <sub>2</sub> O | 74             | 90:10    |
| 2     | 10                        | 3        | MTBE              | 65             | 86:14    |
| 3     | 5                         | 3        | Et <sub>2</sub> O | 70             | 93:7     |
| 4     | 5                         | 5        | Et <sub>2</sub> O | 68             | 96:4     |
| 5     | 5                         | 5        | MTBE              | 60             | 89:11    |
| 6     | 100                       | 3        | Et <sub>2</sub> O | 71             | 53:47    |

*R*-3 (96:4 er) from optimized CDR

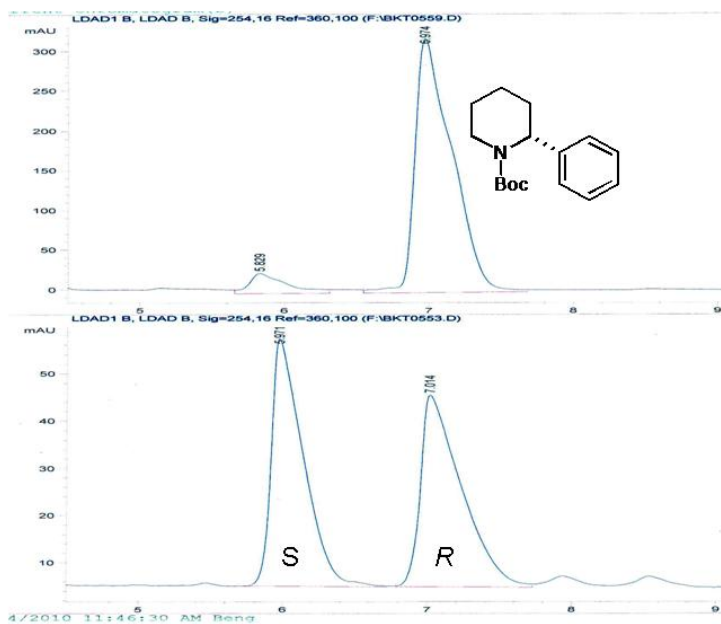

## 4.0. Variation of the Electrophile in the Arylation and Vinylation of *N*-Boc-piperidine

### 4.1. Electrophilic quench with phenyl bromide

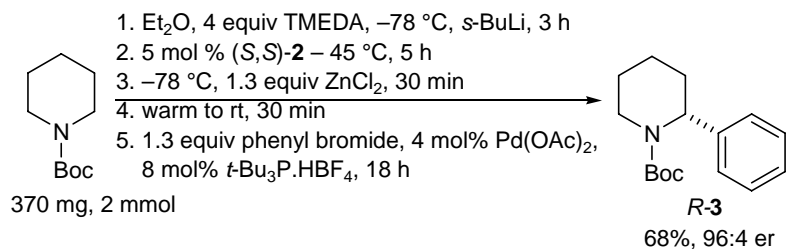

Using **General Procedure A**, *N*-Boc-piperidine (370 mg, 2.0 mmol), TMEDA (1.2 mL, 8.0 mmol, 4.0 equiv), Et<sub>2</sub>O (10 mL), *s*-BuLi (2.4 mL, 1.0 M, 2.4 mmol, 1.2 equiv), (*S,S*)-**2** (21.4 mg, 0.1 mmol, 5 mol%), in 0.40 mL Et<sub>2</sub>O pretreated with freshly titrated *s*-BuLi), ZnCl<sub>2</sub> (355 mg, 2.6 mmol, 1.3 equiv) in THF (2 mL), phenyl bromide (0.30 mL, 2.6 mmol, 1.3 equiv), Pd(OAc)<sub>2</sub> (20 mg, 0.08 mmol, 4 mol%) and *t*-Bu<sub>3</sub>P·HBF<sub>4</sub> (46 mg, 0.16 mmol, 8 mol%) gave the crude product as an oil. Purification by silica gel column chromatography eluting with Hexane/EtOAc (94:6) afforded 355 mg of the pure product as an oil in 68% yield and 96:4 er; spectroscopic data as reported.<sup>3</sup> [ $\alpha$ ]<sub>D</sub><sup>22</sup> +76.2 (*c* = 1, CHCl<sub>3</sub>), lit<sup>3b</sup>. for *R*-**3**; [ $\alpha$ ]<sub>D</sub><sup>25</sup> +83.7 (*c* = 0.98, CHCl<sub>3</sub>).

### 4.2. Electrophilic quench with *o*-toluyl bromide

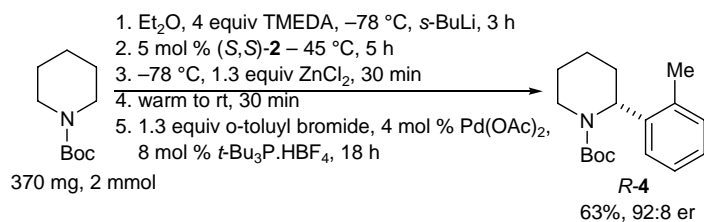

Using **General Procedure A**, *N*-Boc-piperidine (370 mg, 2.0 mmol), TMEDA (1.2 mL, 8.0 mmol, 4.0 equiv), Et<sub>2</sub>O (10 mL), *s*-BuLi (2.4 mL, 1.0 M, 2.4 mmol, 1.2 equiv), (*S,S*)-**2** (21.4 mg, 0.1 mmol, 5 mol%), in 0.40 mL Et<sub>2</sub>O pretreated with freshly titrated *s*-BuLi), ZnCl<sub>2</sub> (355 mg, 2.6 mmol, 1.3 equiv) in THF (2 mL), *o*-toluyl bromide (0.32 mL, 2.6 mmol, 1.3 equiv), Pd(OAc)<sub>2</sub> (20 mg, 0.08 mmol, 4 mol%) and *t*-Bu<sub>3</sub>P·HBF<sub>4</sub> (46 mg, 0.16 mmol, 8 mol%) gave the crude product as an oil. Purification by silica gel column chromatography eluting with Hexane/EtOAc (98:2) afforded 357 mg of the pure product as an oil in 63% yield and 92:8 er, [ $\alpha$ ]<sub>D</sub><sup>22</sup> +114.2 (*c* = 1, CHCl<sub>3</sub>). The er was determined by CSP-SFC as follows: **Column:** Pirkle-Whelk-O-1, **Flow Rate:** 2.0 mL/min, **Polarity Modifier %:** 2.0% EtOH, **Outlet Pressure = 150 psi**, **Oven Temperature = 35 °C**. The minor enantiomer elutes after ~3.9 min and the major enantiomer

elutes after ~4.5 min.  $^1\text{H}$  NMR (300 MHz,  $\text{CDCl}_3$ )  $\delta$  7.23-7.07 (m, 4H), 5.15 (br, s, 1H), 4.08-3.95 (m, 1H), 3.3-2.22 (m, 5H), 1.94-1.51(m, 5H), 1.42 (s, 9H);  $^{13}\text{C}$  NMR (75.5 MHz,  $\text{CDCl}_3$ )  $\delta$  155.0, 142.5, 134.5, 130.5, 126.6, 125.4, 125.1, 79.4, 52.5, 41.2, 28.8, 28.4, 25.8, 19.3, 18.2.

#### 4.2b. Synthesis of S-4

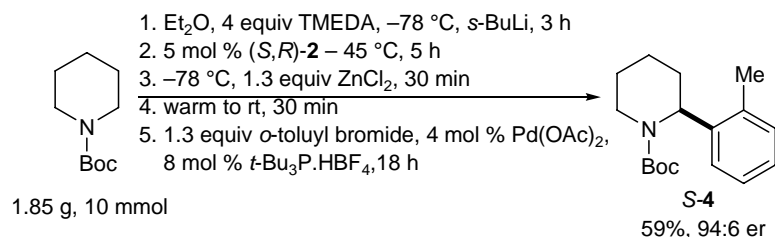

Using **General Procedure A**, *N*-Boc-piperidine (1.85 g, 10.0 mmol), TMEDA (6 mL, 40 mmol, 4.0 equiv),  $\text{Et}_2\text{O}$  (50 mL), *s*-BuLi (12 mL, 1.0 M, 12 mmol, 1.2 equiv), (*S,R*)-**2** (107 mg, 0.5 mmol, 5 mol %), in 2.0 mL  $\text{Et}_2\text{O}$  pretreated with freshly titrated *s*-BuLi),  $\text{ZnCl}_2$  solution (13 mL, 1.0 M in  $\text{Et}_2\text{O}$ , 13 mmol, 1.3 equiv), *o*-toluyl bromide (1.6 mL, 12 mmol, 1.3 equiv),  $\text{Pd(OAc)}_2$  (100 mg, 0.4 mmol, 4 mol %) and *t*-Bu<sub>3</sub>P·HBF<sub>4</sub> (230 mg, 0.8 mmol, 8 mol %) afforded 1.67 g of **S-4** as an oil in 59% yield and 94:6 er,  $[\alpha]_{\text{D}}^{22} -118.6$  ( $c = 1$ ,  $\text{CHCl}_3$ ).

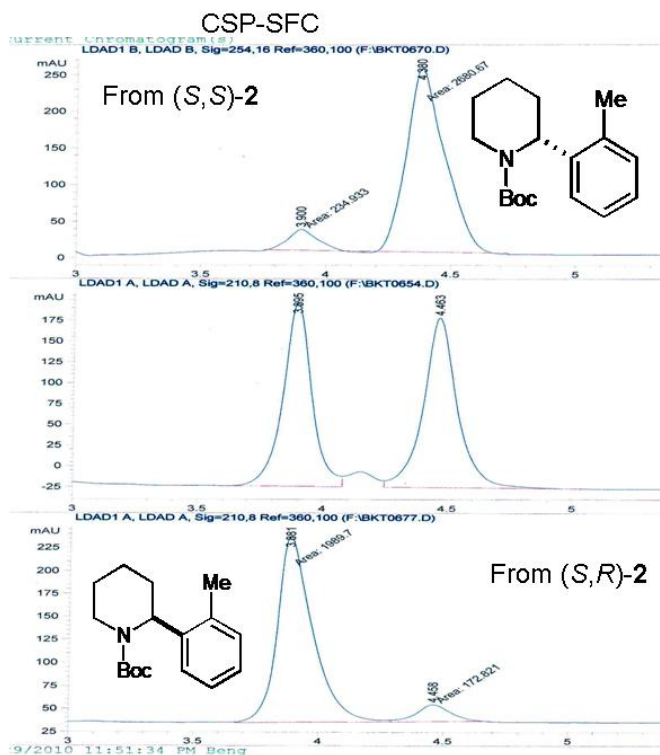

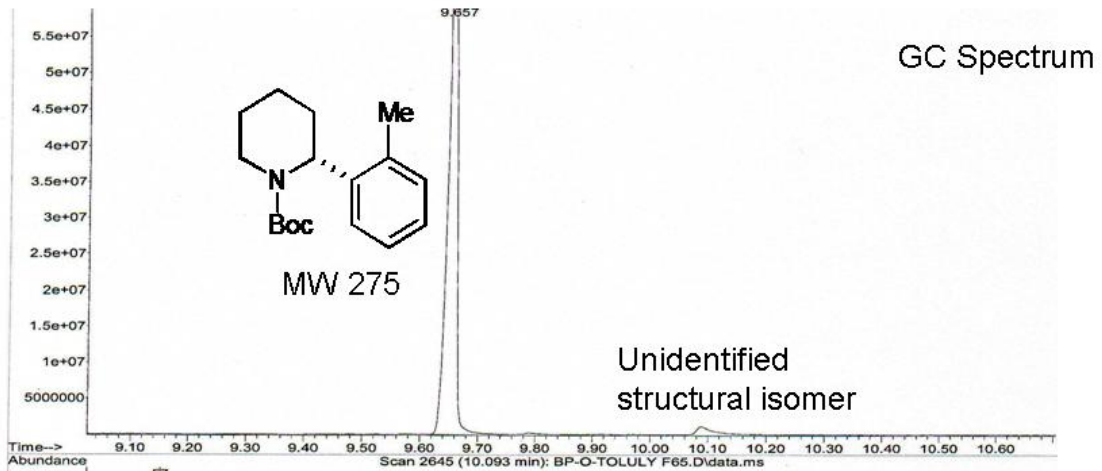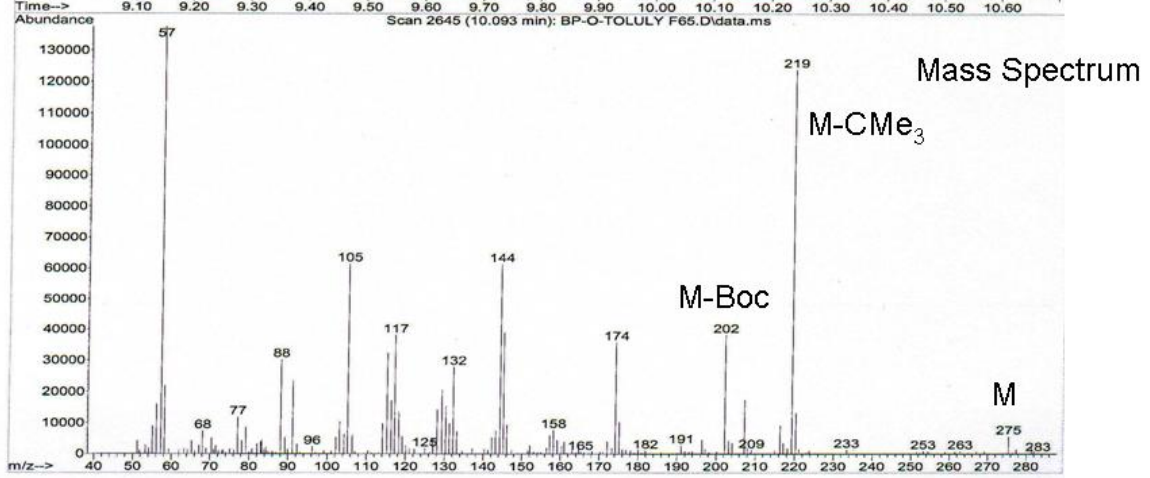

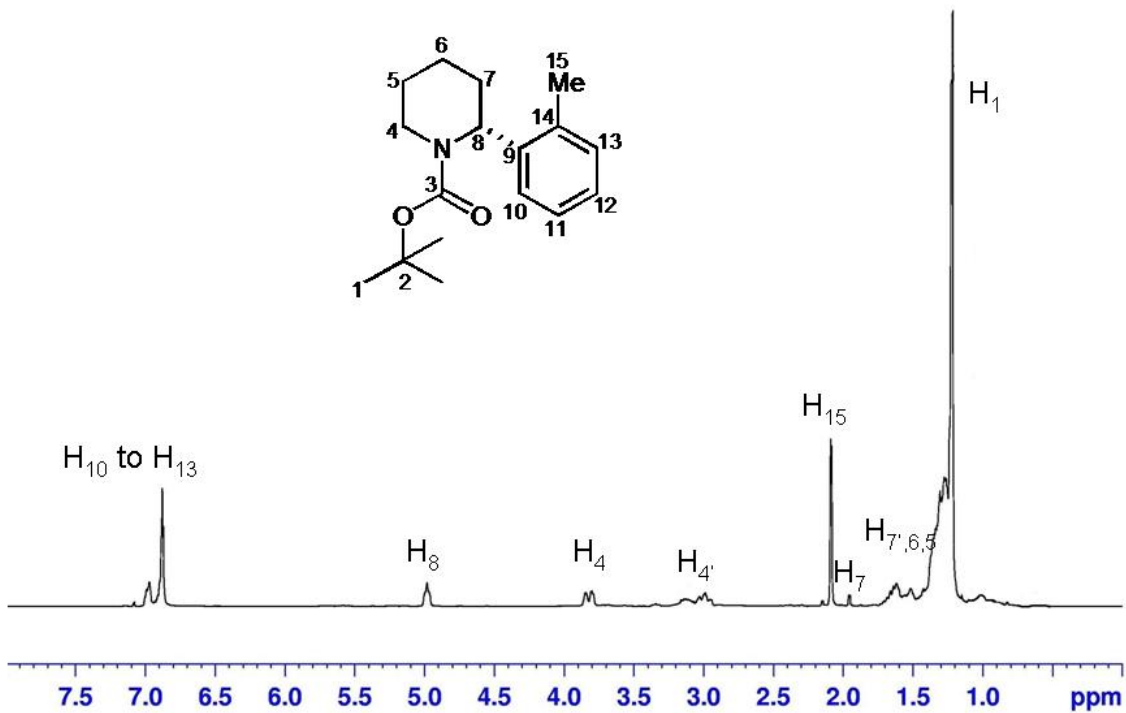



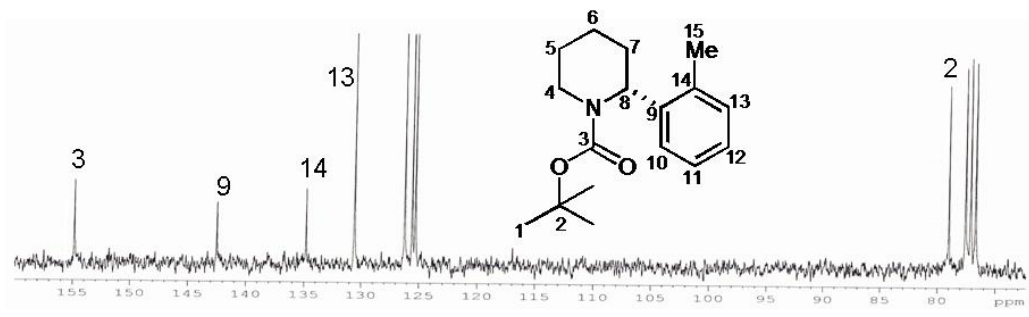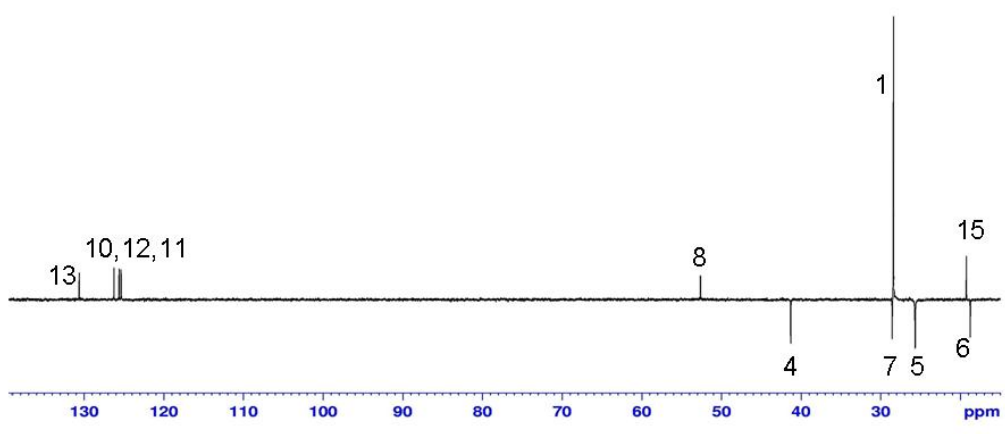

HMQC

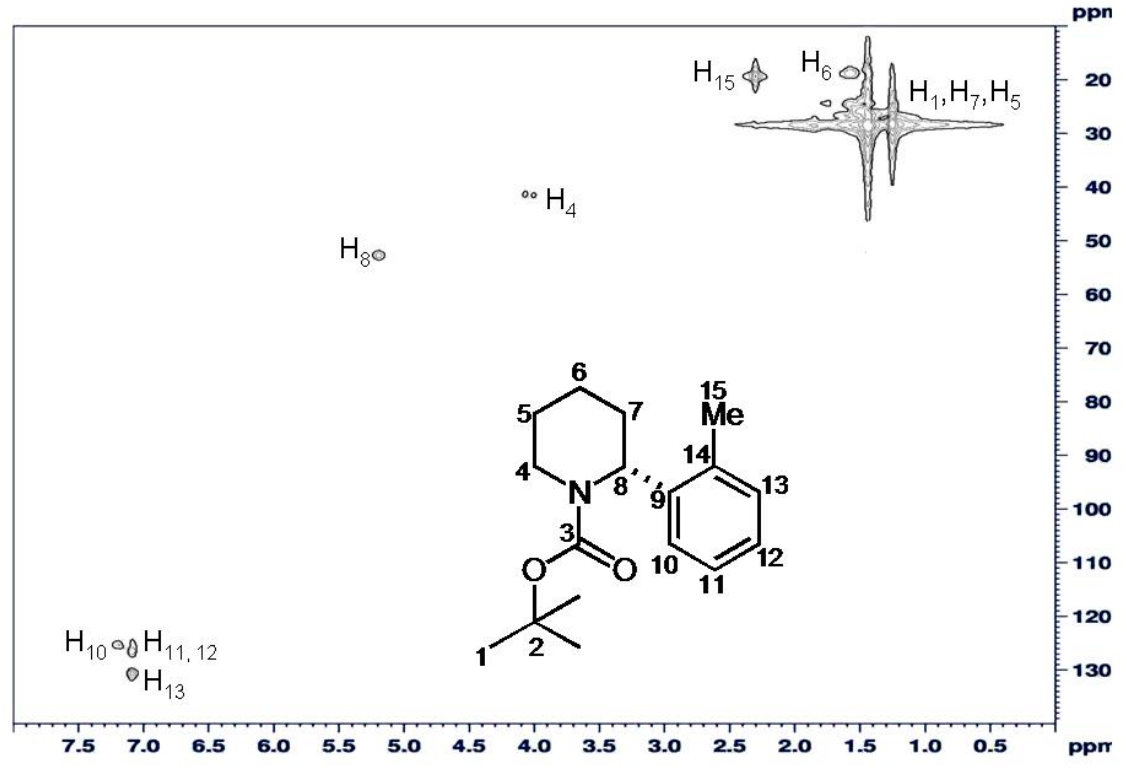

### 4.3. Electrophilic quench with 4-bromoveratrole: Synthesis of *R*-5

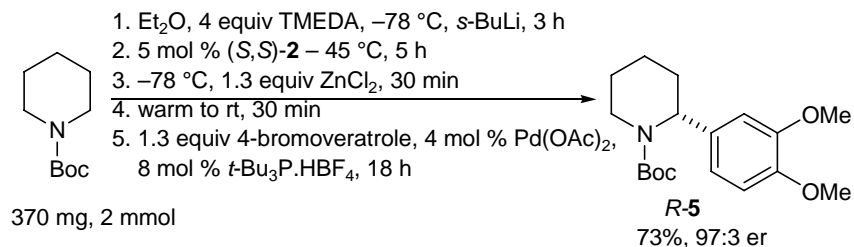

Using **General Procedure A**, *N*-Boc-piperidine (370 mg, 2.0 mmol), TMEDA (1.2 mL, 8.0 mmol, 4.0 equiv), Et<sub>2</sub>O (10 mL), *s*-BuLi (2.4 mL, 1.0 M, 2.4 mmol, 1.2 equiv), (*S,S*)-**2** (21.4 mg, 0.1 mmol, 5 mol %), in 0.40 mL Et<sub>2</sub>O pretreated with freshly titrated *s*-BuLi), ZnCl<sub>2</sub> (355 mg, 2.6 mmol, 1.3 equiv) in THF (2 mL), 4-bromoveratrole (0.38 mL, 2.6 mmol, 1.3 equiv), Pd(OAc)<sub>2</sub> (20 mg, 0.08 mmol, 4 mol %) and *t*-Bu<sub>3</sub>P·HBF<sub>4</sub> (46 mg, 0.16 mmol, 8 mol %) gave the crude product as an oil. Purification by silica gel column chromatography eluting with Hexane/EtOAc (85:15) afforded 482 mg of the pure product as an oil in 75% yield and 97:3 er; spectroscopic data as reported.<sup>5</sup> [ $\alpha$ ]<sub>D</sub><sup>22</sup> +106.2 (*c* = 1.0, CHCl<sub>3</sub>), lit<sup>5</sup>. for *S*-**5** of 82:18 er ([ $\alpha$ ]<sub>D</sub><sup>20</sup> -49.6 (*c* = 0.275, CHCl<sub>3</sub>)). The er was determined by CSP-SFC as follows: **Column:** Pirkle-Whelk-O-1, **Flow Rate:** 3.0 mL/min, **Polarity Modifier %:** 3.0% EtOH, Outlet Pressure = **150 psi**, **Oven Temperature** = 35 °C. The minor enantiomer elutes after ~6.2 min and the major enantiomer elutes after ~7.2 min. <sup>1</sup>H NMR (300 MHz, CDCl<sub>3</sub>)  $\delta$  6.85-6.70 (m, 3H), 5.35 (br, s, 1H), 4.08-3.99 (m, 1H), 3.88-3.86 (m, 6H), 2.65 (m, 1H), 2.33-2.22 (m, 1H), 1.94-1.81 (m, 1H), 1.66-1.52 (m, 4H), 1.48 (s, 9H); <sup>13</sup>C NMR (75.5 MHz, CDCl<sub>3</sub>)  $\delta$  155.6, 149.1, 147.5, 132.8, 118.6, 111.0, 109.9, 79.5, 55.83, 55.77, 52.7, 40.0, 28.4, 27.9, 25.5, 19.4.

# CSP-SFC

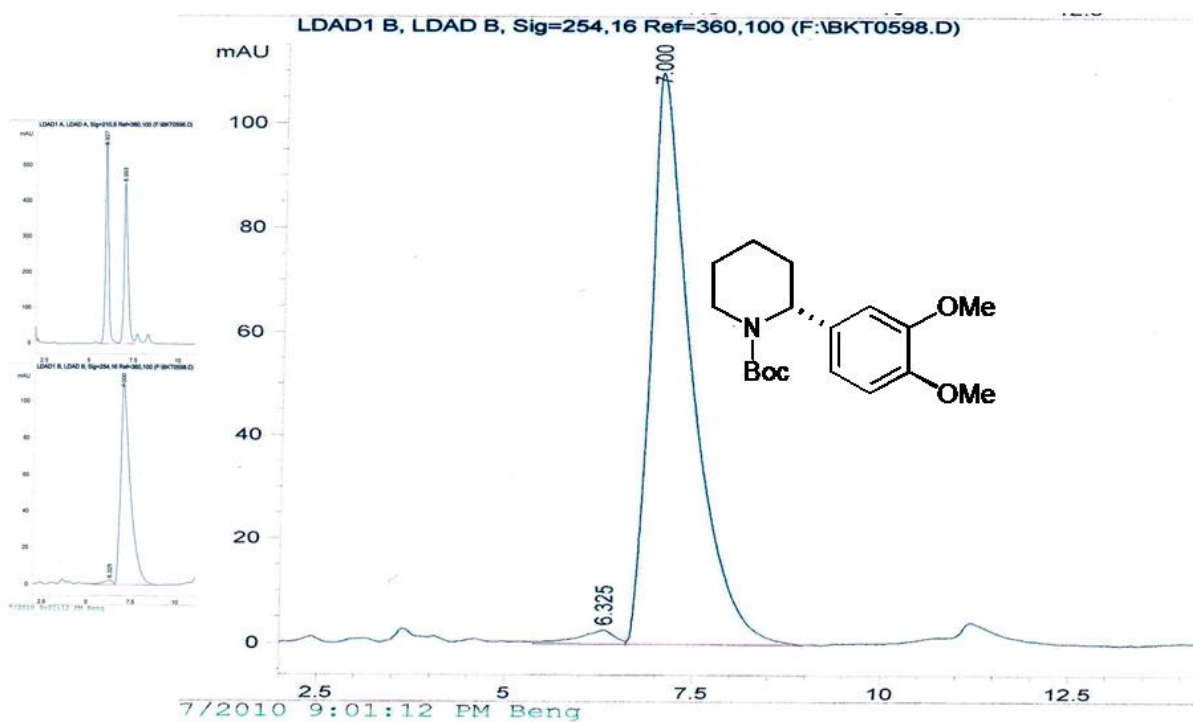

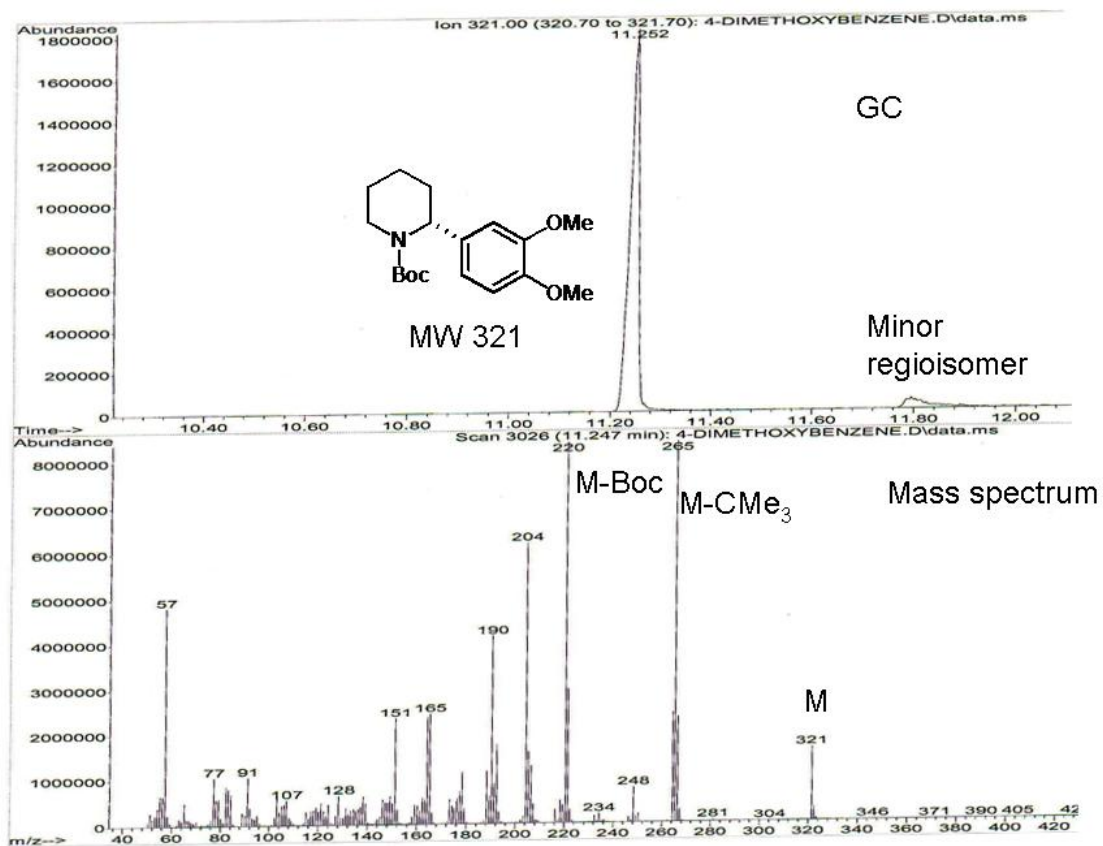

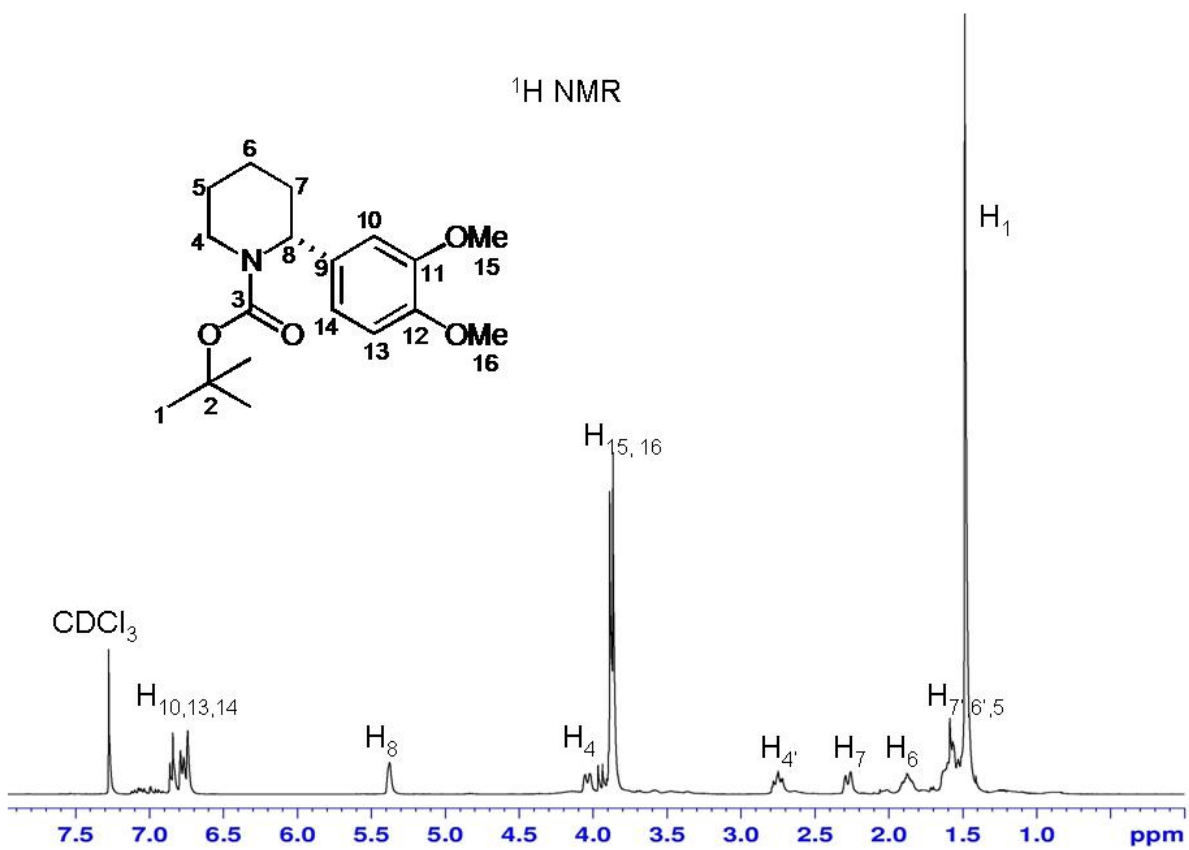

See full assignments on HMQC

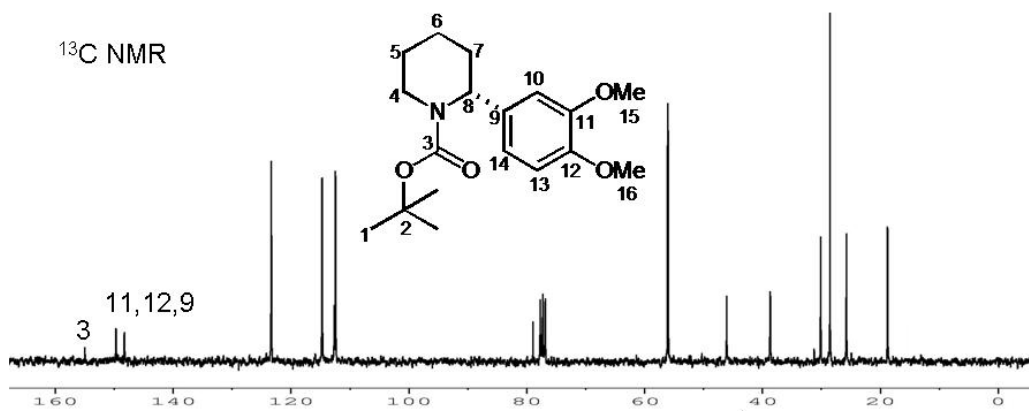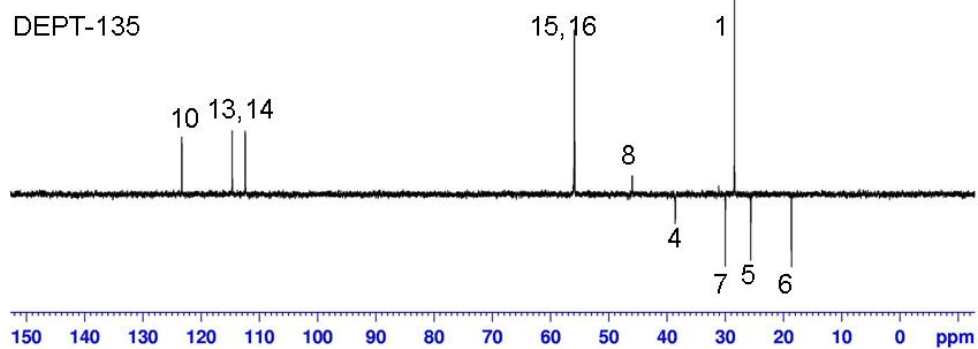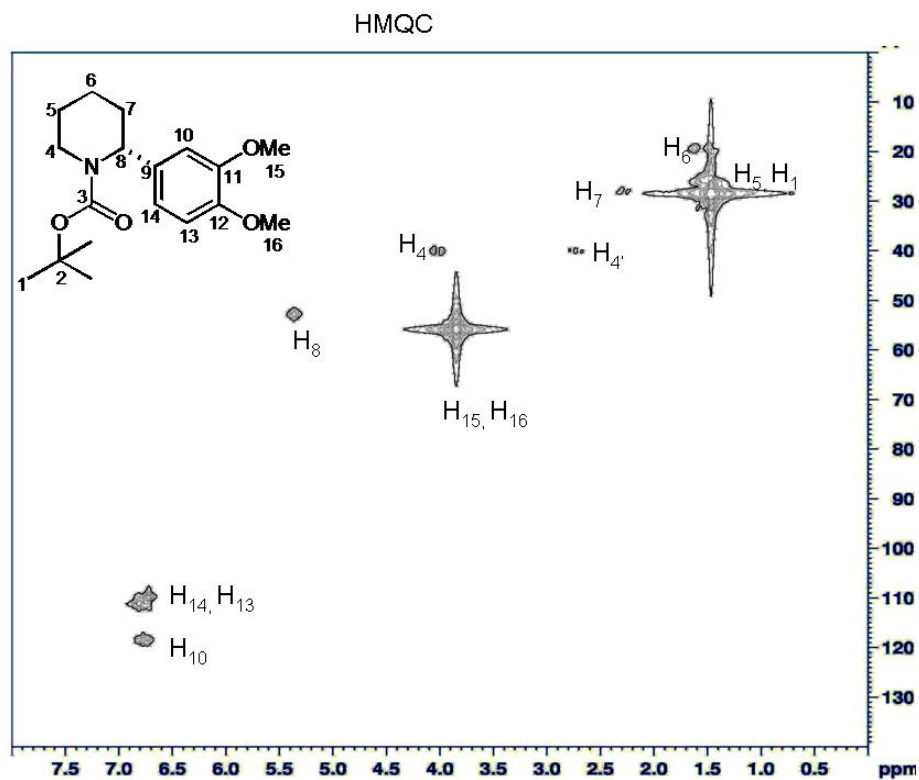

#### 4.4. Electrophilic quench with *p*-bromo-*tert*-butylbenzene: Synthesis of *R*-6

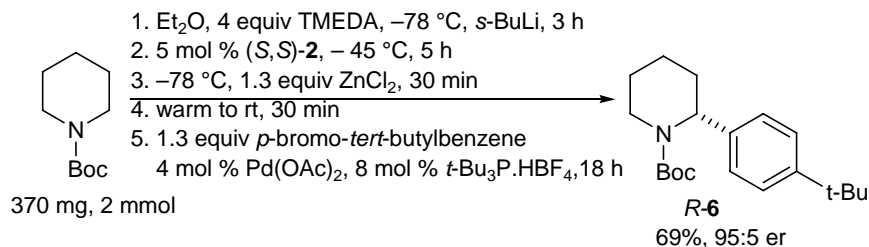

Using **General Procedure A**, *N*-Boc-piperidine (370 mg, 2.0 mmol), TMEDA (1.2 mL, 8.0 mmol, 4.0 equiv), Et<sub>2</sub>O (10 mL), *s*-BuLi (2.4 mL, 1.0 M, 2.4 mmol, 1.2 equiv), (*S,S*)-**2** (21.4 mg, 0.1 mmol, 5 mol %), in 0.40 mL Et<sub>2</sub>O pretreated with freshly titrated *s*-BuLi), ZnCl<sub>2</sub> (355 mg, 2.6 mmol, 1.3 equiv) in THF (2 mL), *p*-bromo-*tert*-butylbenzene (0.43 mL, 2.6 mmol, 1.3 equiv), Pd(OAc)<sub>2</sub> (20 mg, 0.08 mmol, 4 mol %) and *t*-Bu<sub>3</sub>P·HBF<sub>4</sub> (46 mg, 0.16 mmol, 8 mol %) gave the crude product as an oil. Purification by silica gel column chromatography eluting with Hexane/EtOAc (99:1) afforded 437 mg of the pure product as an oil in 69% yield and 95:5 er; [α]<sub>D</sub><sup>22</sup> +104.4 (*c* = 1, CHCl<sub>3</sub>). The er was determined by CSP-SFC as follows: **Column**: Daicel Chiralcel OD-H, **Flow Rate** = 2.0 mL/min, **Polarity Modifier** = 3.0% EtOH. The minor enantiomer elutes after ~3.8 min and the major enantiomer elutes after ~4.7 min. <sup>1</sup>H NMR (300 MHz, CDCl<sub>3</sub>) δ 7.4-7.3 (d, 2H), 7.2-7.1 (d, 2H), 5.4 (br, s, 1H), 4.1-3.98 (m, 1H), 2.85-2.7 (m, 1H), 2.34-2.25 (m, 1H), 1.92-1.57 (m, 5H) 1.48 (s, 9H), 1.25 (s, 9H); <sup>13</sup>C NMR (75.5 MHz, CDCl<sub>3</sub>) δ 155.6, 149.1, 137.1, 126.2, 125.4, 79.4, 52.9, 40.0, 34.3, 31.4, 28.5, 27.9, 25.6, 19.5.

**CAUTION:** *p*-bromo-*tert*-butylbenzene has a very strong odor.

# CSP-SFC

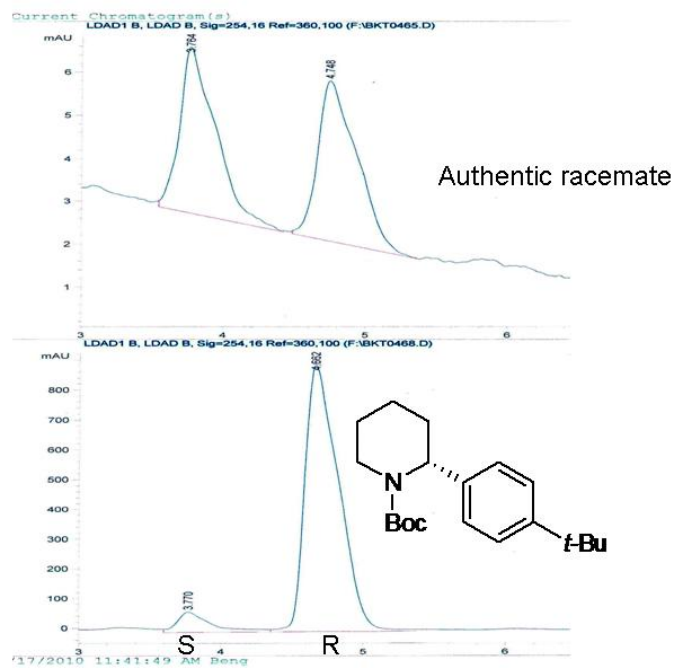



File :C:\Documents and Settings\Administrator\Desktop\Gawley metho  
... s sequence\BENG\ARYLATION-MESITYLENE.D\4-TERT-BU-BZ F45.D  
Operator : tkb  
Instrument : Instrument #1  
Acquired : 15 Sep 2010 18:01 using AcqMethod drug test method.M  
Sample Name: f45  
Misc Info :

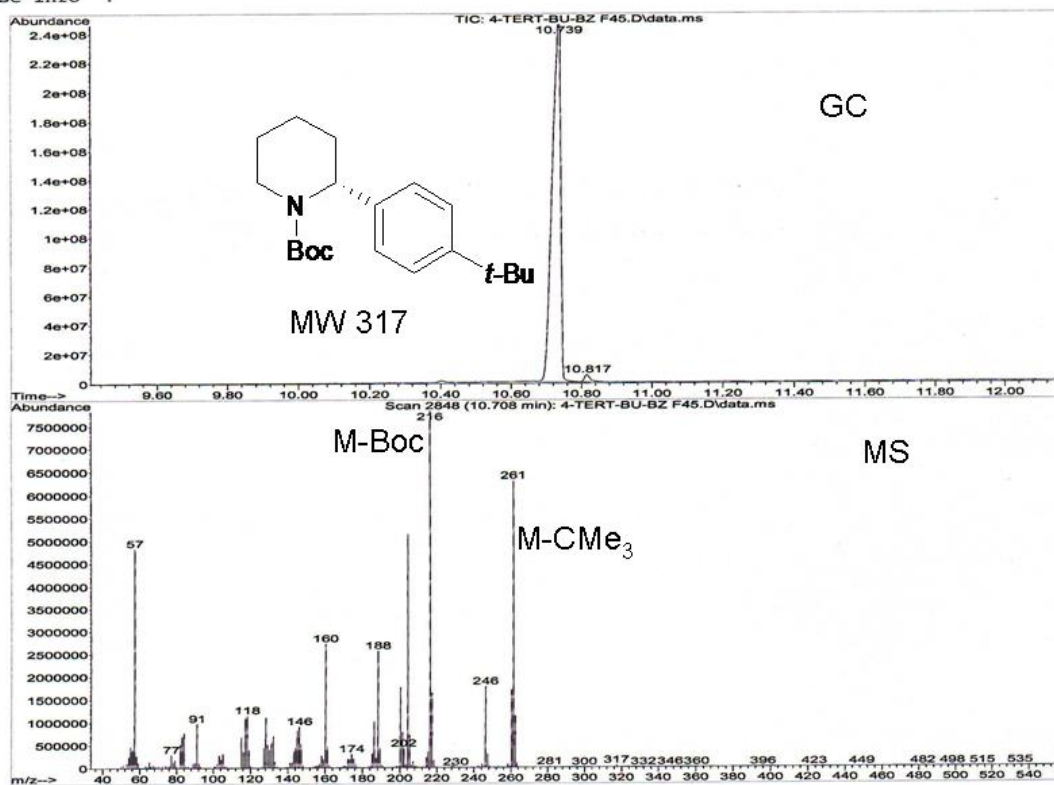

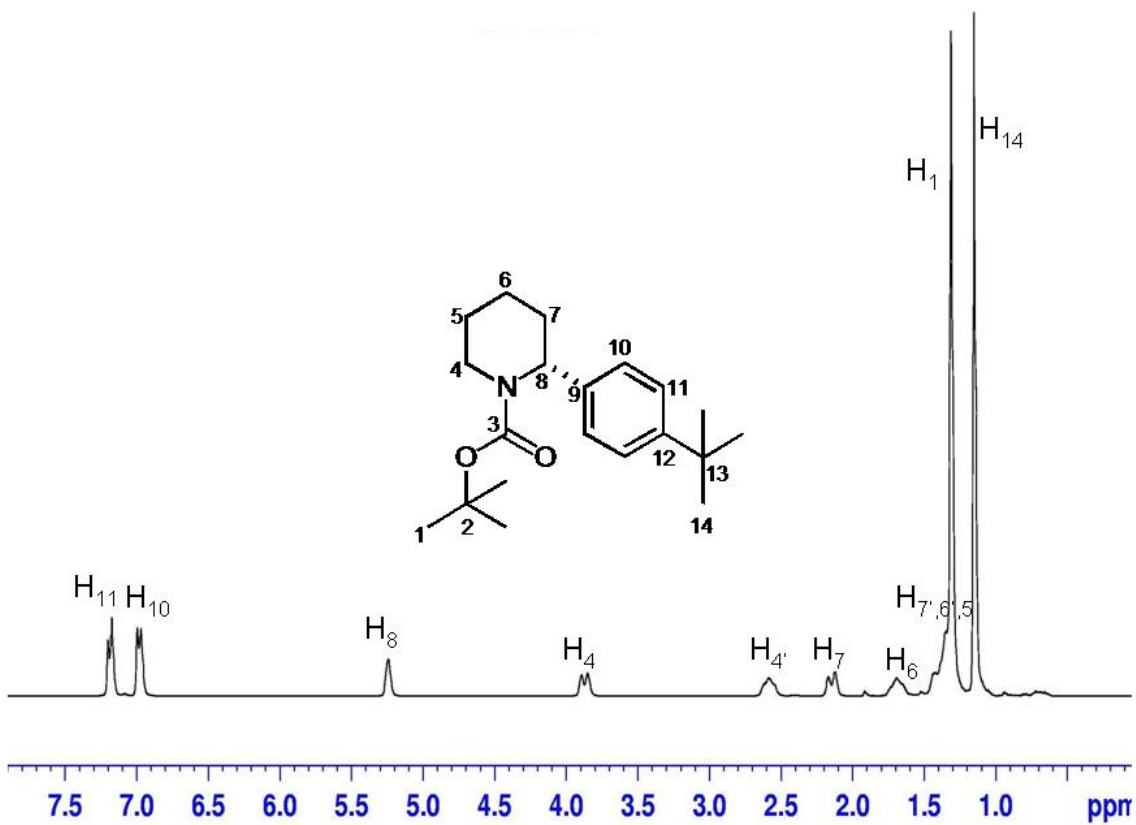

See full assignments on HMQC

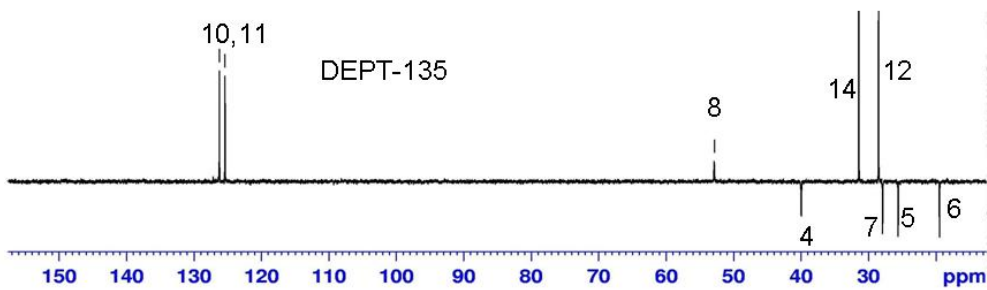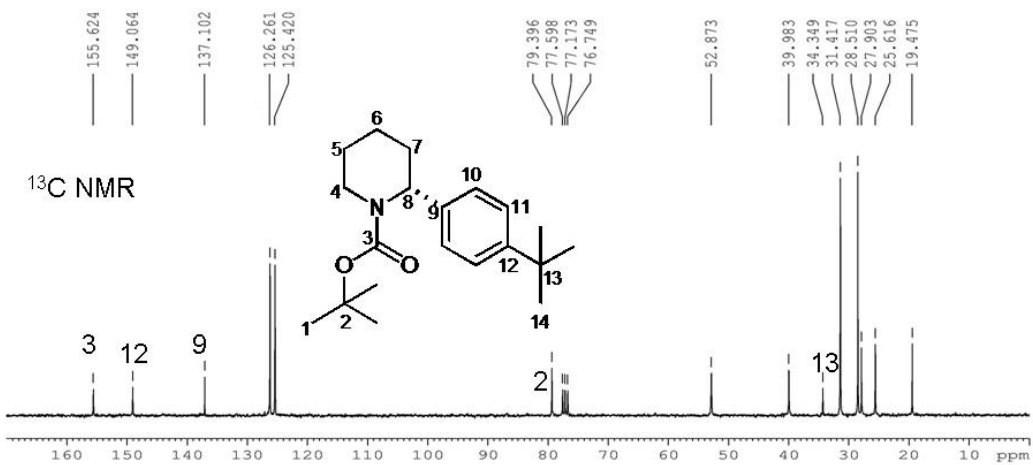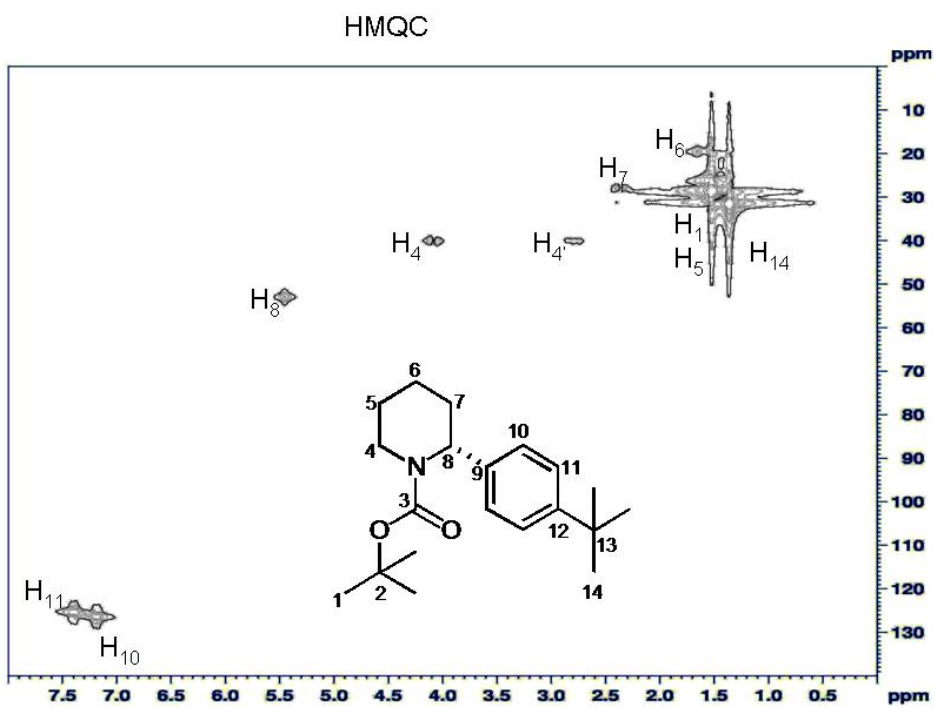

#### 4.5. Electrophilic quench with 2-bromomesitylene: Synthesis of *R*-7

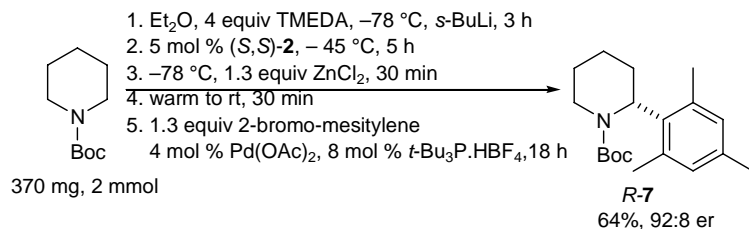

Using **General Procedure A**, *N*-Boc-piperidine (370 mg, 2.0 mmol), TMEDA (1.2 mL, 8.0 mmol, 4.0 equiv), Et<sub>2</sub>O (10 mL), *s*-BuLi (2.4 mL, 1.0 M, 2.4 mmol, 1.2 equiv), (*S,S*)-**2** (21.4 mg, 0.1 mmol, 5 mol %), in 0.40 mL Et<sub>2</sub>O pretreated with freshly titrated *s*-BuLi), ZnCl<sub>2</sub> (355 mg, 2.6 mmol, 1.3 equiv) in THF (2 mL), 2-bromomesitylene (517 mg, 2.6 mmol, 1.3 equiv), Pd(OAc)<sub>2</sub> (20 mg, 0.08 mmol, 4 mol %) and *t*-Bu<sub>3</sub>P·HBF<sub>4</sub> (46 mg, 0.16 mmol, 8 mol %) gave the crude product as an oil. Purification by silica gel column chromatography eluting with Hexane/EtOAc (85:15) afforded 388 mg of the pure product as an oil in 64% yield and 92:8 er; [ $\alpha$ ]<sub>D</sub><sup>22</sup> +97.1 (*c* = 1, CHCl<sub>3</sub>) The er was determined by CSP-SFC as follows: **Column:** Pirkle-Whelk-O-1, **Flow Rate:** 2.0 mL/min, **Polarity Modifier %:** 2.0% EtOH, **Outlet Pressure = 150 psi**, **Oven Temperature = 35 °C**. The minor enantiomer elutes after ~5.7 min and the major enantiomer elutes after ~6.5 min.

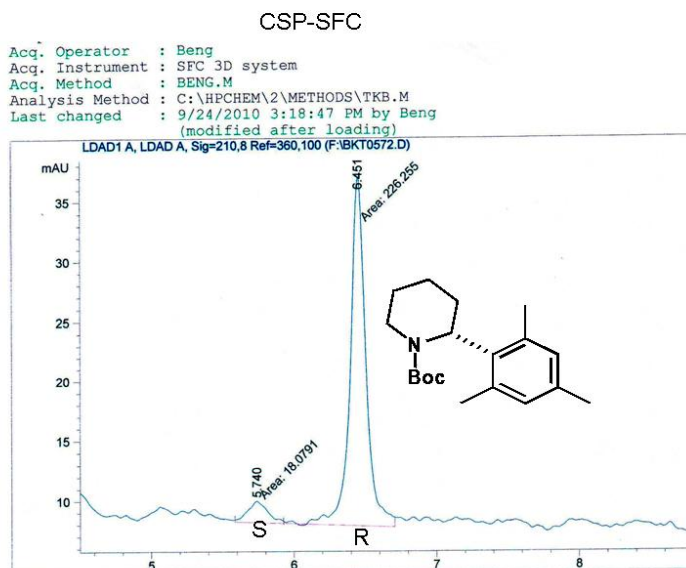

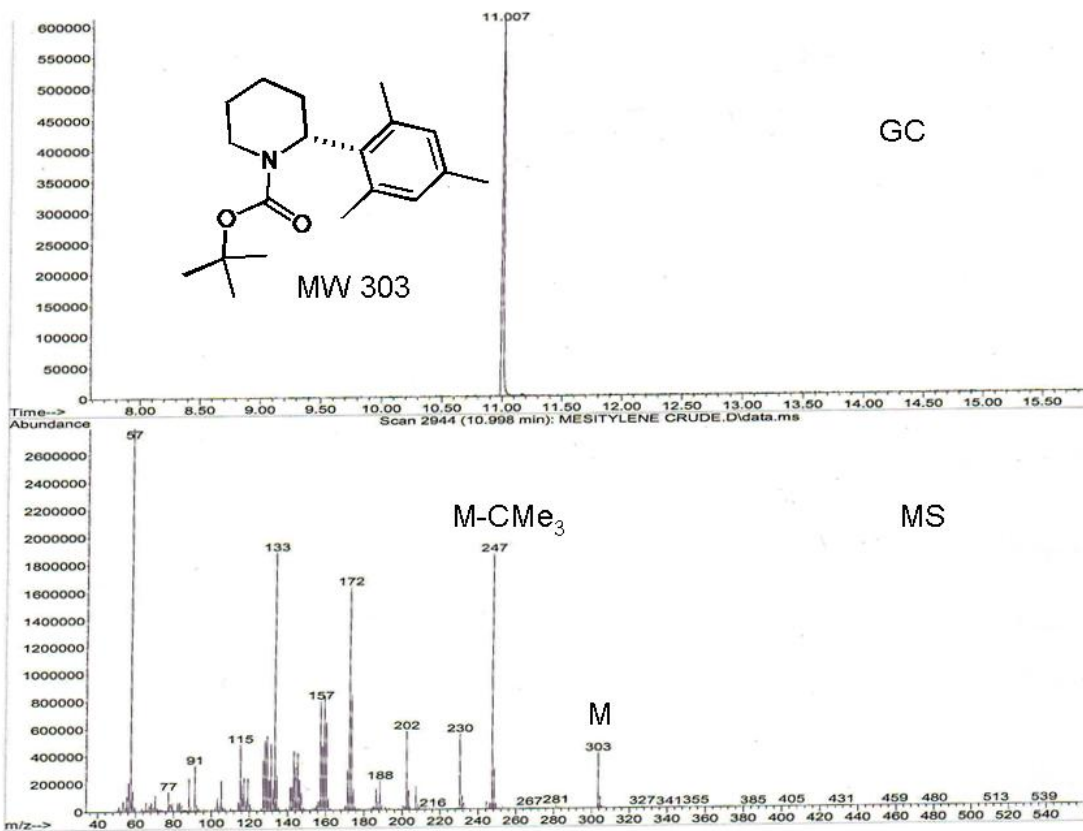

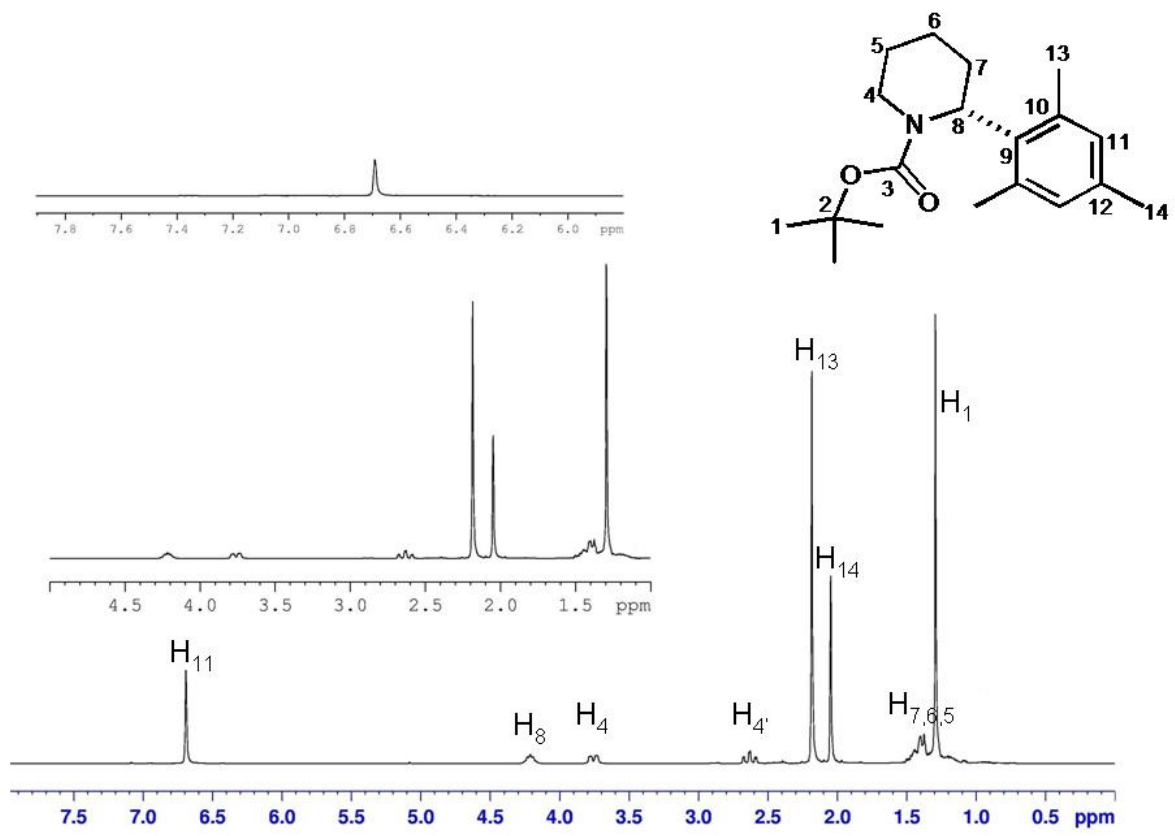

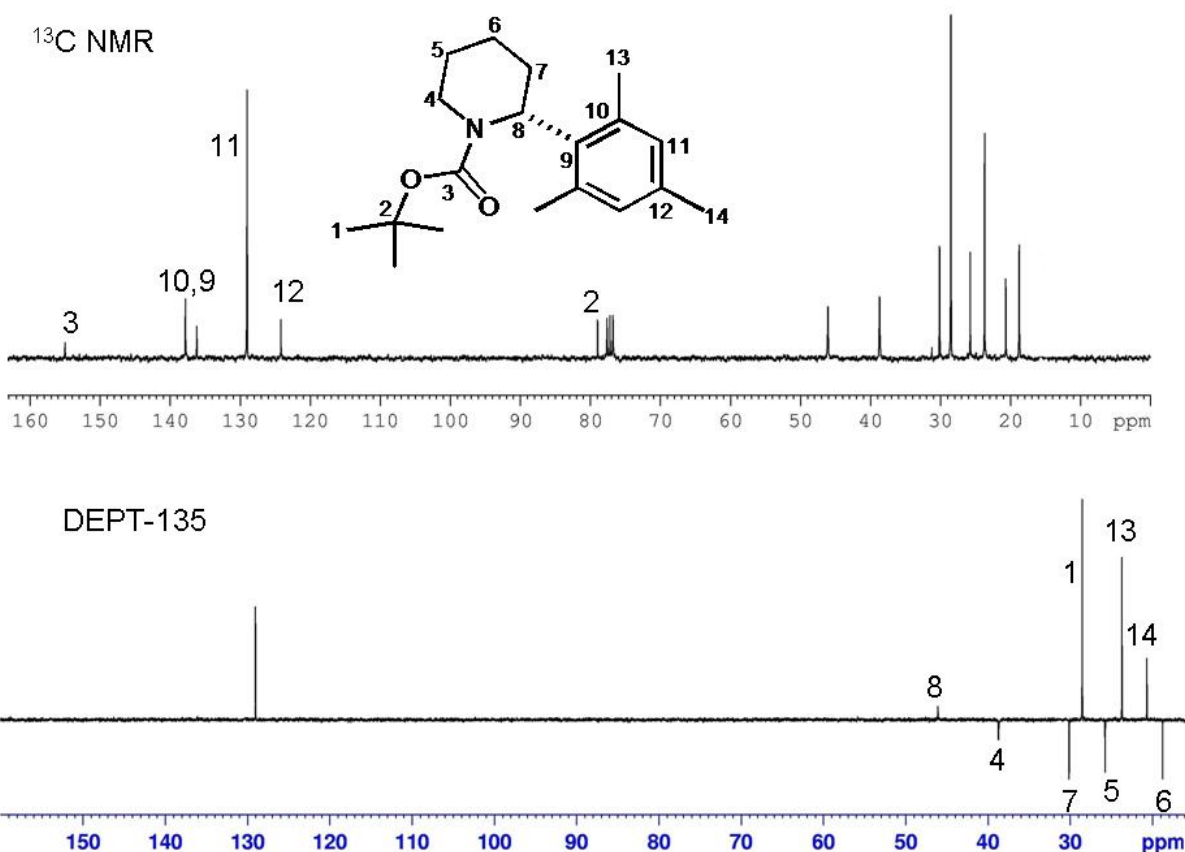

#### 4.6. Electrophilic quench with *p*-bromoacetophenone: Synthesis of *R*-8

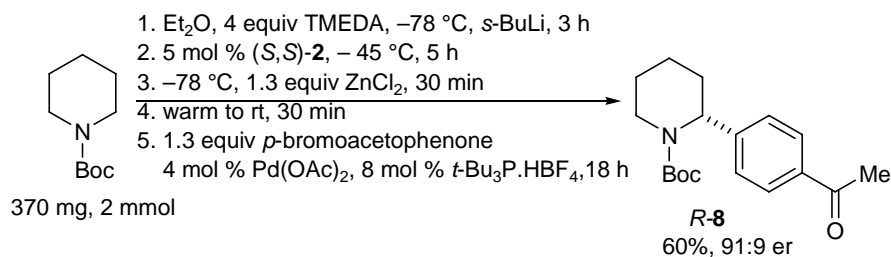

Using **General Procedure A**, *N*-Boc-piperidine (370 mg, 2.0 mmol), TMEDA (1.2 mL, 8.0 mmol, 4.0 equiv), Et<sub>2</sub>O (10 mL), *s*-BuLi (2.4 mL, 1.0 M, 2.4 mmol, 1.2 equiv), (*S,S*)-**2** (21.4 mg, 0.1 mmol, 5 mol %), in 0.40 mL Et<sub>2</sub>O pretreated with freshly titrated *s*-BuLi, ZnCl<sub>2</sub> (355 mg, 2.6 mmol, 1.3 equiv) in THF (2 mL), 4-bromoacetophenone (517 mg, 2.6 mmol, 1.3 equiv), Pd(OAc)<sub>2</sub> (20 mg, 0.08 mmol, 4 mol %) and *t*-Bu<sub>3</sub>P·HBF<sub>4</sub> (46 mg, 0.16 mmol, 8 mol %) gave the crude product as an oil. Purification by silica gel column chromatography eluting with Hexane/EtOAc (80:20) afforded 364 mg of the pure product as an oil in 60% yield and 91:9 er; [α]<sub>D</sub><sup>22</sup> +126.5 (*c* = 1, CHCl<sub>3</sub>) The er was determined by CSP-SFC as follows: **Column:** Pirkle-

Whelk-O-1, **Flow Rate:** 3.0 mL/min, **Polarity Modifier %:** 3.0% EtOH, Outlet Pressure = **150 psi**, **Oven Temperature** = 35 °C. The minor enantiomer elutes after ~6.5 min and the major enantiomer elutes after ~7.0 min. <sup>1</sup>H NMR (300 MHz, CDCl<sub>3</sub>) δ 7.95-7.90 (d, 2H), .7.83-7.78 (d, 2H), 5.45 (br, s, 1H), 4.15-4.08 (m, 1H), 2.82-2.71 (m, 1H), 2.60 (s, 3H); 2.32-2.27 (m, 1H), 1.92-1.57 (m, 5H) 1.48 (s, 9H), <sup>13</sup>C NMR (75.5 MHz, CDCl<sub>3</sub>) δ 197.5, 155.6, 146.5, 135.4, 128.7, 126.7, 79.9, 53.4, 40.3, 28.4, 28.3, 26.6, 25.2, 19.4.

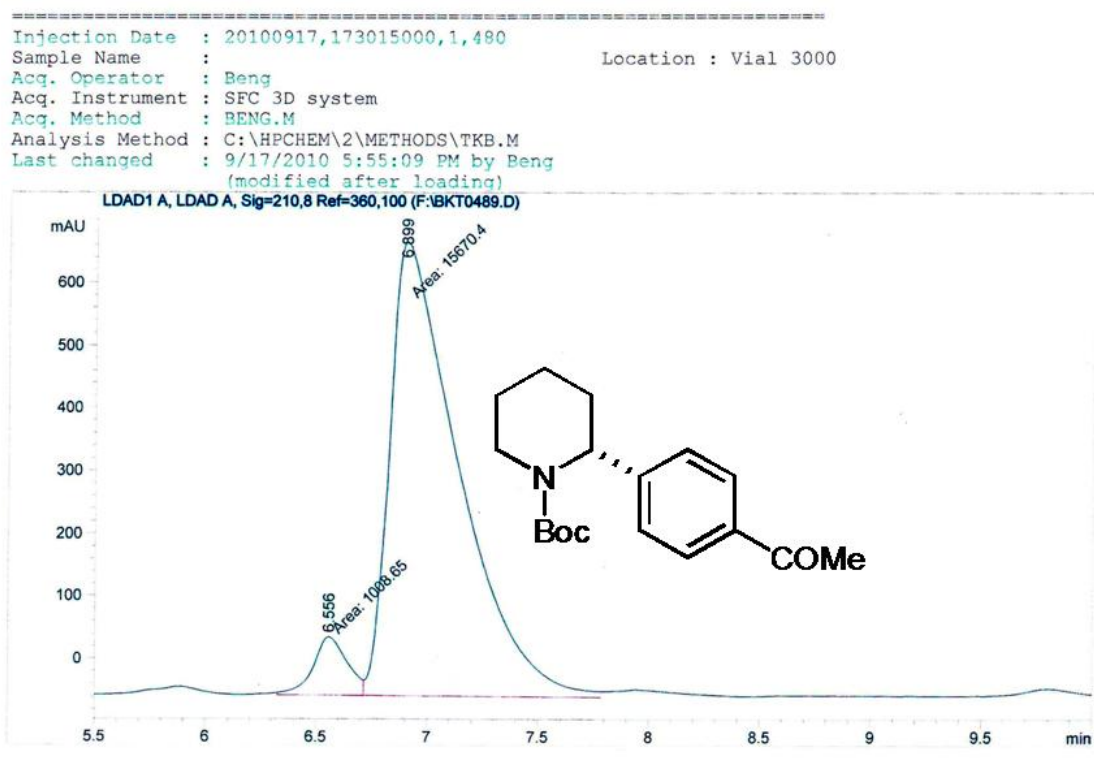



File : C:\Documents and Settings\Administrator\Desktop\Gawley metho  
... s sequence\BENG\ARYLATION-MESITYLENE.D\4-ACETOPH F25.D  
Operator : tkb  
Instrument : Instrument #1  
Acquired : 17 Sep 2010 13:36 using AcqMethod drug test method.M  
Sample Name: f25  
Misc Info :

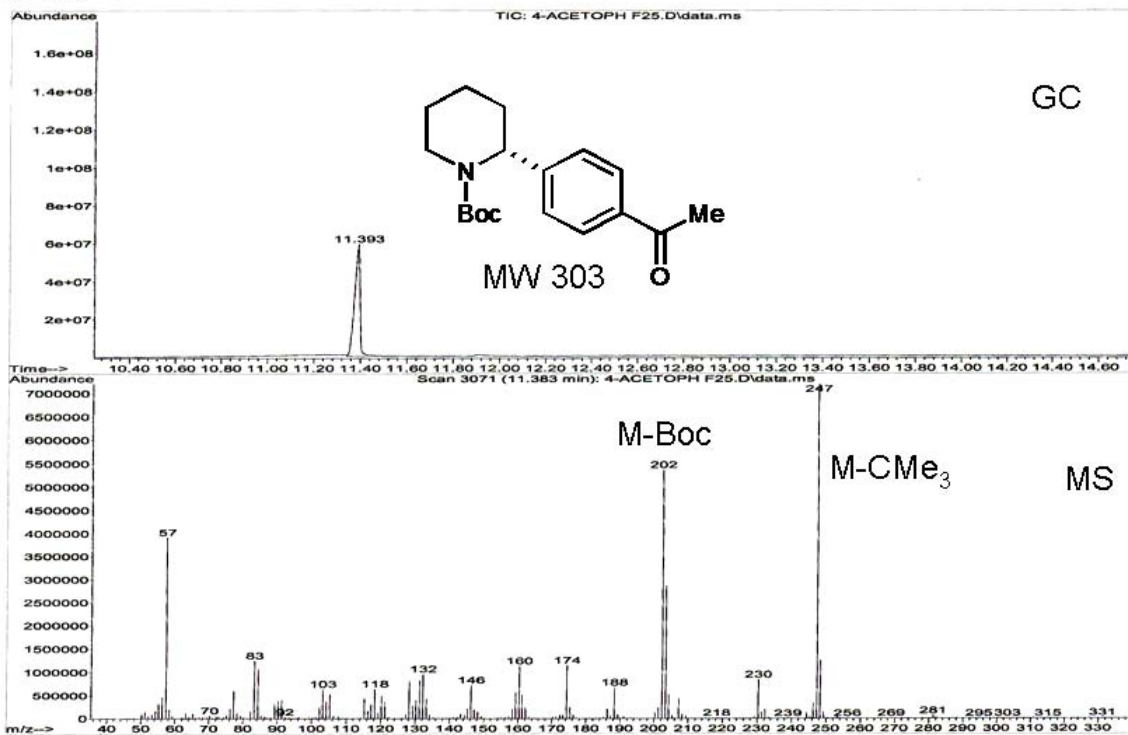

1H NMR

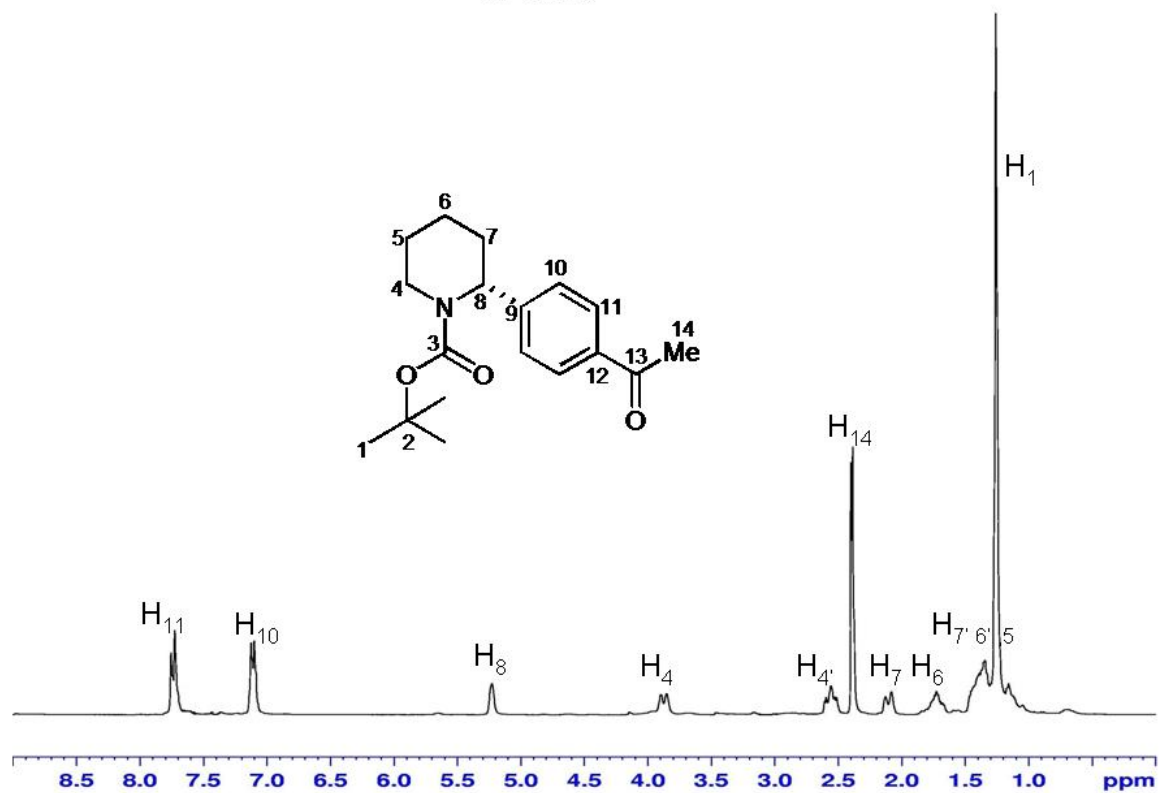

See full assignments on HMQC

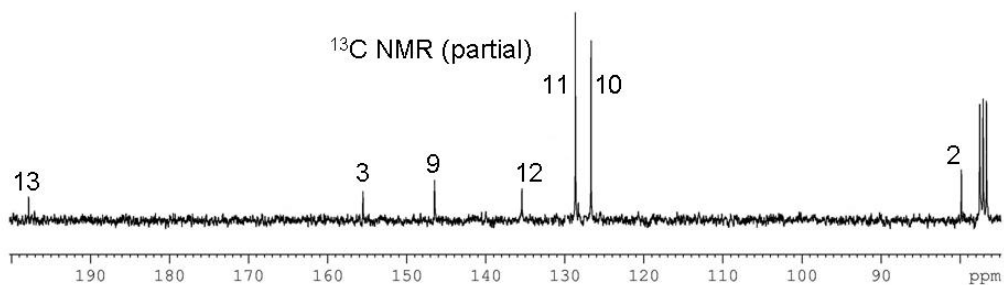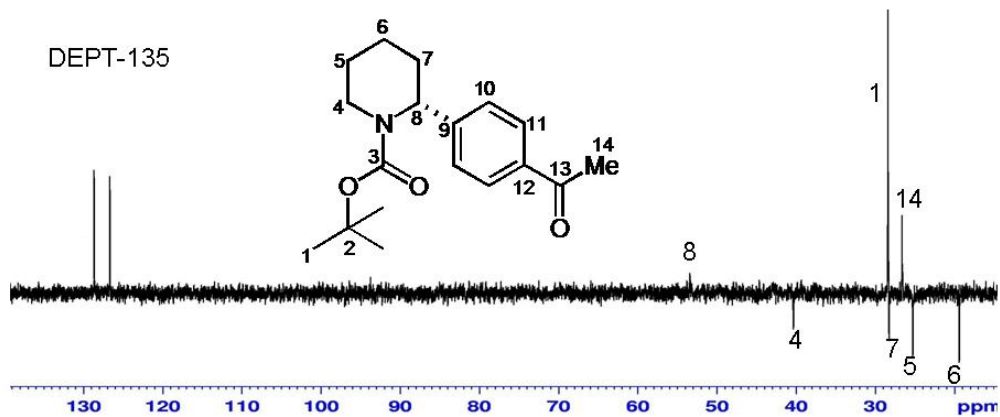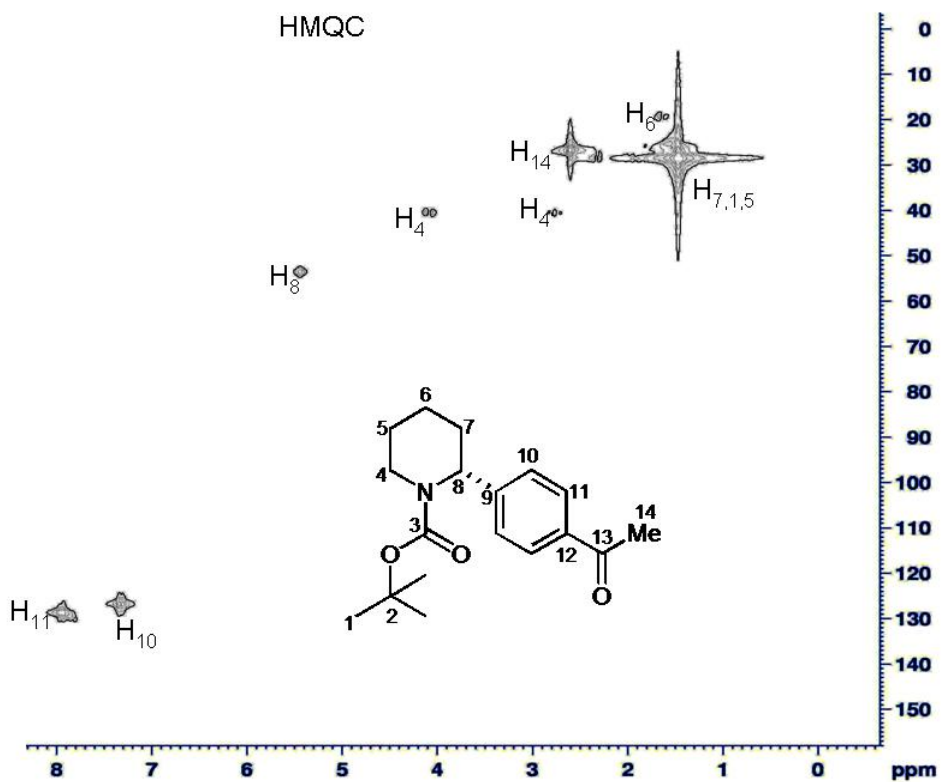

#### 4.7. Electrophilic quench with *p*-bromobenzonitrile: Synthesis of *R*-9

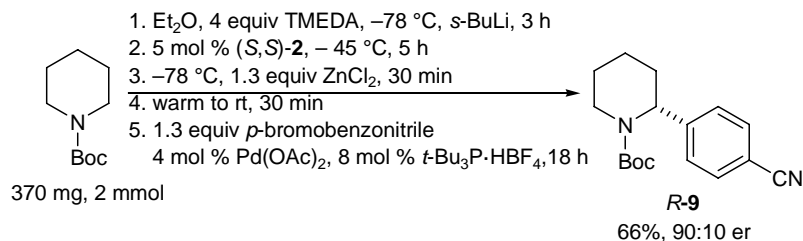

Using **General Procedure A**, *N*-Boc-piperidine (370 mg, 2.0 mmol), TMEDA (1.2 mL, 8.0 mmol, 4.0 equiv), Et<sub>2</sub>O (10 mL), *s*-BuLi (2.4 mL, 1.0 M, 2.4 mmol, 1.2 equiv), (*S,S*)-**2** (21.4 mg, 0.1 mmol, 5 mol %), in 0.40 mL Et<sub>2</sub>O pretreated with freshly titrated *s*-BuLi), ZnCl<sub>2</sub> (355 mg, 2.6 mmol, 1.3 equiv) in THF (2 mL), 4-bromobenzonitrile (471 mg, 2.6 mmol, 1.3 equiv), Pd(OAc)<sub>2</sub> (20 mg, 0.08 mmol, 4 mol %) and *t*-Bu<sub>3</sub>P·HBF<sub>4</sub> (46 mg, 0.16 mmol, 8 mol %) gave the crude product as an oil. Purification by silica gel column chromatography eluting with Hexane/EtOAc (90:10) afforded 378 mg of the pure product as an oil in 66% yield and 90:10 er; , [α]<sub>D</sub><sup>22</sup> +147.8 (*c* = 1, CHCl<sub>3</sub>) The er was determined by CSP-SFC as follows: **Column:** Pirkle-Whelk-O-1, **Flow Rate:** 2.0 mL/min, **Polarity Modifier %:** 2.0% EtOH, **Outlet Pressure = 150 psi**, **Oven Temperature = 35 °C**. The minor enantiomer elutes after ~7.0 min and the major enantiomer elutes after ~7.8 min. <sup>1</sup>H NMR (300 MHz, CDCl<sub>3</sub>) δ 7.60 (d, 2H), 7.30 (d, 2H), 5.25 (br, s, 1H), 3.87 (m, 1H), 2.55-2.48 (m, 1H), 2.10-2.05 (m, 1H), 1.92-1.57 (m, 5H) 1.48 (s, 9H), <sup>13</sup>C NMR (75.5 MHz, CDCl<sub>3</sub>) δ 155.4, 146.6, 132.4, 127.3, 118.9 110.3, 80.0, 53.4, 40.4, 28.4, 28.1, 25.1, 19.3.

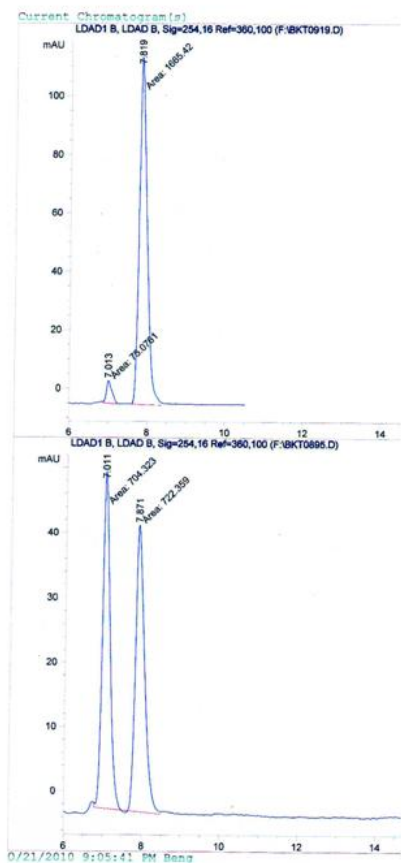

```

=====
Injection Date : 20101021,203914000,1,480
Sample Name    :
Acq. Operator  : Beng
Acq. Instrument: SFC 3D system
Acq. Method    : BENG.M
Analysis Method: C:\HPCHEM\2\METHODS\TKB.M
Last changed   : 10/21/2010 9:09:24 PM by Beng
                (modified after loading)
=====
  
```

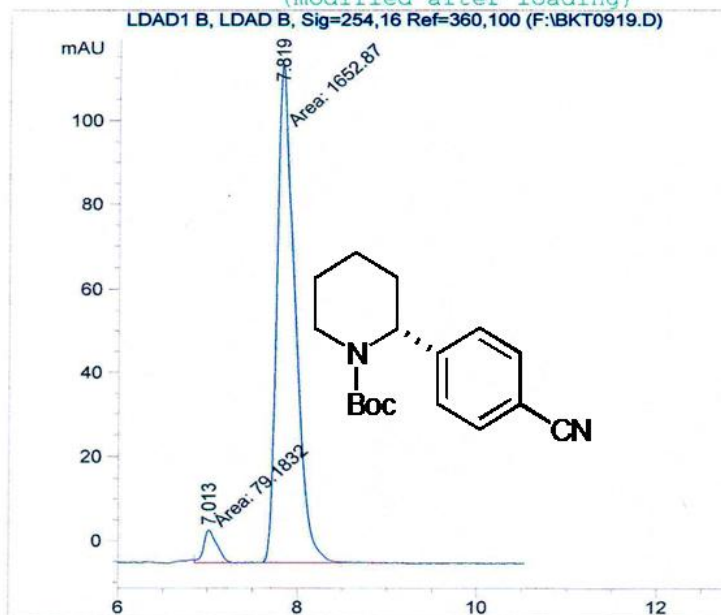

File :C:\Documents and Settings\Administrator\Desktop\Gawley metho  
... s sequence\BENG\ARYLATION-MESITYLENE.D\BOCFIP-BENZONITRILE F  
... 1.D  
Instrument : Instrument #1  
Operator : tkb  
Acquired : 20 Oct 2010 21:07 using AcqMethod drug test method.M  
Sample Name: F41

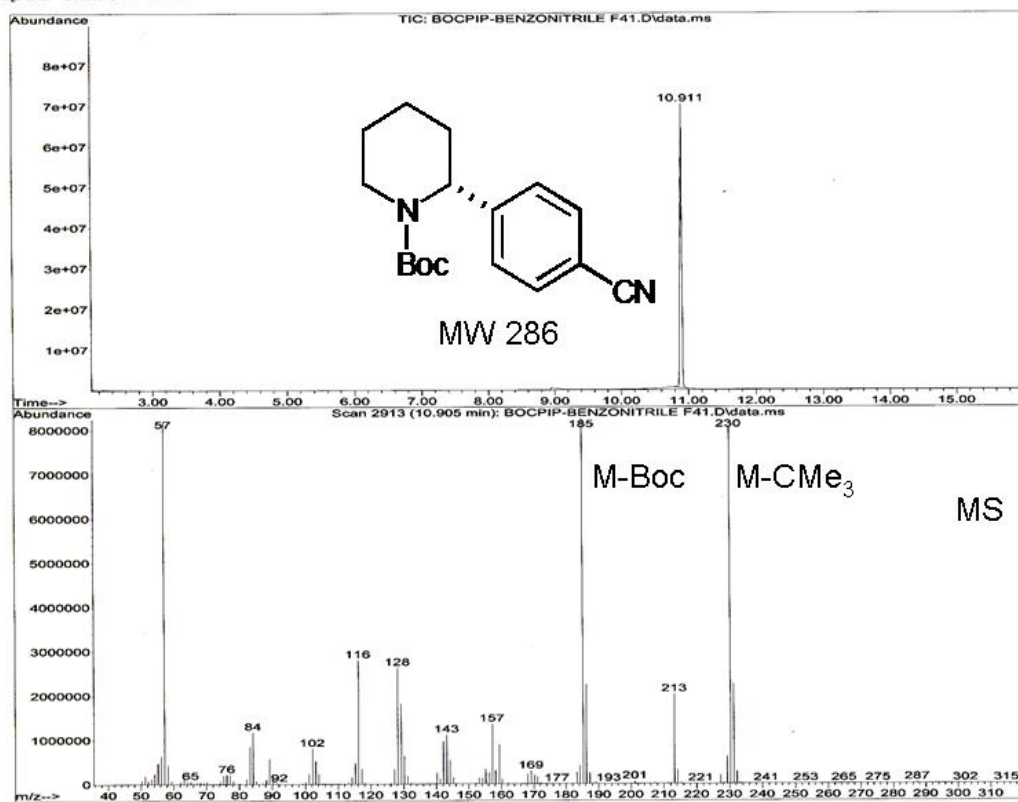

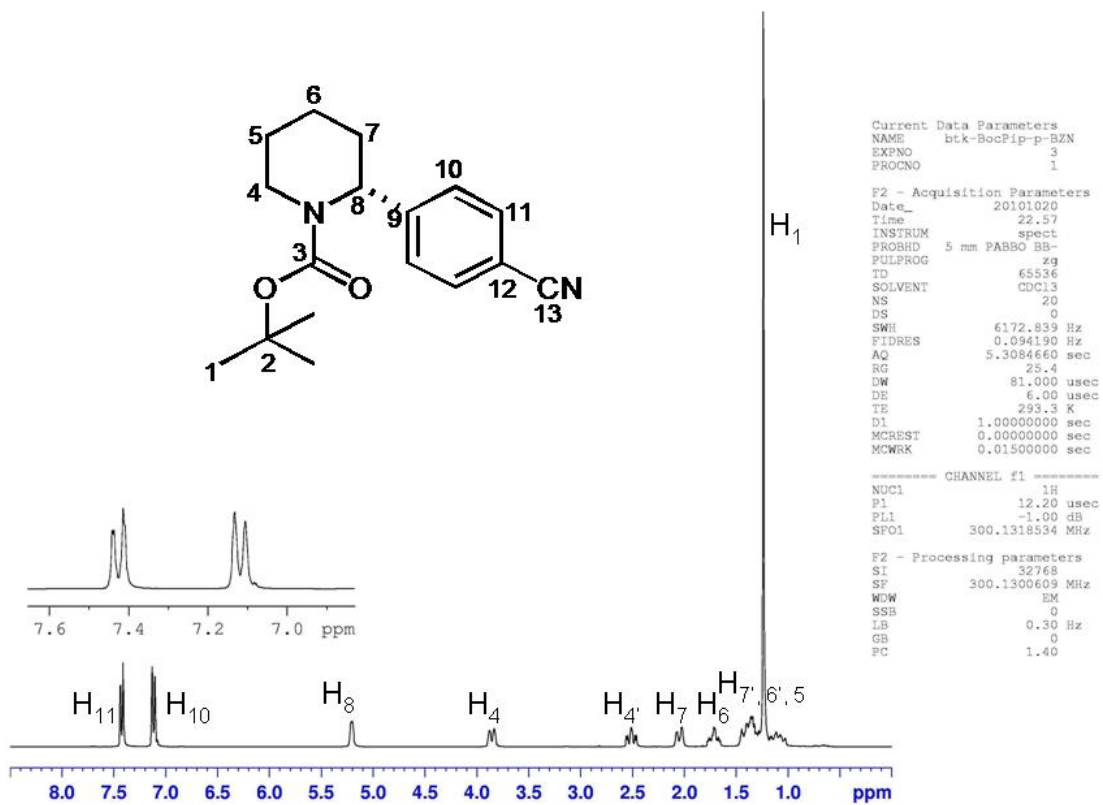

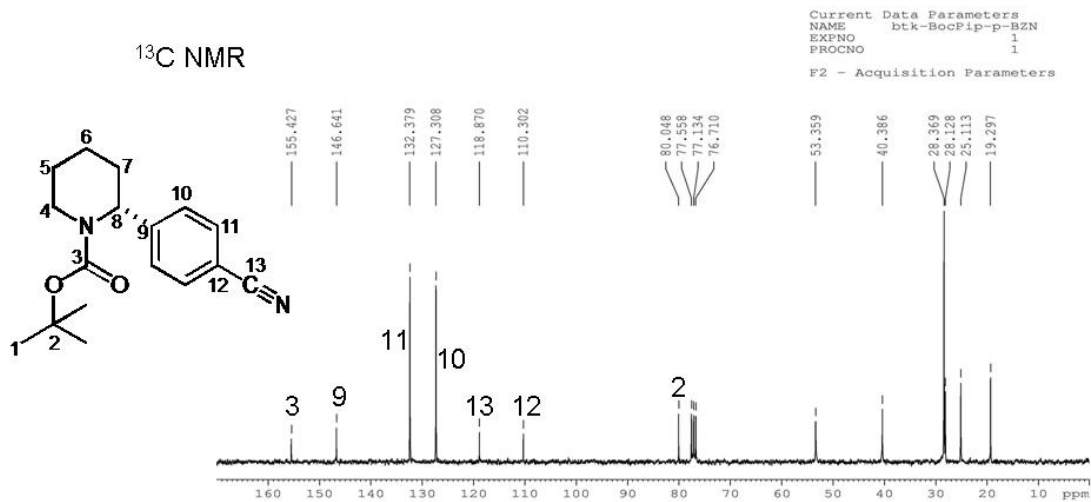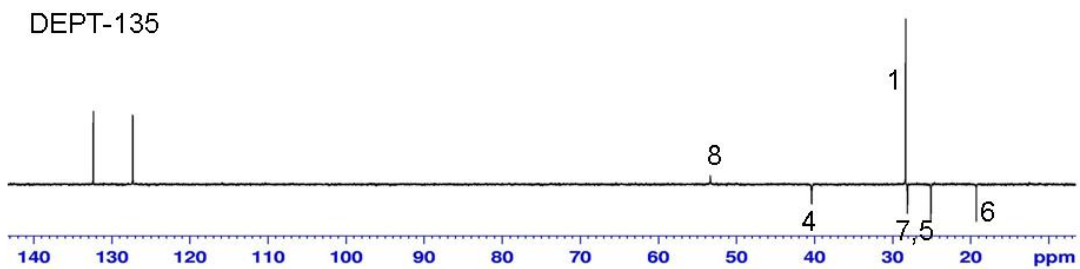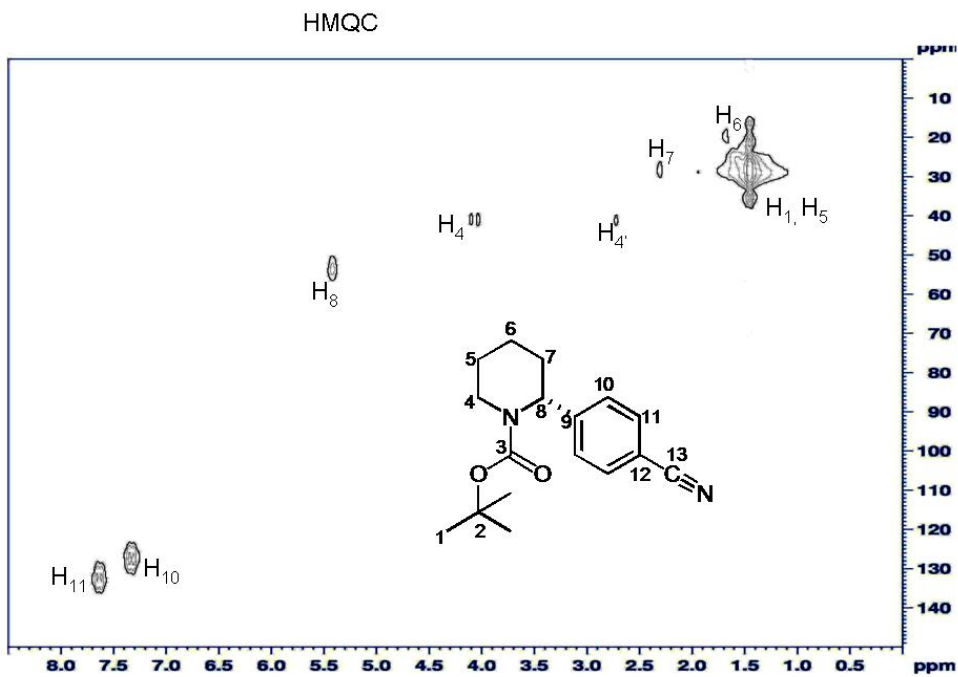



#### 4.8. Electrophilic quench with 4-bromo-2-trifluoromethyl aniline: Synthesis of R-10

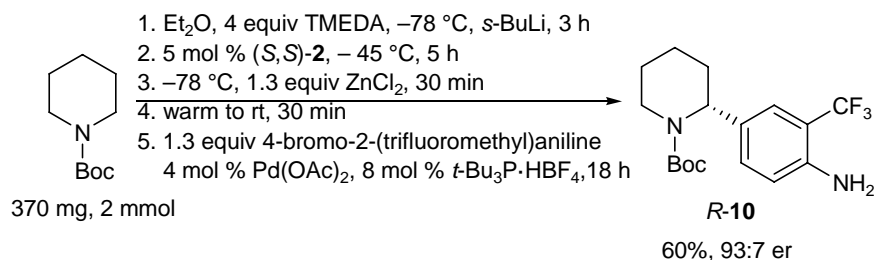

Using **General Procedure A**, *N*-Boc-piperidine (370 mg, 2.0 mmol), TMEDA (1.2 mL, 8.0 mmol, 4.0 equiv), Et<sub>2</sub>O (10 mL), *s*-BuLi (2.4 mL, 1.0 M, 2.4 mmol, 1.2 equiv), (*S,S*)-**2** (21.4 mg, 0.1 mmol, 5 mol %), in 0.40 mL Et<sub>2</sub>O pretreated with freshly titrated *s*-BuLi, ZnCl<sub>2</sub> (355 mg, 2.6 mmol, 1.3 equiv) in THF (2 mL), 4-bromo-2-trifluoromethylaniline (621 mg, 2.6 mmol, 1.3 equiv), Pd(OAc)<sub>2</sub> (20 mg, 0.08 mmol, 4 mol %) and *t*-Bu<sub>3</sub>P·HBF<sub>4</sub> (46 mg, 0.16 mmol, 8 mol %) gave the crude product as an oil. Purification by silica gel column chromatography eluting with Hexane/EtOAc (90:10) afforded 413 mg of the pure product as an oil in 60% yield and 93:7 er; , [α]<sub>D</sub><sup>22</sup> +101.6 (*c* = 1, CHCl<sub>3</sub>) The er was determined by CSP-SFC as follows: **Column:** Pirkle-Whelk-O-1, **Flow Rate:** 2.5 mL/min, **Polarity Modifier %:** 2.5% EtOH, Outlet Pressure = **150 psi**, **Oven Temperature** = 35 °C. The major enantiomer elutes after ~5.4 min and the minor enantiomer elutes after ~6.4 min. <sup>1</sup>H NMR (300 MHz, CDCl<sub>3</sub>) δ 7.25 (s, 1H), 7.15 (d, 1H), 6.75 (d, 1H), 5.35 (br, s, 1H), 4.15-3.99 (m, 3H), 2.68 (m, 1H), 2.28-2.22 (m, 1H), 1.91-1.78 (m, 1H), 1.66-1.48 (m, 13H); <sup>13</sup>C NMR (75.5 MHz, CDCl<sub>3</sub>) δ 155.6, 143.0, 131.2, 129.4, 124.5, 117.6, 114.2, 79.7, 52.3, 39.9, 28.4, 27.7, 25.4, 19.3.

CSP-SFC

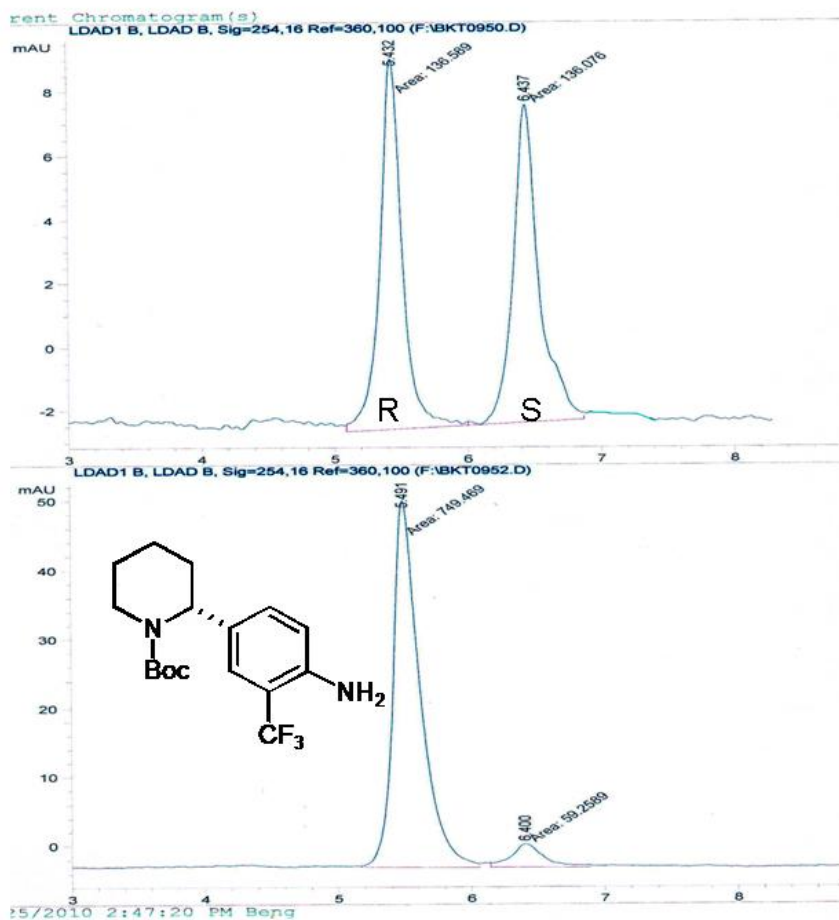

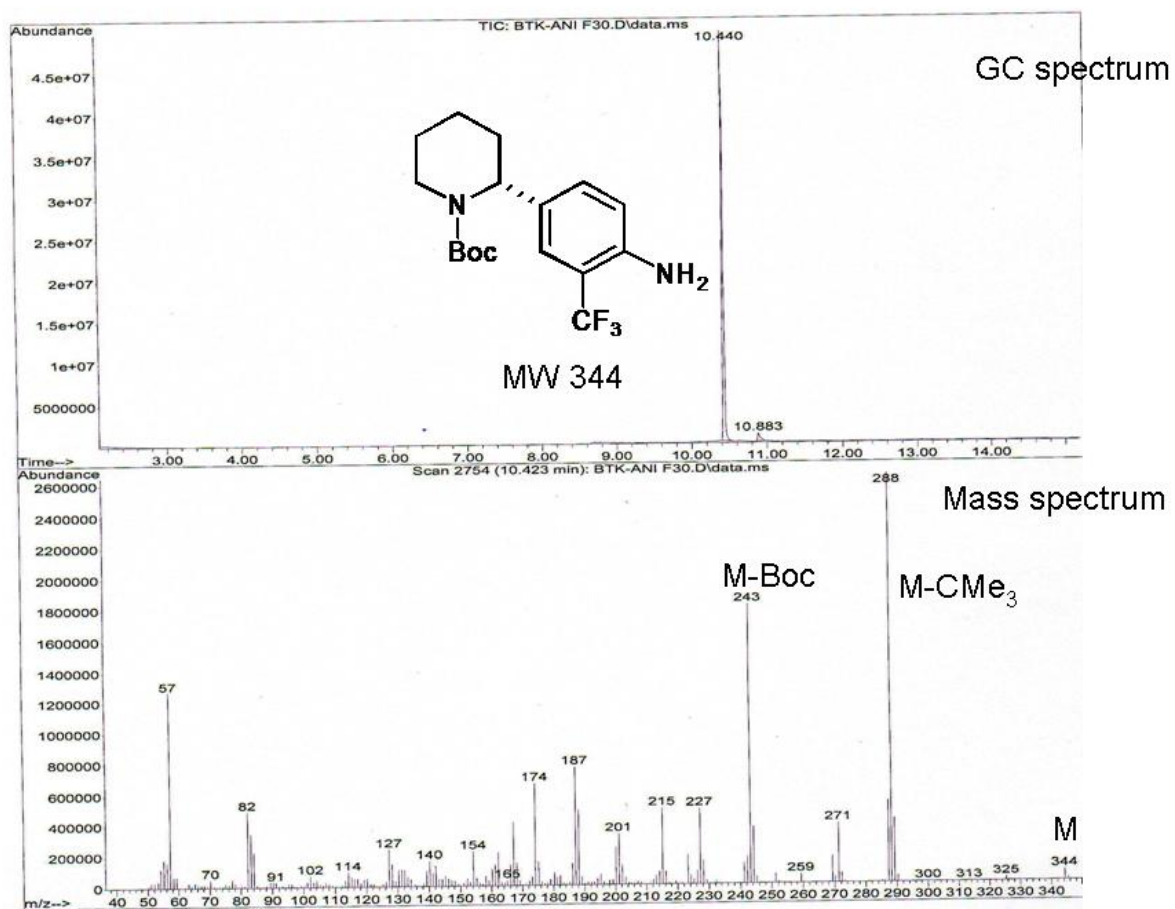

**Note:** The minor peak at 10.88 min corresponds to an unidentified structural isomer.

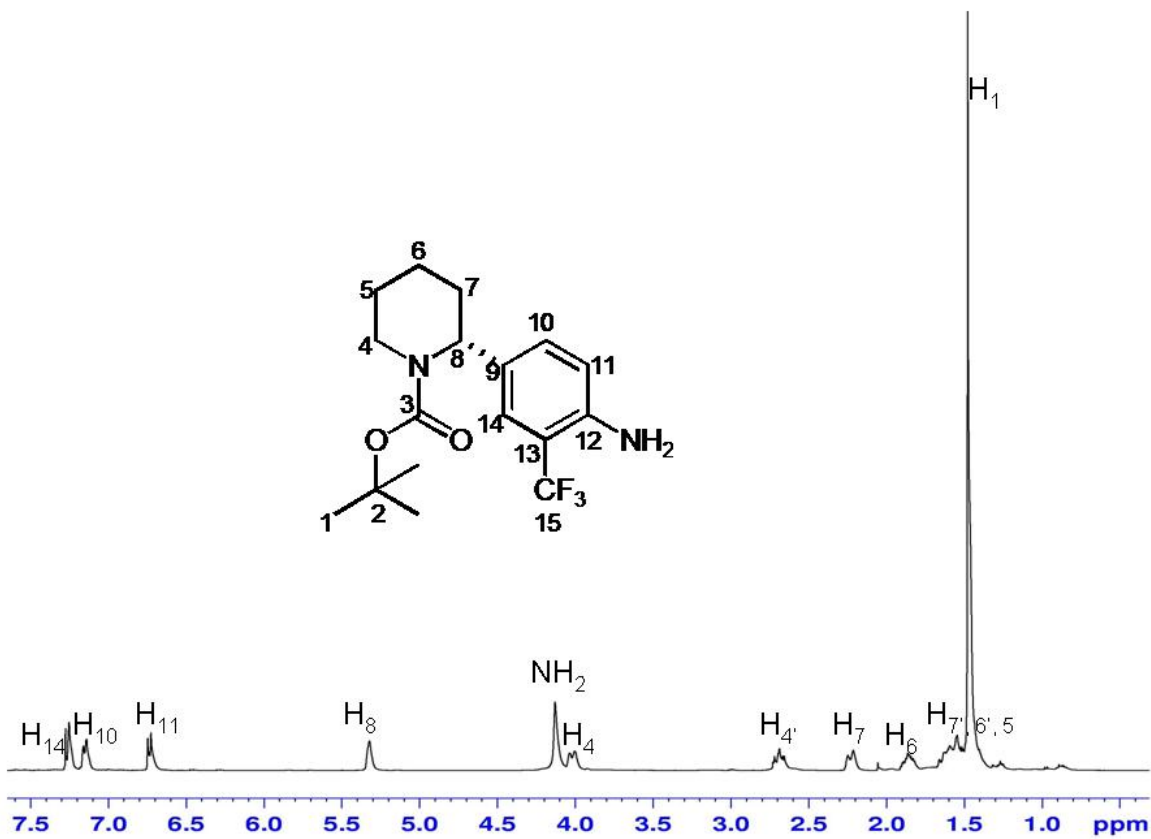

See full assignments on HMQC

$^{13}\text{C}$  NMR (Partial)

Note:  $\text{C}_{15}$  is a quartet due to coupling to fluorine

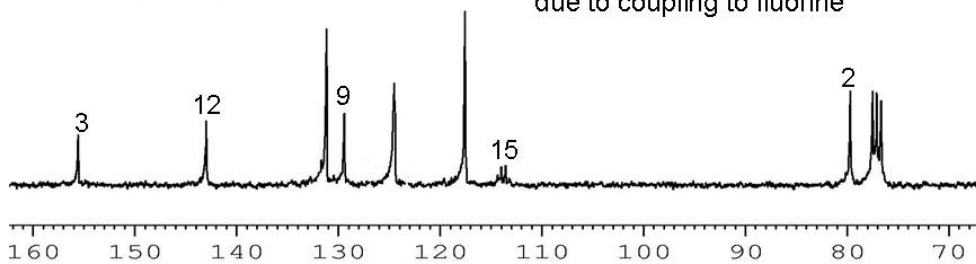

Note:  $\text{C}_{13}$  is not visible (maybe masked by  $\text{C}_{11}$ )

DEPT-135

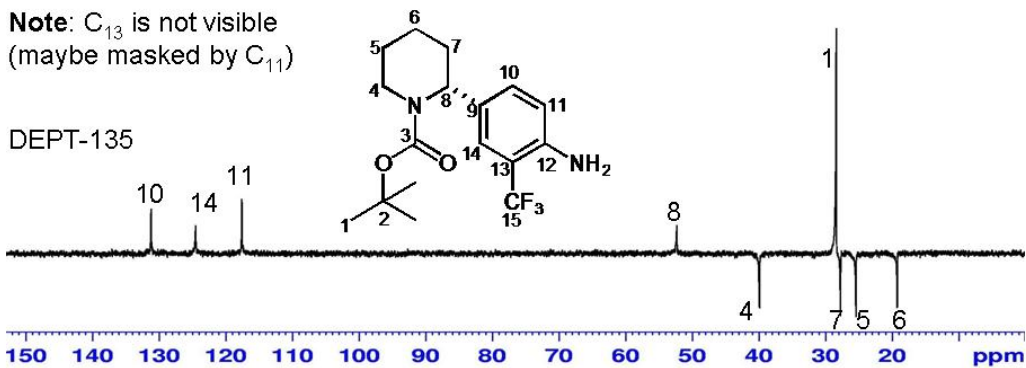

HMQC

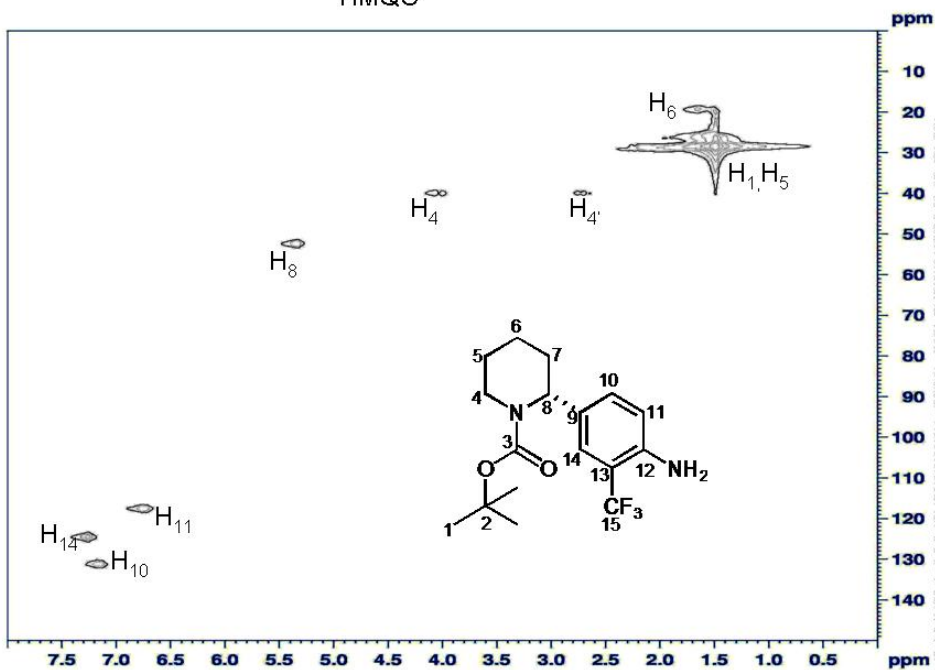

#### 4.9. Electrophilic quench with 1-Bromonaphthalene: Synthesis of R-11

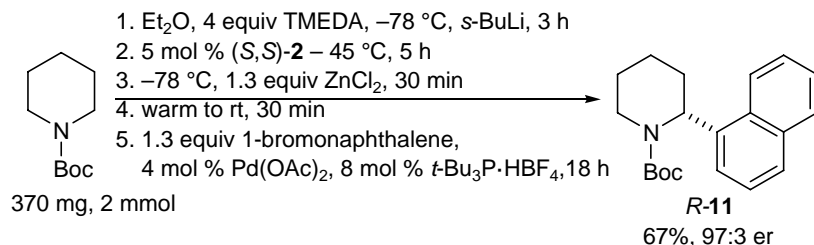

Using **General Procedure A**, *N*-Boc-piperidine (370 mg, 2.0 mmol), TMEDA (1.2 mL, 8.0 mmol, 4.0 equiv), Et<sub>2</sub>O (10 mL), *s*-BuLi (2.4 mL, 1.0 M, 2.4 mmol, 1.2 equiv), (*S,S*)-**2** (21.4 mg, 0.1 mmol, 5 mol %), in 0.40 mL Et<sub>2</sub>O pretreated with freshly titrated *s*-BuLi), ZnCl<sub>2</sub> (355 mg, 1.3 mmol, 1.3 equiv) in THF (2 mL), 1-bromonaphthalene (532 mg, 0.36 mL, 2.6 mmol, 1.3 equiv), Pd(OAc)<sub>2</sub> (20 mg, 0.08 mmol, 4 mol %) and *t*-Bu<sub>3</sub>P·HBF<sub>4</sub> (46 mg, 0.16 mmol, 8 mol %) gave the crude product as an oil. Purification by silica gel column chromatography eluting with Hexane/EtOAc (60:40) afforded 417 mg of the pure product as an amorphous solid in 67% yield and 97:3 er; spectroscopic data as reported.<sup>3</sup> The er was determined by CSP-SFC as follows: **Column:** Pirkle-Whelk-O-1, **Flow Rate:** 3.0 mL/min, **Polarity Modifier %:** 10.0% EtOH, **Outlet Pressure = 150 psi**, **Oven Temperature = 35 °C**. The minor enantiomer elutes after ~1.8 min and the major enantiomer elutes after ~2.5 min. <sup>1</sup>H NMR (300 MHz, CDCl<sub>3</sub>) δ = 8.34–7.37 (m, 6H), 6.05–5.89 (t, 1H), 4.22–4.07 (m, 1H), 3.33–3.19 (m, 1H), 2.24–2.09 (m, 2H), 1.84–1.75 (m, 1H), 1.71–1.54 (m, 4H), 1.46 (s, 9H); <sup>13</sup>C NMR (75.5 MHz, CDCl<sub>3</sub>) δ = 155.6, 139.1, 134.0, 128.9, 127.3, 125.8, 125.4, 124.9, 123.5, 123.2, 79.5, 52.1, 41.7, 29.5, 28.3, 24.7, 19.4

# CSP-SFC

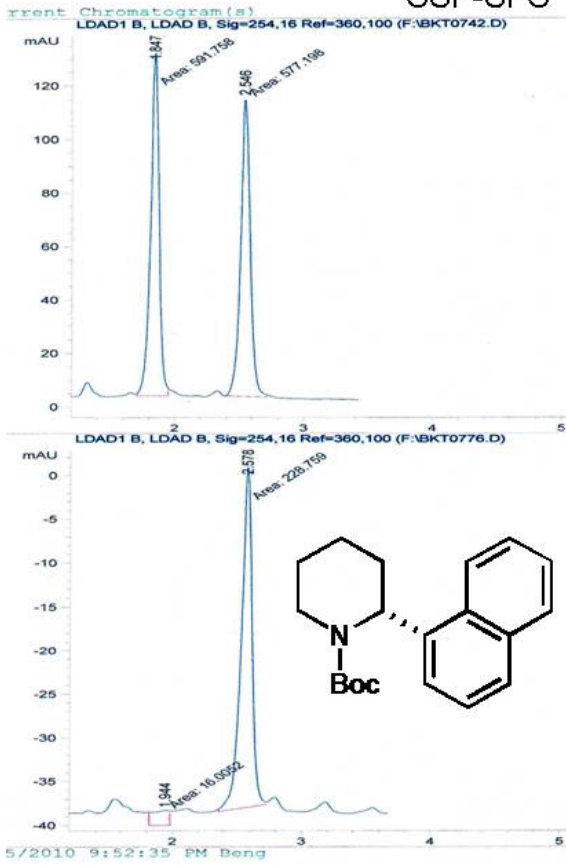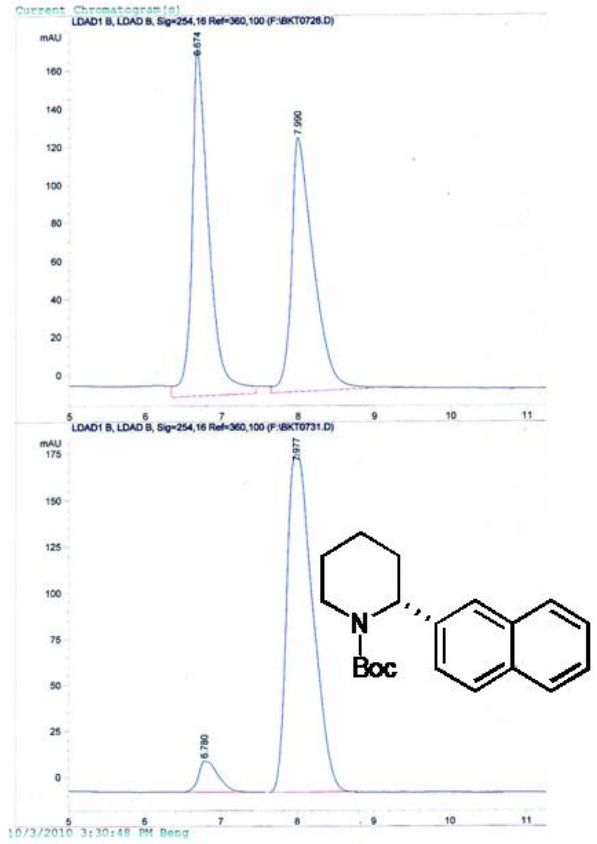

```

File       : C:\Documents and Settings\Administrator\Desktop\Gawley metho
           : s sequence\BENG\ARYLATION-MESITYLENE.D\BOCPIP-NP F69.D
Operator   : tkb
Instrument  : Instrument #1
Acquired   : 2 Oct 2010 22:17      using AcqMethod DRUG TEST METHOD.M
Sample Name: f69
Misc Info  :

```

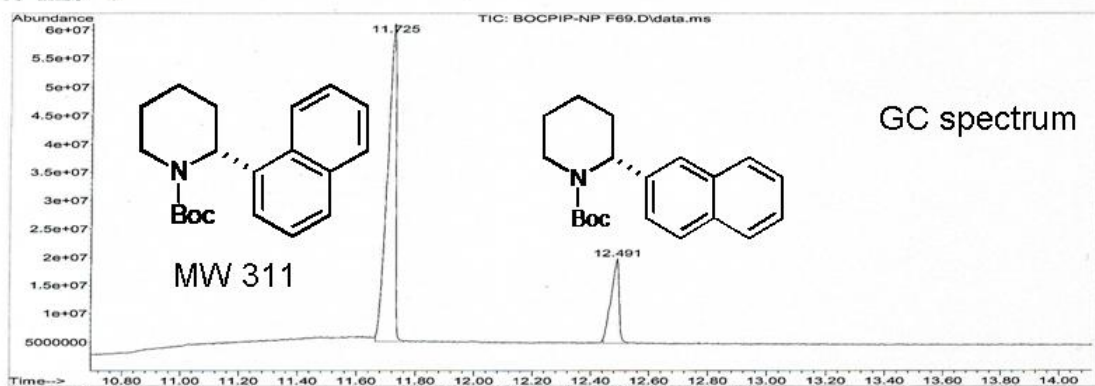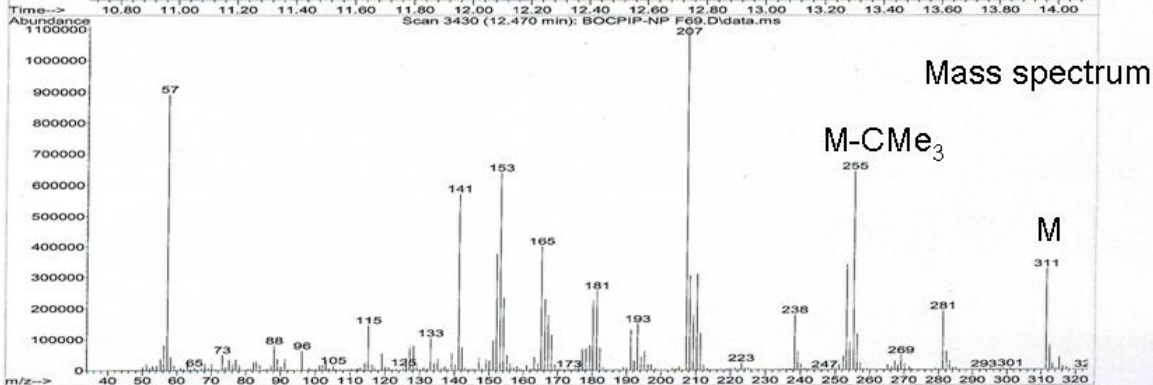

**Note:** During the synthesis of *R*-11, the aryl bromide contained small amounts of 2-bromonaphthalene, as such *R*-11 was prepared in 95:5 er (see SFC trace above). The er was determined by CSP-SFC as follows: **Column:** Regis Technologies Pirkle-Whelk-O-1, **Flow Rate:** 2.0 mL/min, **Polarity Modifier %:** 3.0% EtOH, **Outlet Pressure = 150 psi**, **Oven Temperature = 35 °C**. The minor enantiomer elutes after ~6.7 min and the major enantiomer elutes after ~8.0 min. The above GC-MS is from one of the fractions during column chromatography. It doesn't reflect the exact ratio of the two regioisomers.



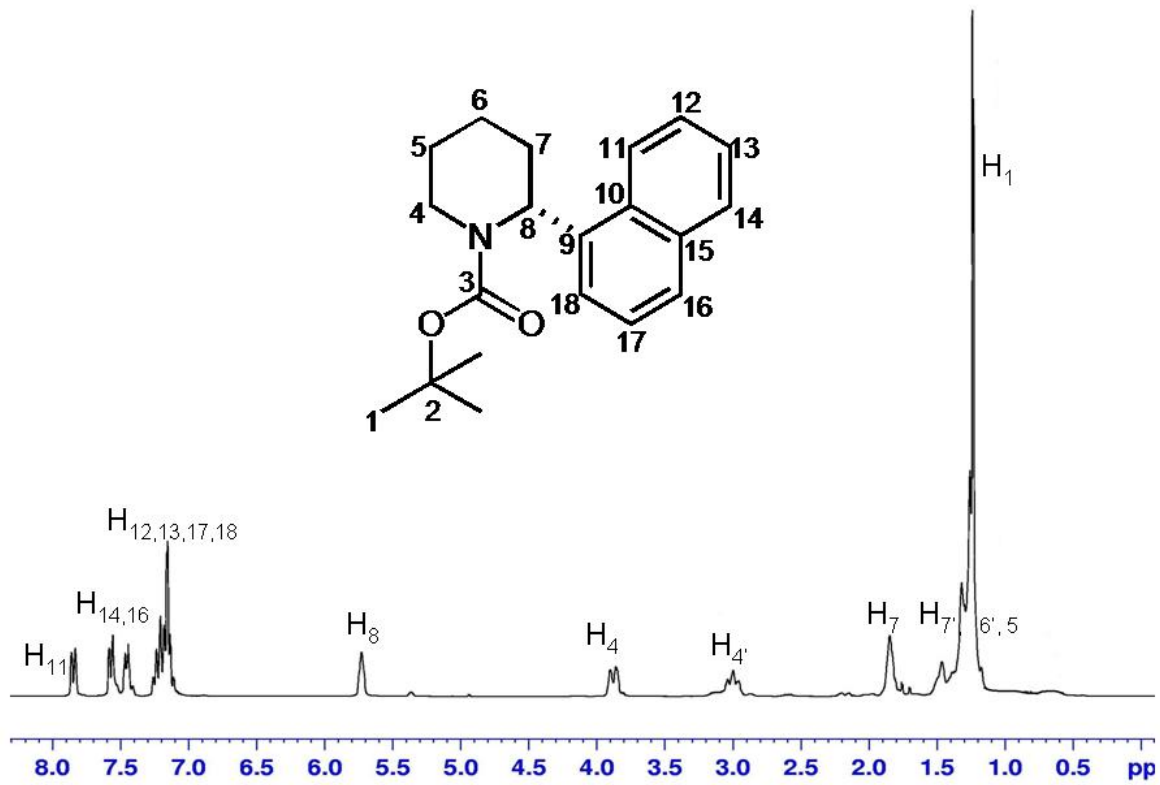

<sup>13</sup>C NMR (PARTIAL)

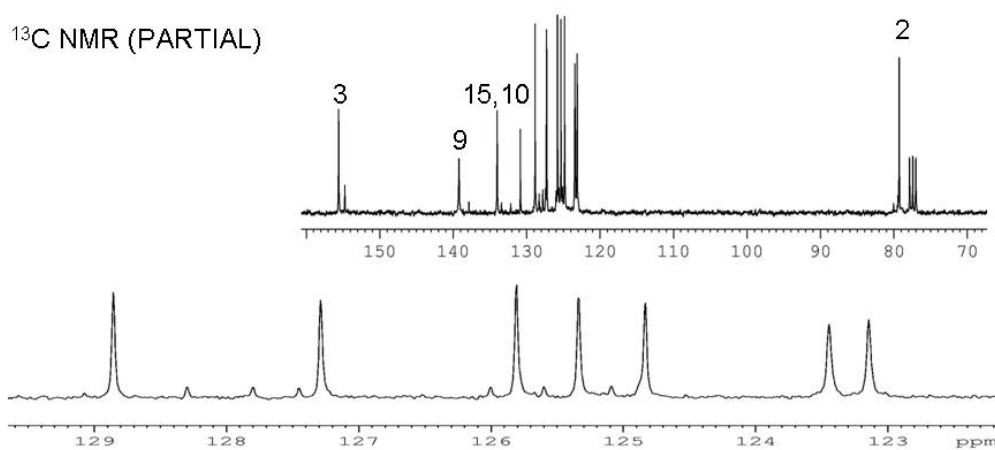

DEPT-135 (PARTIAL)

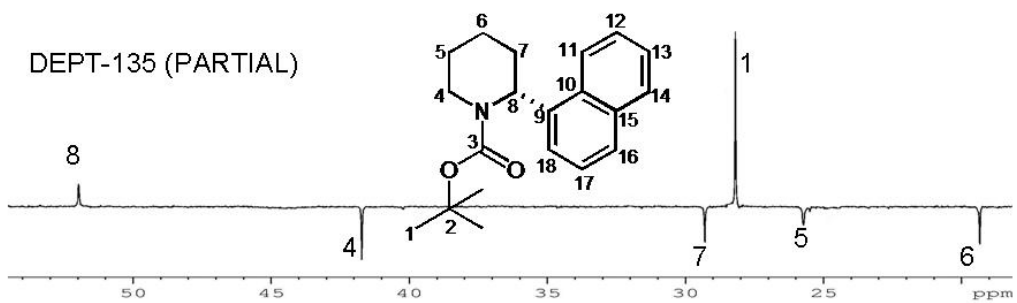

HMQC

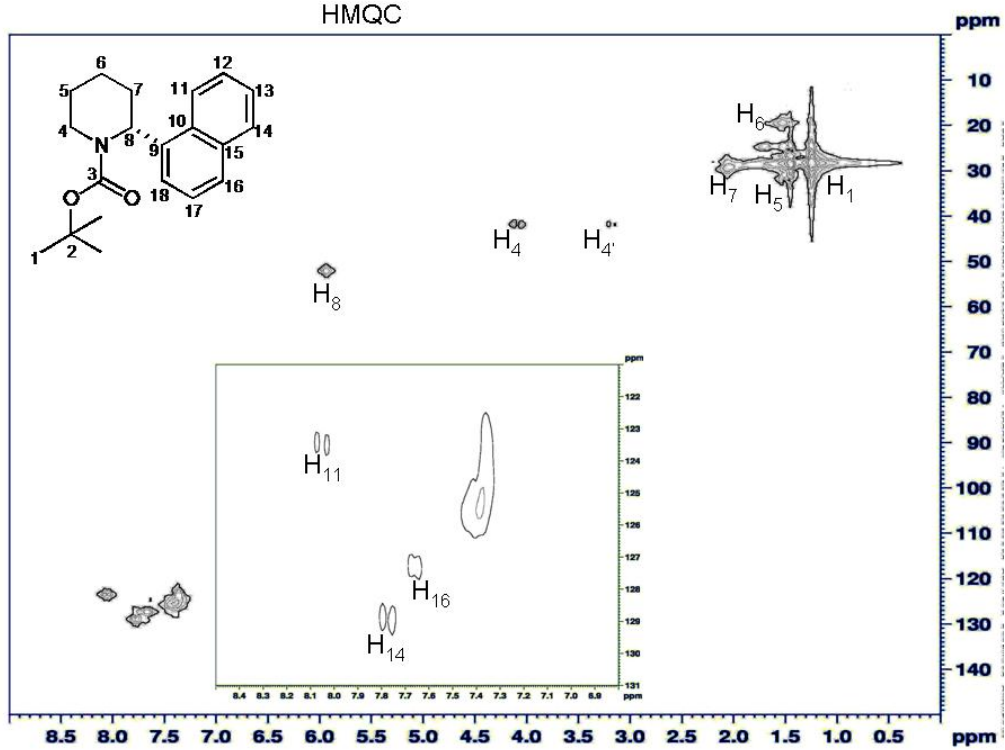

#### 4.10. Electrophilic quench with 3-Bromopyridine: synthesis of *R*-12

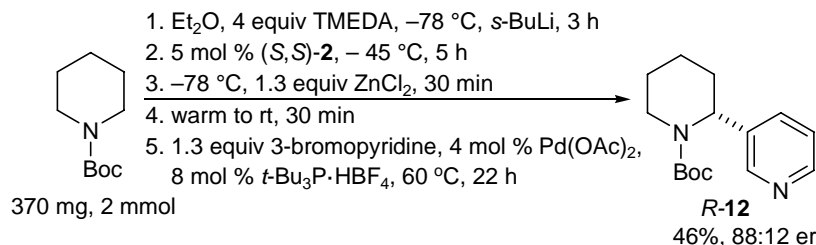

Using **General Procedure B**, *N*-Boc-piperidine (370 mg, 2.0 mmol), TMEDA (1.2 mL, 8.0 mmol, 4.0 equiv), Et<sub>2</sub>O (10 mL), *s*-BuLi (2.4 mL, 1.0 M, 2.4 mmol, 1.2 equiv), (*S,S*)-**2** (21.4 mg, 0.1 mmol, 5 mol %), in 0.40 mL Et<sub>2</sub>O pretreated with freshly titrated *s*-BuLi, ZnCl<sub>2</sub> (355 mg, 2.6 mmol, 1.3 equiv) in THF (2 mL), 3-bromopyridine (0.25 mL, 2.6 mmol, 1.3 equiv), Pd(OAc)<sub>2</sub> (20 mg, 0.08 mmol, 4 mol %) and *t*-Bu<sub>3</sub>P·HBF<sub>4</sub> (46 mg, 0.16 mmol, 8 mol %) gave the crude product as an oil. Purification by silica gel column chromatography eluting with Hexane/EtOAc (70:30) afforded 241 mg of the pure product as an oil in 46% yield and 88:12 er, [ $\alpha$ ]<sub>D</sub><sup>22</sup> +88.6 (*c* = 1, CHCl<sub>3</sub>) spectroscopic data as reported. <sup>1</sup>H NMR (300 MHz, CDCl<sub>3</sub>)  $\delta$  = 8.51 (br, s, 2H), 7.54 (t, 1H), 7.32–7.21 (m, 1H), 5.47 (br, s, 1H), 4.1 (d, 1H), 2.87–2.68 (m, 1H), 2.29 (d, 1H), 1.99–1.87 (m, 1H), 1.71–1.33 (m, 13H); <sup>13</sup>C NMR (75.5 MHz, CDCl<sub>3</sub>)  $\delta$  = 155.7, 148.3, 147.0, 136.4, 134.9, 123.9, 80.1, 47.1, 40.6, 28.8, 28.2, 25.7, 19.7

## CSP-SFC

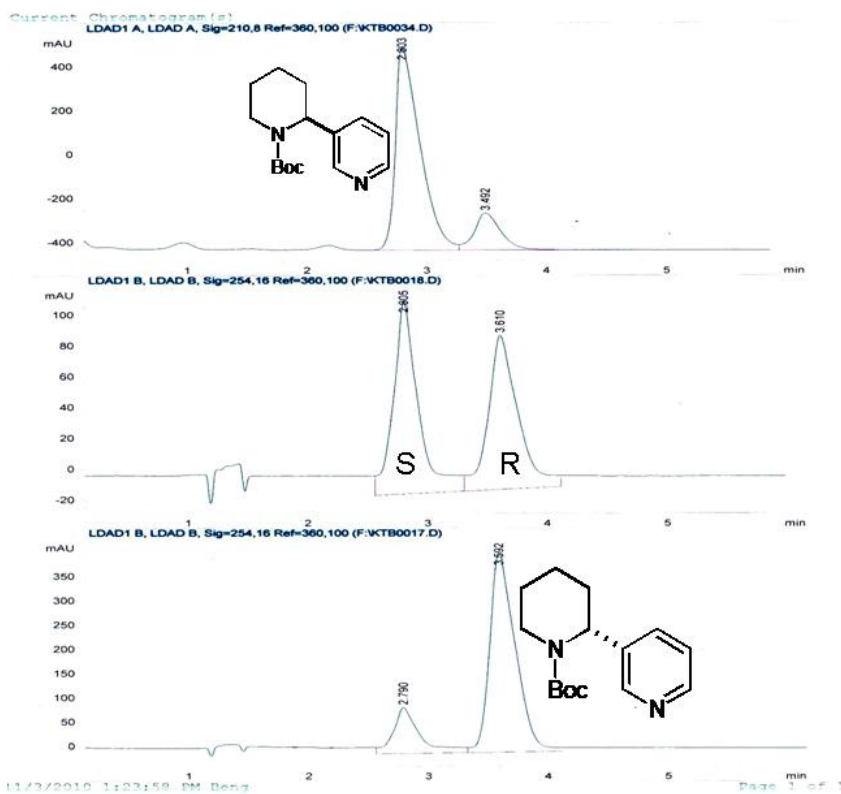

### 4.11. Electrophilic quench with 2-Bromopyridine: Synthesis of *R*-13

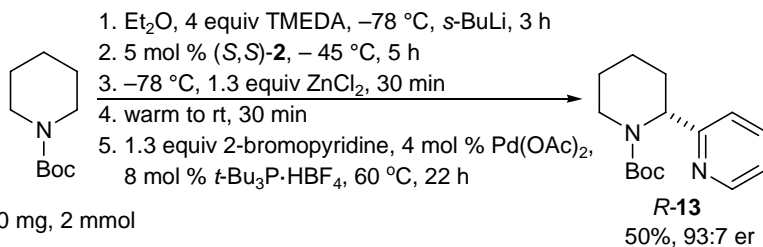

Using **General Procedure B**, *N*-Boc-piperidine (370 mg, 2.0 mmol), TMEDA (1.2 mL, 8.0 mmol, 4.0 equiv), Et<sub>2</sub>O (10 mL), *s*-BuLi (2.4 mL, 1.0 M, 2.4 mmol, 1.2 equiv), (*S,S*)-**2** (21.4 mg, 0.1 mmol, 5 mol %), in 0.40 mL Et<sub>2</sub>O pretreated with freshly titrated *s*-BuLi, ZnCl<sub>2</sub> (355 mg, 2.6 mmol, 1.3 equiv) in THF (2 mL), 2-bromopyridine (0.25 mL, 2.6 mmol, 1.3 equiv), Pd(OAc)<sub>2</sub> (20 mg, 0.08 mmol, 4 mol %) and *t*-Bu<sub>3</sub>P·HBF<sub>4</sub> (46 mg, 0.16 mmol, 8 mol %) gave the crude product as an oil. Purification by silica gel column chromatography eluting with Hexane/EtOAc (70:30) afforded 262 mg of the pure product as an oil in 50% yield and 93:7 er; [α]<sub>D</sub><sup>22</sup> +93.1 (*c* =

1, CHCl<sub>3</sub>) The er was determined by CSP-SFC as follows: **Column:** Daicel Chiralcel OD-H, **Flow Rate** = 2.0 mL/min, **Polarity Modifier** = 2.0% EtOH. The minor enantiomer elutes after ~6 min and the major enantiomer elutes after 7 min.

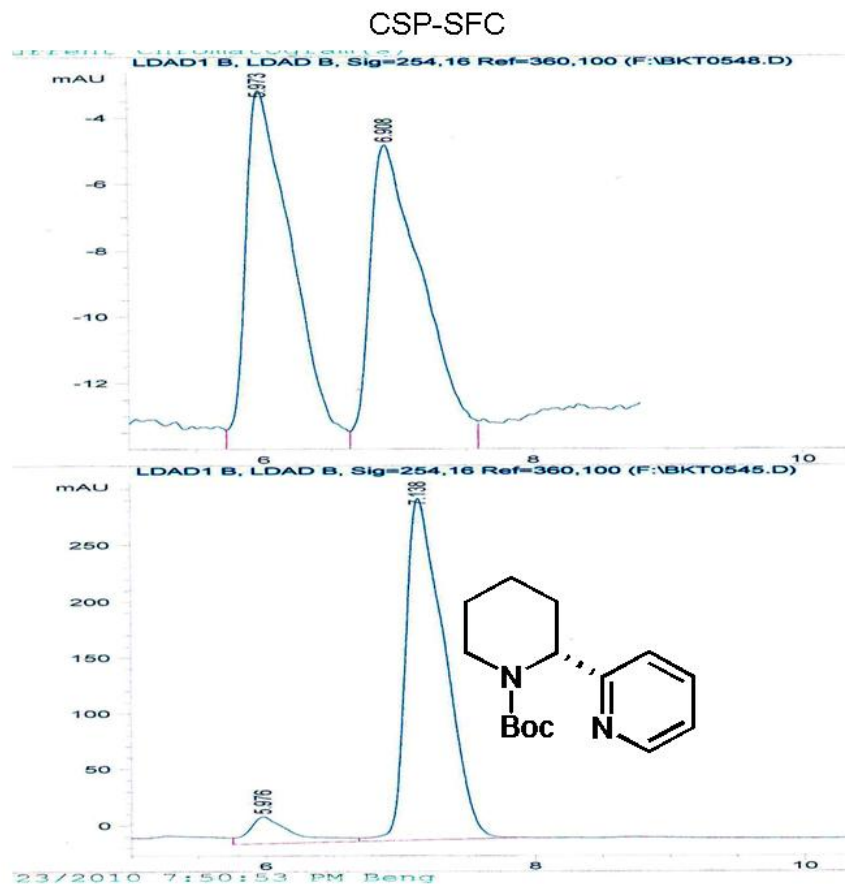

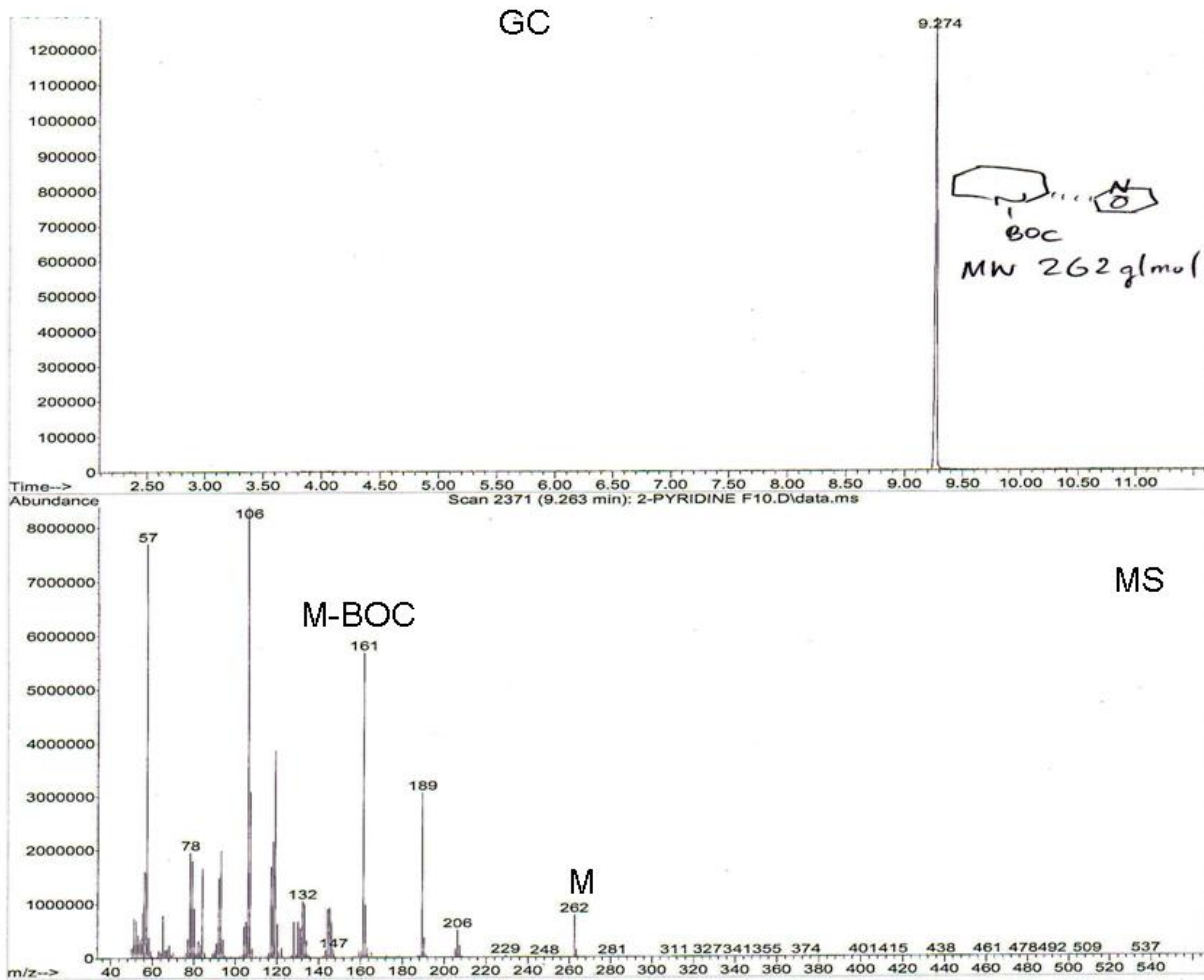

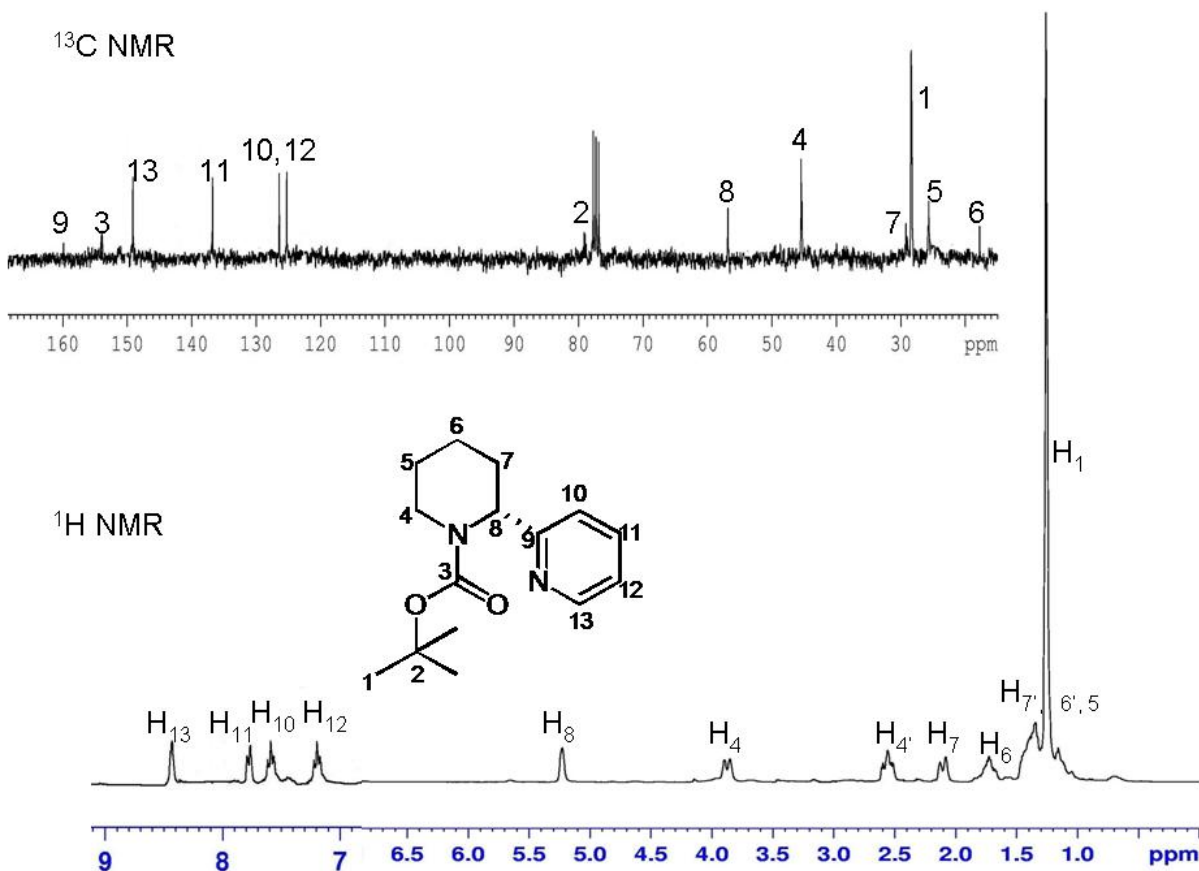

#### 4.12. Electrophilic quench with 2-Bromopyrimidine: Synthesis of *R*-14

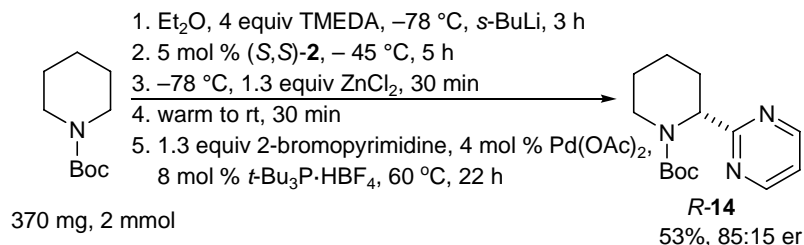

Using **General Procedure B**, *N*-Boc-piperidine (370 mg, 2.0 mmol), TMEDA (1.2 mL, 8.0 mmol, 4.0 equiv), Et<sub>2</sub>O (10 mL), *s*-BuLi (2.4 mL, 1.0 M, 2.4 mmol, 1.2 equiv), (*S,S*)-**2** (21.4 mg, 0.1 mmol, 5 mol %), in 0.40 mL Et<sub>2</sub>O pretreated with freshly titrated *s*-BuLi, ZnCl<sub>2</sub> (355 mg, 2.6 mmol, 1.3 equiv) in THF (2 mL), 2-bromopyrimidine (413 mg, 2.6 mmol, 1.3 equiv), Pd(OAc)<sub>2</sub> (20 mg, 0.08 mmol, 4 mol %) and *t*-Bu<sub>3</sub>P·HBF<sub>4</sub> (46 mg, 0.16 mmol, 8 mol %) gave the crude product as an oil. Purification by silica gel column chromatography eluting with Hexane/EtOAc (60:40) afforded 278 mg of the pure product as an oil in 53% yield and 85:15 er; [α]<sub>D</sub><sup>22</sup> +75.6 (*c*

= 1, CHCl<sub>3</sub>) The er was determined by CSP-SFC as follows: **Column:** Pirkle-Whelk-O-1, **Flow Rate:** 1.0 mL/min, **Polarity Modifier %:** 1.0% EtOH, **Outlet Pressure = 150 psi**, **Oven Temperature = 35 °C**. The major enantiomer elutes after ~21.8 min and the minor enantiomer elutes after ~25.3 min.

### CSP-SFC

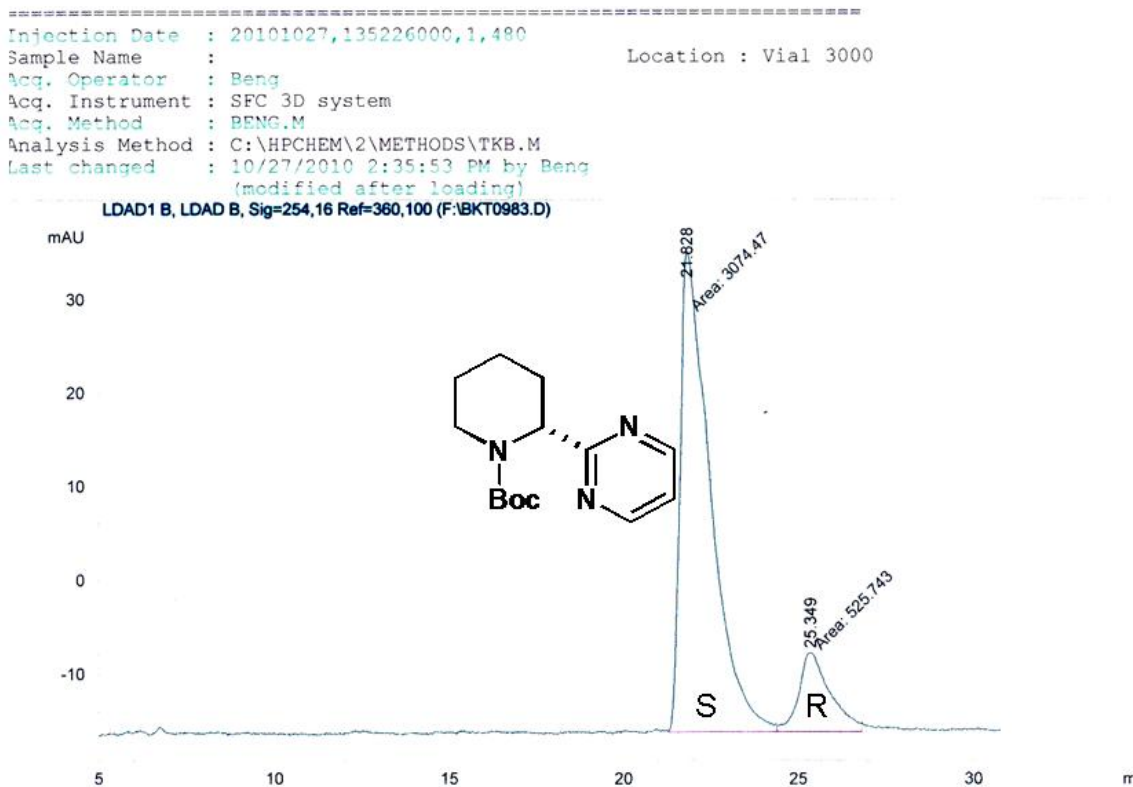



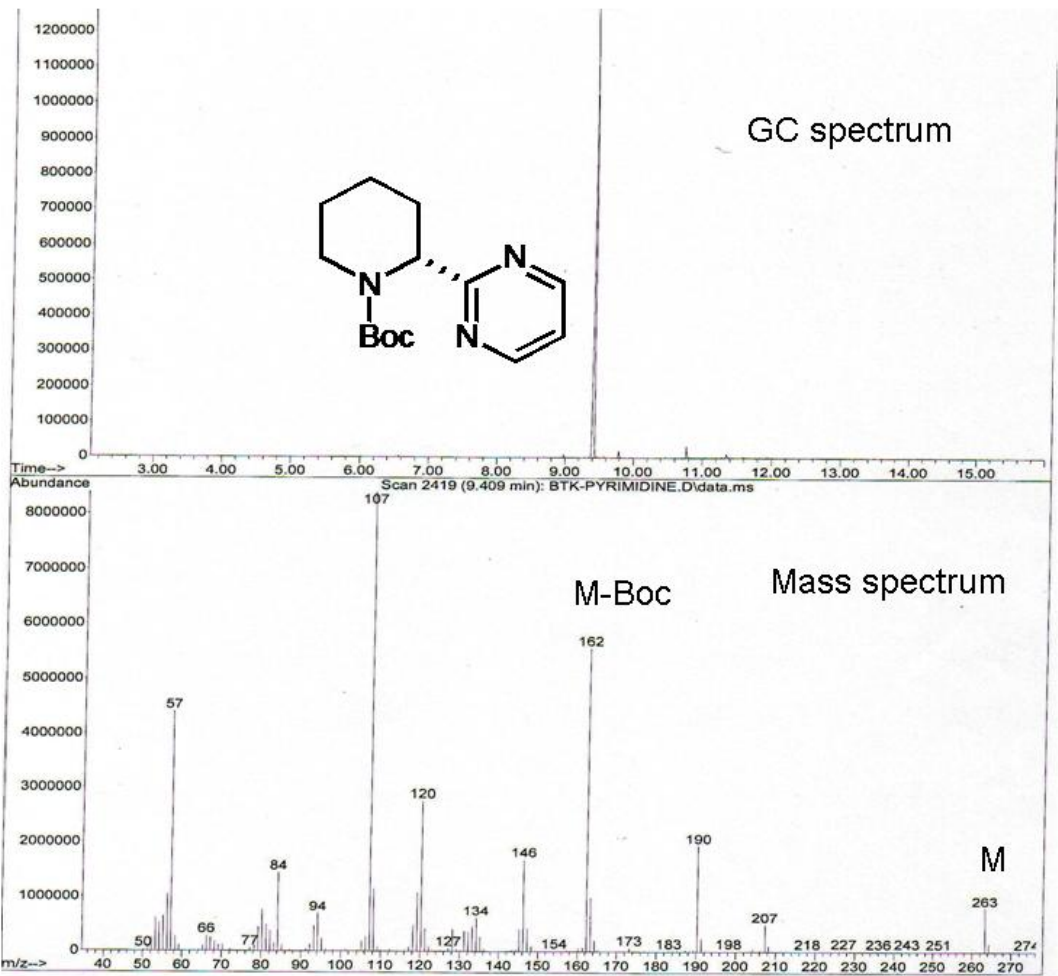

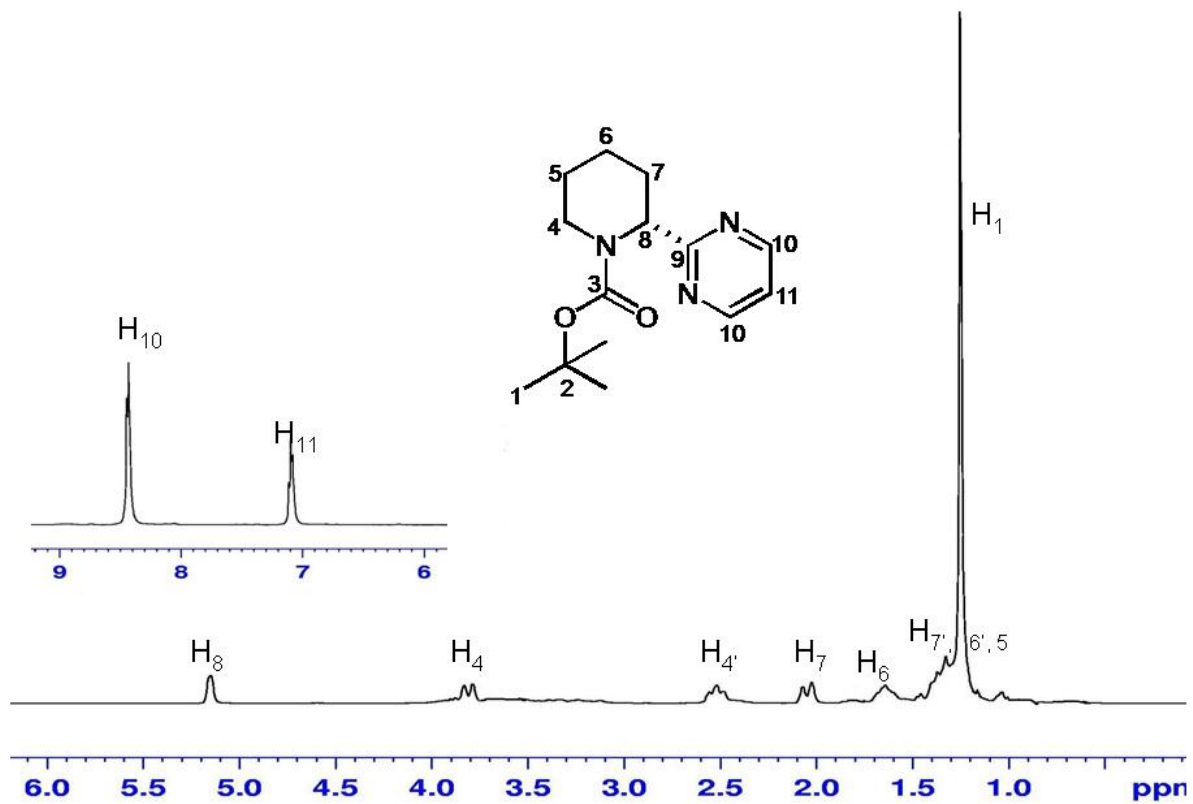

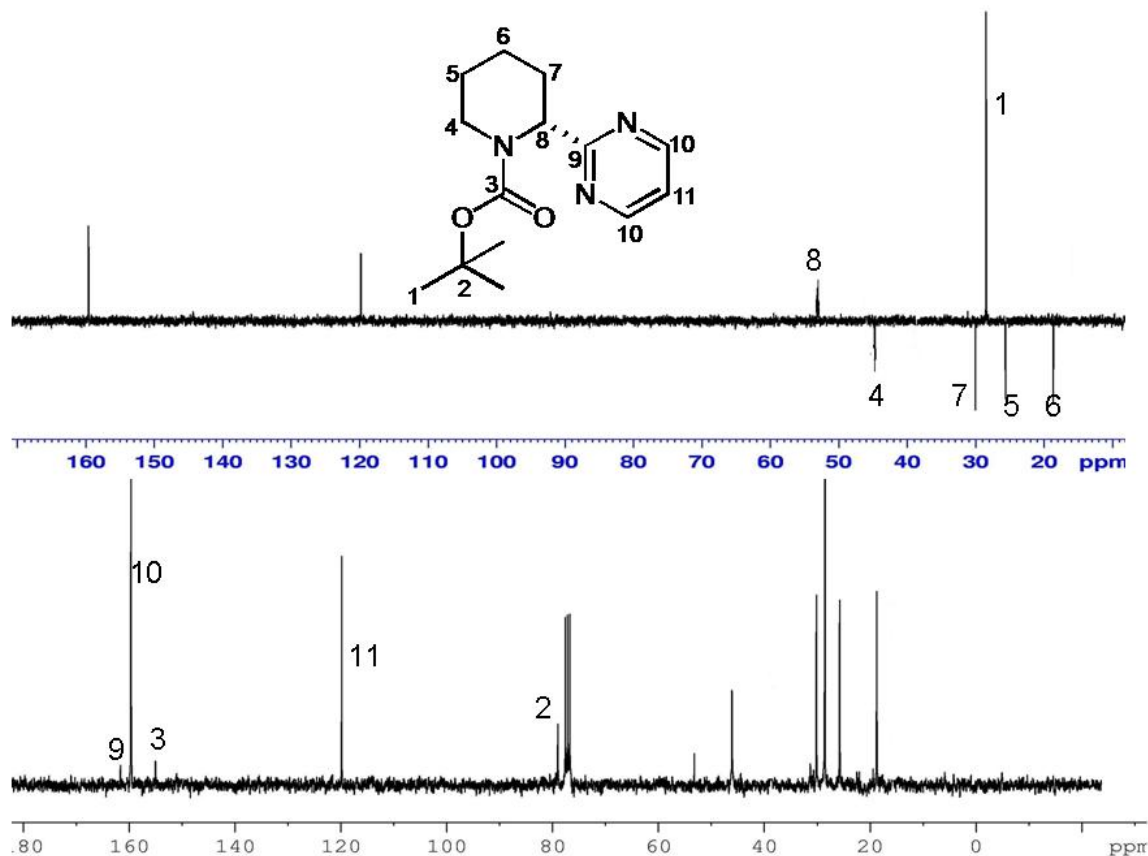

## 5. Synthesis of (*S*)-anabasine

To *N*-Boc-(*S*)-(-)-anabasine of 90:10 er (150 mg, 0.58 mol) dissolved in CH<sub>2</sub>Cl<sub>2</sub> (3.0 mL), was added CF<sub>3</sub>CO<sub>2</sub>H (0.25 mL) under argon at room temperature. The mixture was stirred for 10 h at this temperature and concentrated in vacuo to obtain the salt. The salt was basified to pH 10 – 12 with 20% NaOH<sub>(aq)</sub>. The layers were separated and the aqueous layer was extracted with CH<sub>2</sub>Cl<sub>2</sub> (2 x 5 mL). The combined organic layers were washed with brine, dried over MgSO<sub>4</sub> and concentrated under reduced pressure to give 92 mg of (*S*)-(-)-anabasine in 100% yield.  $[\alpha]_{\text{D}}^{22} -73.4$  ( $c = 1.0$ , MeOH), lit.<sup>16d</sup>  $[\alpha]_{\text{D}}^{20} -80$  ( $c = 0.91$ , MeOH); all other spectroscopic data as reported.<sup>16</sup> <sup>1</sup>H NMR (300 MHz, CDCl<sub>3</sub>)  $\delta = 8.57$  (1H, s), 8.47 (1H, d), 7.77 (1H, d), 7.32–7.15 (1H, m), 3.62 (1H, d), 3.19 (1H, d), 2.79 (1H, t), 2.12–1.42 (6H, m); <sup>13</sup>C NMR (75.5 MHz, CDCl<sub>3</sub>)  $\delta = 148.6$ , 140.6, 134.2, 123.5, 59.8, 47.6, 34.8, 25.7, 25.2.

**Note:** (*R*)-(+)-anabasine was synthesized in the same way as the *S*-enantiomer;  $[\alpha]_{\text{D}}^{22} -70.9$  ( $c = 1.0$ , MeOH)

## 6.0. Vinylation of *N*-Boc-piperidine

### 6.1. Electrophilic quench with 1-bromo-1-propene: Synthesis of *R*-15

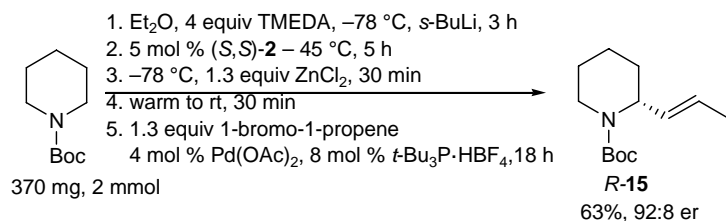

Using **General Procedure A**, *N*-Boc-piperidine (370 mg, 2.0 mmol), TMEDA (1.2 mL, 8.0 mmol, 4.0 equiv), Et<sub>2</sub>O (10 mL), *s*-BuLi (2.4 mL, 1.0 M, 2.4 mmol, 1.2 equiv), (*S,S*)-**2** (21.4 mg, 0.1 mmol, 5 mol %), in 0.40 mL Et<sub>2</sub>O pretreated with freshly titrated *s*-BuLi), ZnCl<sub>2</sub> (355 mg, 2.6 mmol, 1.3 equiv) in THF (2 mL), 1-bromo-1-propene (315 mg, 0.22 mL, 2.6 mmol, 1.3 equiv), Pd(OAc)<sub>2</sub> (20 mg, 0.08 mmol, 4 mol %) and *t*-Bu<sub>3</sub>P·HBF<sub>4</sub> (46 mg, 0.16 mmol, 8 mol %) gave the crude product as an oil. Purification by silica gel column chromatography eluting with Hexane/EtOAc (98:2) afforded 284 mg of the pure product as an oil in 63% yield and 92:8 er; spectroscopic data as reported.<sup>16</sup> [ $\alpha$ ]<sub>D</sub><sup>22</sup> 10.1 (*c* = 0.3, CHCl<sub>3</sub>). The er was determined by CSP-SFC as follows: **Column:** Pirkle-Whelk-O-1, **Flow Rate:** 0.5 mL/min, **Polarity Modifier %:** 1.0% EtOH, **Outlet Pressure = 150 psi**, **Oven Temperature = 35 °C**. The minor enantiomer elutes after ~21.4 min and the major enantiomer elutes after ~23.4 min. <sup>1</sup>H NMR (300 MHz; see HMQC for exact shifts):  $\delta$  5.53-5.45 (m, 2H), 4.72-4.70 (br, s, 1H), 3.75-3.70 (m, 1H), 2.78-2.74 (m, 1H), 1.65-1.38 (m, 9H), 1.45 (s, 9H); <sup>13</sup>C NMR (75.5 MHz):  $\delta$  155.6, 129.6, 126.5, 79.0, 51.3, 39.8, 29.3, 28.4 (3C), 25.5, 19.5, 13.1;

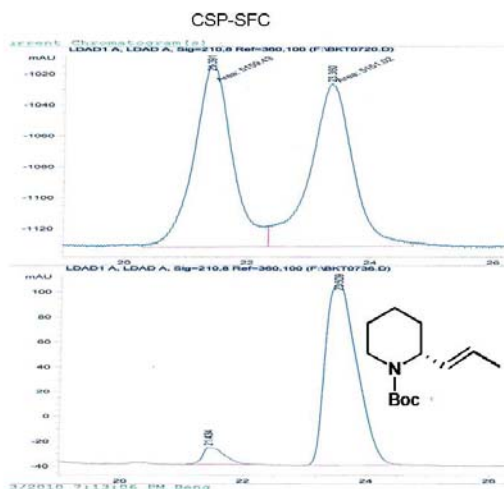

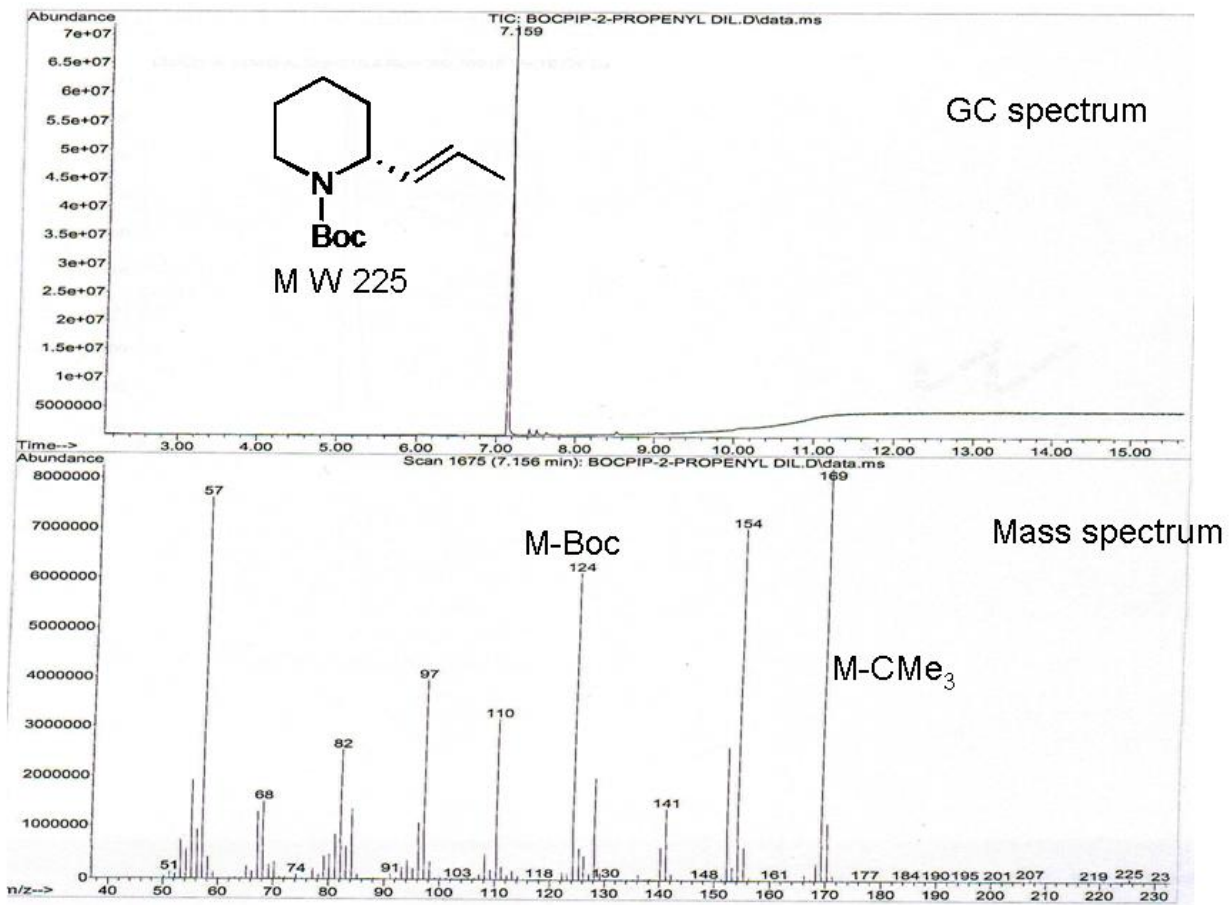

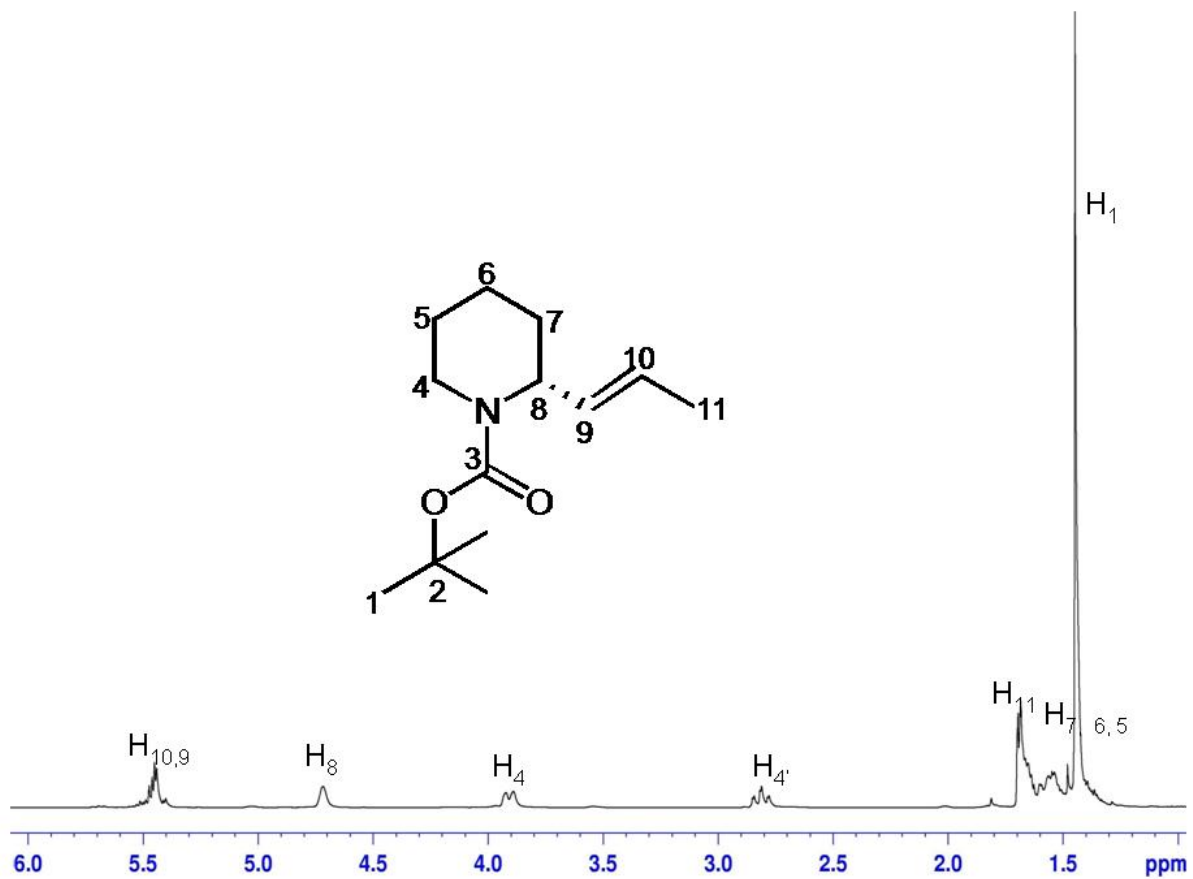

<sup>13</sup>C NMR

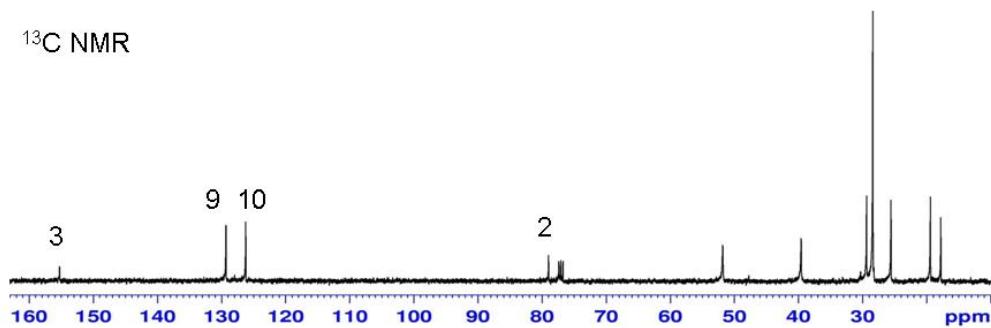

DEPT-135

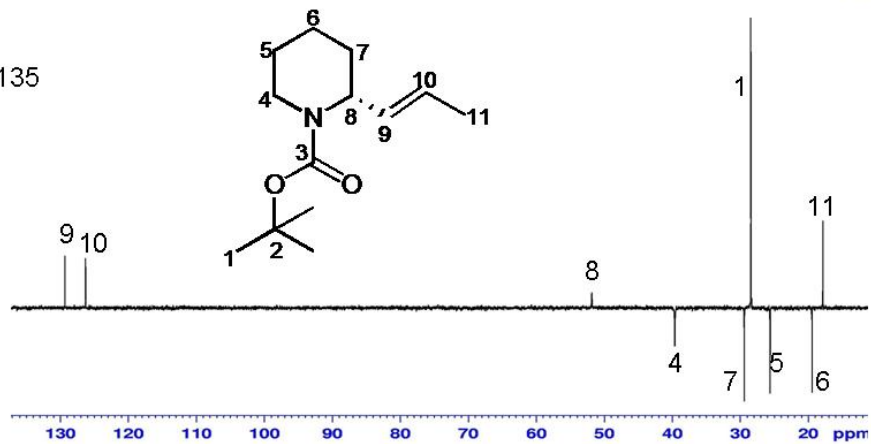

HMQC

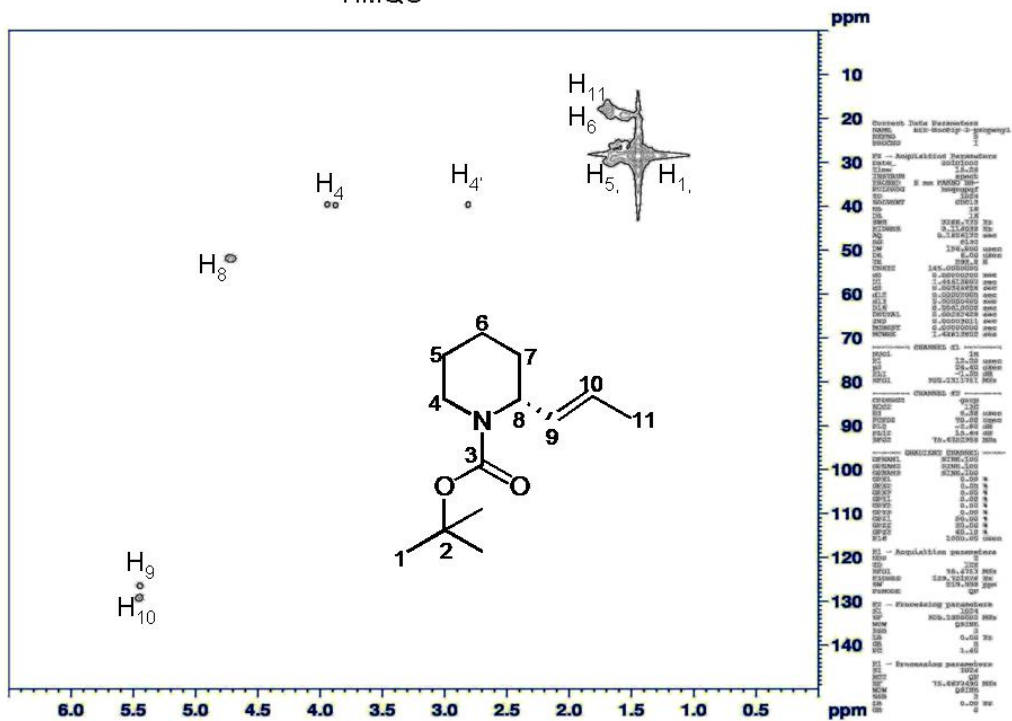

## 6.2. Electrophilic quench with $\beta$ -bromostyrene: Synthesis of *R*-16

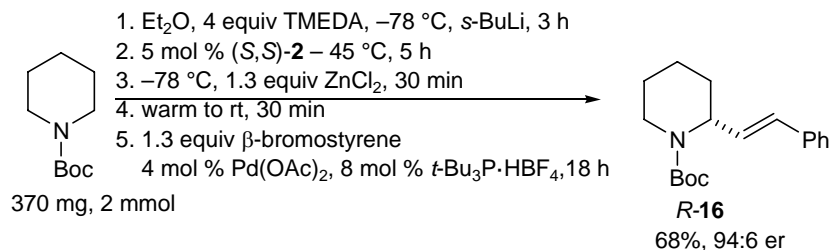

Using **General Procedure A**, *N*-Boc-piperidine (370 mg, 2.0 mmol), TMEDA (1.2 mL, 8.0 mmol, 4.0 equiv), Et<sub>2</sub>O (10 mL), *s*-BuLi (2.4 mL, 1.0 M, 2.4 mmol, 1.2 equiv), (*S,S*)-**2** (21.4 mg, 0.1 mmol, 5 mol %), in 0.40 mL Et<sub>2</sub>O pretreated with freshly titrated *s*-BuLi, ZnCl<sub>2</sub> (355 mg, 2.6 mmol, 1.3 equiv) in THF (2 mL),  $\beta$ -bromostyrene (476 mg, 0.35 mL, 2.6 mmol, 1.3 equiv), Pd(OAc)<sub>2</sub> (20 mg, 0.08 mmol, 4 mol %) and *t*-Bu<sub>3</sub>P·HBF<sub>4</sub> (46 mg, 0.16 mmol, 8 mol %) gave the crude product as an oil. Purification by silica gel column chromatography eluting with Hexane/EtOAc (98:2) afforded 390 mg of the pure product as an oil in 68% yield and 94:6 er; spectroscopic data as reported.<sup>16</sup> [ $\alpha$ ]<sub>D</sub><sup>22</sup> 108.5 (*c* = 0.3, CHCl<sub>3</sub>), lit<sup>16</sup> for *S*-**16** ([ $\alpha$ ]<sub>D</sub><sup>25</sup> -116.9 (*c* = 0.3, CHCl<sub>3</sub>)). The er was determined by CSP-SFC as follows: **Column**: Regis Technologies Pirkle-Whelk-O-1, **Chiral Stationary Phase**: 4-(3,5-dinitrobenzamido) tetrahydrophenanthrene, covalently bound to silica, **Flow Rate**: 2.0 mL/min, **Polarity Modifier %**: 2.0% EtOH, Outlet Pressure = **150 psi**, **Oven Temperature** = 35 °C. The minor enantiomer elutes after ~4.8 min and the major enantiomer elutes after ~6.9 min. <sup>1</sup>H NMR (300 MHz; exact chemical shifts obtained from HMQC):  $\delta$  7.38-7.15 (m, 5H), 6.39 (dd, 1H), 6.18 (dd, 1H), 4.95 (br, s, 1H), 3.98 (d, br, 1H), 2.95-2.88 (m, 1H), 1.82-1.52 (m, 6H), 1.46 (s, 9H); <sup>13</sup>C NMR (75.5 MHz):  $\delta$  155.5, 137.0, 130.7, 128.7, 128.5 (2C), 127.3, 126.2 (2C), 79.4, 52.2, 39.8, 29.5, 28.4 (3C), 25.5, 19.6.



# CSP-SFC

Current Chromatogram(s)  
LDAD1 B, LDAD B, Sig=254,16 Ref=360,100 (F:\BKT0903.D)

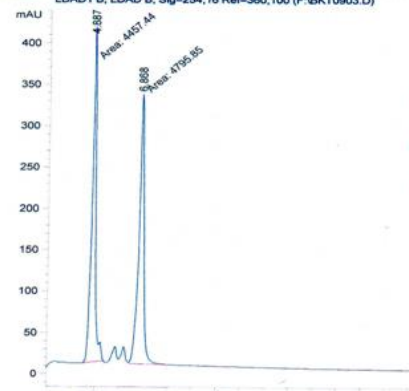

Injection Date : 20101021,193648000,1,480  
Sample Name : Location : Vial 3000  
Acq. Operator : Beng  
Acq. Instrument : SFC 3D system  
Acq. Method : BENG.M  
Analysis Method : C:\HPCHEM\2\METHODS\TKB.M  
Last changed : 10/21/2010 8:35:57 PM by Beng  
(modified after loading)

LDAD1 B, LDAD B, Sig=254,16 Ref=360,100 (F:\BKT0912.D)

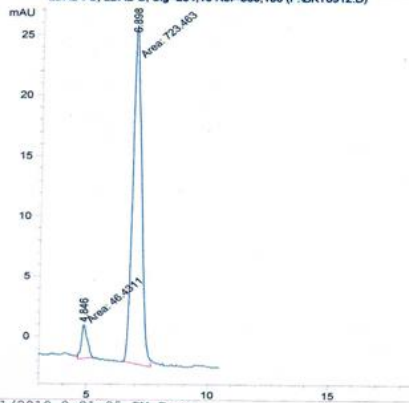

10/21/2010 8:01:05 PM Beng

LDAD1 B, LDAD B, Sig=254,16 Ref=360,100 (F:\BKT0912.D)

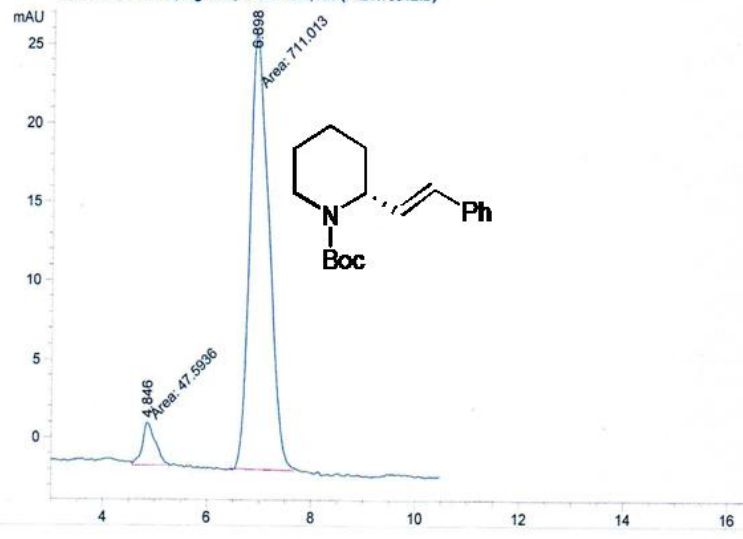

# GC-MS

File : C:\Documents and Settings\Administrator\Desktop\Cawley metho  
... s sequence\BENG\BTK-STY F1 DIL.D  
Operator : Beng  
Instrument : Instrument #1  
Acquired : 25 Oct 2010 18:11 using AcqMethod drug test method.M  
Sample Name: f1  
Misc Info :

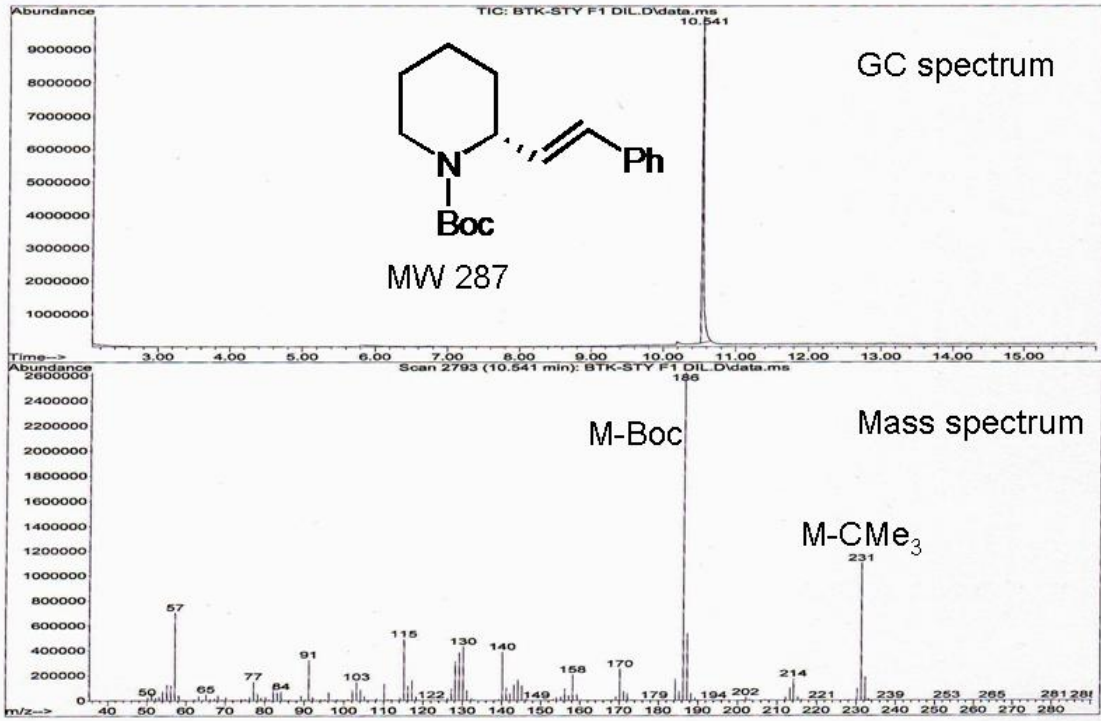

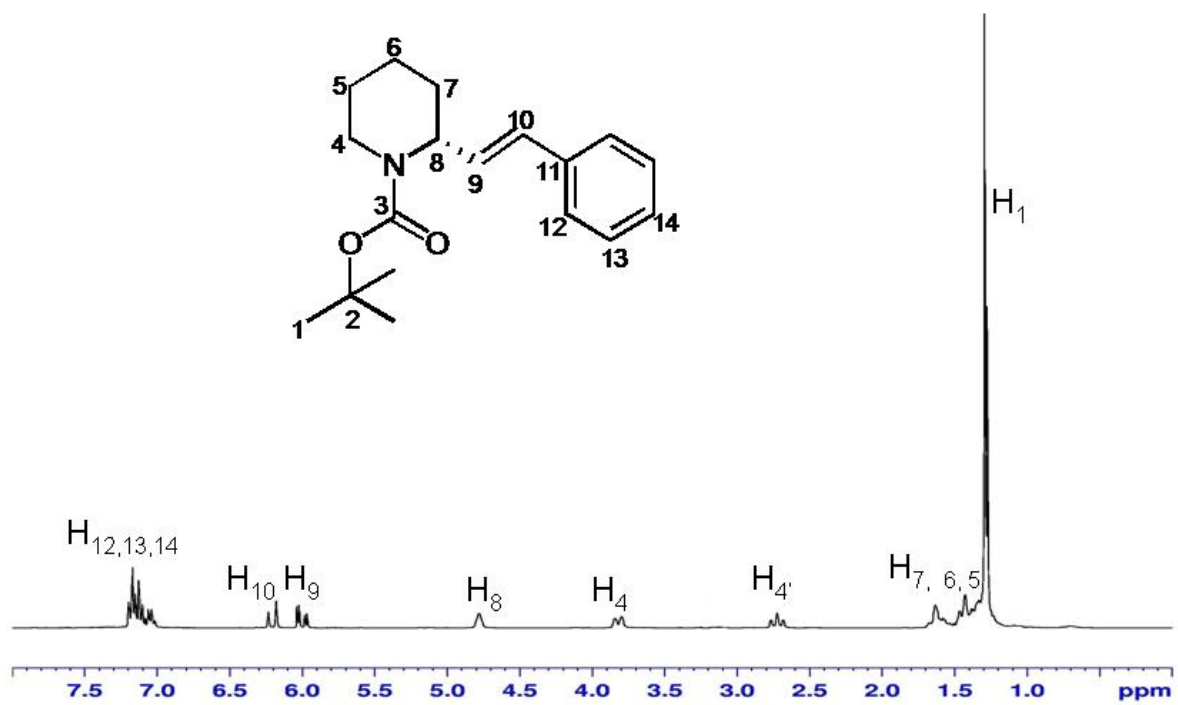

See full assignments on HMQC

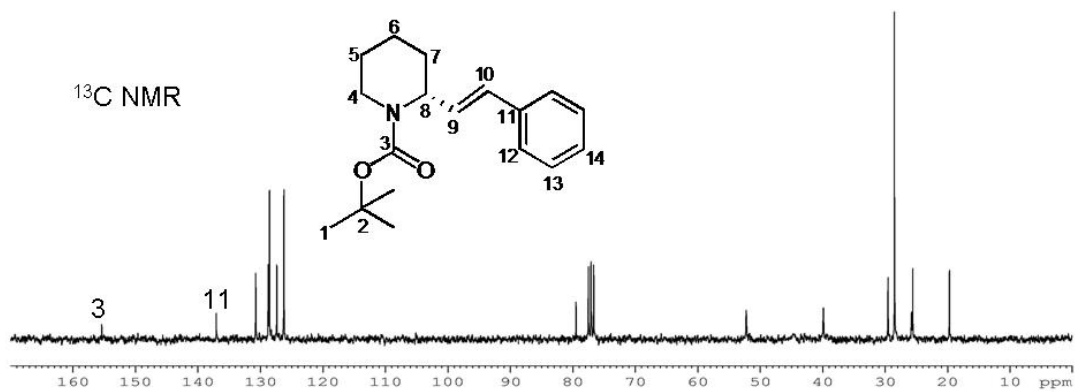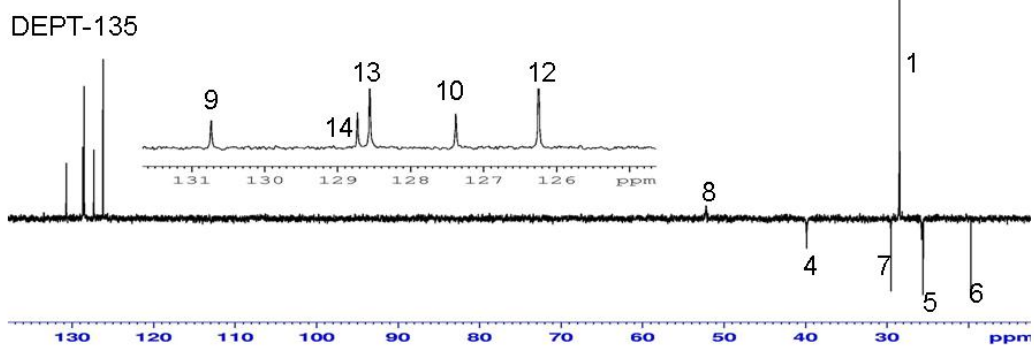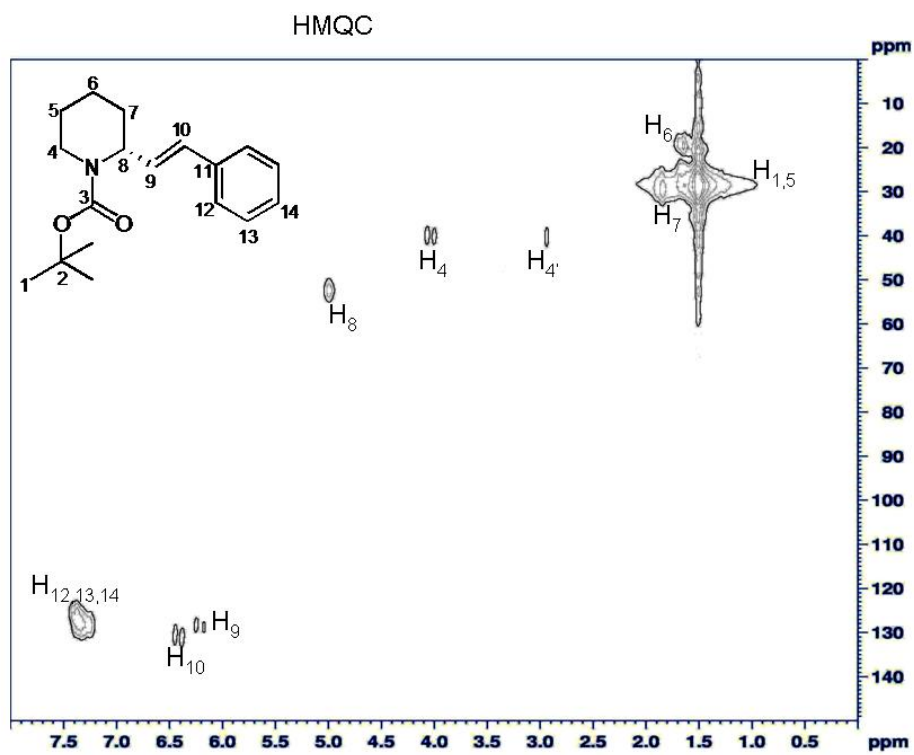

## 4.20. References

### No-D NMR Spectroscopy

(1) Hoye T. R., Eklov B. M, Ryba T. D, Voloshin M., Yao L. J., *Org lett* **2004**, 6, (6), 953–956

### Synthesis of conjugate acids of (S,S)-2 and (S,R)-2, CDR and DTR mechanisms

(2) (a) Beng, T. K.; Gawley, R. E. *J. Am. Chem. Soc.* **2010**, 132, (35), 12216-12217 (b) Beng, T.

K.; Yousaf, T. I.; Coldham, I.; Gawley, R. E. *J. Am. Chem. Soc.* **2009**, 131, 6908-6909 (c)

Coldham, I.; Leonori, D.; Beng, T. K.; Gawley, R. E., *Chem. Comm.* **2009**, 5239-5240;

corrigendum **2010**, DOI: 10.1039/B911024k.

### Phenyl bromide quench: R-3

(3) Coldham, I.; Leonori, D., *Org. Lett.* **2008**, 10, (17), 3923-3925 (b) J. C. A. Hunt, P. Laurent,

C. J. Moody, *J. Chem. Soc. Perkin Trans. 1* **2002**,

2378.

### 2-Bromotoluene quench: R- and S-4

(4) None

### 4-Bromoveratrole quench: R-5

(5) Stead, D., Carbone, G., O'Brien, P., Campos, K. R., Coldham, I., Sanderson, A., *J. Am. Chem. Soc.*, **2010**, 132, 7260.

### p-Bromo-tert-butylbenzene quench: R-6

(6) None

### 2-Bromomesitylene quench: R-7

(7) None

### p-Bromoacetophenone quench: R-8

(8) None

### p-Bromobenzonitrile quench: R-9

(9) None

### 4-Bromo-2-trifluoromethyl aniline quench: R-10

(10) None

### 1-Bromonaphthalene quench: R-11

(11) Dieter, R. K.; Li, S. *J. Org. Chem.* **1997**, 62, 7726

### 3-Bromopyridine quench: R-12

(12) Larivee, A.; Mousseau, J. J.; Charette, A. B. *J. Am. Chem. Soc.* **2008**, 130, 52.

**2-Bromopyridine quench: R-13**

(13) None

**2-Bromopyrimidine quench: R-14**

(14) None

**Synthesis of Anabasine**

(15) (a) Reference 3a, (b) Larivee, A.; Mousseau, J. J.; Charette, A. B. *J. Am. Chem. Soc.* **2008**, *130*, 52 (c) Wanner, M. J.; Koomen, G.-J. *J. Org. Chem.* **1996**, *61*, 5581, (d) Castro, A.; Ramirez, J.; Juarez, J.; Teran, J. L.; Orea, L.; Galindo, A.; Gnecco, D. *Heterocycles* **2007**, *71*, 2699, (e) Felpin, F.-X.; Girard, S.; Vo-Thanh, G.; Robins, R. J.; Villie'ras, J.; Lebreton, J. *J. Org. Chem.* **2001**, *66*, 6305

**1-Bromo-1-propene quench: R-15**

(16) None

**$\beta$ -bromostyrene quench: R-16**

(17) Cheng, G., Wang, X., Su, D., Liu, H., Liu, F., Hu, Y., *J. Org. Chem.* **2010**, *75*, 1911-1916.
